# Supplementary material for: Predicting the dye-sensitized solar cell performance of novel linear carbon chain-based dyes: insights from DFT simulations
Source: Royal Society of Chemistry journal article supplement (doi:10.1039/d3dt01856c), 2023-01-01
Supplement: d3dt01856c1.pdf [file d3dt01856c1.pdf]

# Predicting Dye-Sensitized Solar Cell performance of novel linear carbon chain-based dyes: insights from DFT simulations

Giuseppe Consiglio<sup>a</sup>, Adam Gorczyński<sup>b</sup>, Salvatore Petralia<sup>c</sup> and Giuseppe Forte<sup>\*c</sup>

<sup>a</sup> Department of Chemical Science University of Catania, Via S. Sofia 64, 95125, Italy,

<sup>b</sup> Faculty of Chemistry, Adam Mickiewicz University, Uniwersytetu Poznańskiego 8, 61-614 Poznań, Poland

<sup>c</sup> Department of Drug Science and Health University of Catania, Via S. Sofia 64, 95125, Italy.

Email [gforte@unict.it](mailto:gforte@unict.it)

Electronic supplementary information (ESI) available

## Electronic Supplementary Information:

Table 1 Band gap, and FMOs energies (eV) calculated using the PBE and M06 functionals in comparison with B3LYP.

|        | B3LYP |       |      | PBE   |       |      | M06   |       |      |
|--------|-------|-------|------|-------|-------|------|-------|-------|------|
|        | HOMO  | LUMO  | GAP  | HOMO  | LUMO  | GAP  | HOMO  | LUMO  | GAP  |
| PY-4N  | -5.07 | -3.34 | 1.73 | -5.25 | -3.26 | 1.99 | -5.34 | -3.19 | 2.15 |
| PY-3N  | -5.05 | -3.19 | 1.86 | -5.24 | -3.13 | 2.11 | -5.34 | -3.07 | 2.27 |
| PY-4NP | -5.09 | -3.26 | 1.83 | -5.22 | -3.11 | 2.11 | -5.31 | -3.04 | 2.27 |
| PY-3NP | -5.09 | -3.15 | 1.94 | -5.27 | -3.07 | 2.20 | -5.37 | -3.01 | 2.36 |

Table 2. C≡C bond length value (Å) for optimized Dyes@TiO<sub>2</sub> (C<sub>1</sub> is the carbon atom linked to acceptor group, C<sub>6</sub>/C<sub>8</sub> are the carbon atoms linked to donor)

|        | C <sub>1</sub> ≡C <sub>2</sub> | C <sub>2</sub> ≡C <sub>3</sub> | C <sub>3</sub> ≡C <sub>4</sub> | C <sub>4</sub> ≡C <sub>5</sub> | C <sub>5</sub> ≡C <sub>6</sub> | C <sub>6</sub> ≡C <sub>7</sub> | C <sub>7</sub> ≡C <sub>8</sub> | Av    |
|--------|--------------------------------|--------------------------------|--------------------------------|--------------------------------|--------------------------------|--------------------------------|--------------------------------|-------|
| PY-4N  | 1.214                          | 1.326                          | 1.215                          | 1.324                          | 1.216                          | 1.333                          | 1.211                          | 1.263 |
| PY-3N  | 1.215                          | 1.327                          | 1.211                          | 1.326                          | 1.214                          |                                |                                | 1.259 |
| PY-4NP | 1.217                          | 1.329                          | 1.215                          | 1.329                          | 1.217                          | 1.332                          | 1.213                          | 1.265 |
| PY-3NP | 1.218                          | 1.327                          | 1.214                          | 1.330                          | 1.218                          |                                |                                | 1.261 |

## Optimized geometries of Dyes@TiO<sub>2</sub>

```

data_TiO2@PY4COO
_audit_creation_method      'Materials Studio'
_symmetry_space_group_name_H-M  'P1'
_symmetry_Int_Tables_number    1
_symmetry_cell_setting        triclinic
loop_
_symmetry_equiv_pos_as_xyz
  x,y,z
_cell_length_a                38.6882
_cell_length_b                15.1040
_cell_length_c                47.5200
_cell_angle_alpha             90.0000
_cell_angle_beta              90.0000
_cell_angle_gamma             90.0000
loop_
_atom_site_label
_atom_site_type_symbol
_atom_site_fract_x
_atom_site_fract_y
_atom_site_fract_z
_atom_site_U_iso_or_equiv
_atom_site_adp_type
_atom_site_occupancy
Ti1  Ti  -0.01037  0.56900  0.85266  0.00000  Uiso  1.00
Ti2  Ti   0.88735  0.69459  0.90309  0.00000  Uiso  1.00
Ti3  Ti   0.93317  0.68809  0.86029  0.00000  Uiso  1.00
Ti4  Ti   0.83007  0.56997  0.91612  0.00000  Uiso  1.00
O5   O   0.94852  0.56762  0.87453  0.00000  Uiso  1.00
O6   O   0.83562  0.68868  0.90536  0.00000  Uiso  1.00
O7   O   0.88323  0.67481  0.86287  0.00000  Uiso  1.00
O8   O   0.78058  0.60178  0.92585  0.00000  Uiso  1.00
O9   O   0.88432  0.56473  0.91203  0.00000  Uiso  1.00
O10  O   0.97377  0.69197  0.83644  0.00000  Uiso  1.00
O11  O   0.93813  0.71936  0.89723  0.00000  Uiso  1.00
O12  O   0.80523  0.54525  0.88071  0.00000  Uiso  1.00
Ti13 Ti   0.01742  0.56244  0.92077  0.00000  Uiso  1.00
Ti14 Ti   0.90948  0.68650  0.97574  0.00000  Uiso  1.00
Ti15 Ti   0.96096  0.69446  0.93277  0.00000  Uiso  1.00
Ti16 Ti   0.85253  0.56478  0.98949  0.00000  Uiso  1.00
O17  O   0.96279  0.56692  0.92416  0.00000  Uiso  1.00
O18  O   0.87055  0.69054  1.00301  0.00000  Uiso  1.00
O19  O   0.90966  0.71829  0.93849  0.00000  Uiso  1.00
O20  O   0.80262  0.53886  0.99892  0.00000  Uiso  1.00
O21  O   0.89095  0.56461  0.96366  0.00000  Uiso  1.00
O22  O   0.01524  0.68907  0.92936  0.00000  Uiso  1.00
O23  O   0.96081  0.67362  0.97369  0.00000  Uiso  1.00
O24  O   0.83265  0.59694  0.95455  0.00000  Uiso  1.00

```

|      |    |          |         |         |         |      |      |
|------|----|----------|---------|---------|---------|------|------|
| Ti25 | Ti | -0.01193 | 0.81635 | 0.85334 | 0.00000 | Uiso | 1.00 |
| Ti26 | Ti | 0.88529  | 0.93573 | 0.90655 | 0.00000 | Uiso | 1.00 |
| Ti27 | Ti | 0.93106  | 0.94789 | 0.86028 | 0.00000 | Uiso | 1.00 |
| Ti28 | Ti | 0.82587  | 0.81084 | 0.91299 | 0.00000 | Uiso | 1.00 |
| O29  | O  | 0.94464  | 0.81802 | 0.87177 | 0.00000 | Uiso | 1.00 |
| O30  | O  | 0.83464  | 0.94035 | 0.92224 | 0.00000 | Uiso | 1.00 |
| O31  | O  | 0.87959  | 0.95964 | 0.86637 | 0.00000 | Uiso | 1.00 |
| O32  | O  | 0.77612  | 0.78455 | 0.92496 | 0.00000 | Uiso | 1.00 |
| O33  | O  | 0.87440  | 0.81682 | 0.89849 | 0.00000 | Uiso | 1.00 |
| O34  | O  | 0.97462  | 0.94350 | 0.83851 | 0.00000 | Uiso | 1.00 |
| O35  | O  | 0.93429  | 0.91058 | 0.89624 | 0.00000 | Uiso | 1.00 |
| O36  | O  | 0.80477  | 0.82823 | 0.87558 | 0.00000 | Uiso | 1.00 |
| Ti37 | Ti | 0.02174  | 0.81874 | 0.92320 | 0.00000 | Uiso | 1.00 |
| Ti38 | Ti | 0.91204  | 0.94710 | 0.97582 | 0.00000 | Uiso | 1.00 |
| Ti39 | Ti | 0.95878  | 0.93562 | 0.92998 | 0.00000 | Uiso | 1.00 |
| Ti40 | Ti | 0.85361  | 0.81703 | 0.98829 | 0.00000 | Uiso | 1.00 |
| O41  | O  | 0.97242  | 0.81532 | 0.93796 | 0.00000 | Uiso | 1.00 |
| O42  | O  | 0.87289  | 0.94155 | 1.00123 | 0.00000 | Uiso | 1.00 |
| O43  | O  | 0.90980  | 0.90897 | 0.94010 | 0.00000 | Uiso | 1.00 |
| O44  | O  | 0.80450  | 0.84422 | 0.99860 | 0.00000 | Uiso | 1.00 |
| O45  | O  | 0.89527  | 0.81819 | 0.96681 | 0.00000 | Uiso | 1.00 |
| O46  | O  | 0.00809  | 0.94016 | 0.91478 | 0.00000 | Uiso | 1.00 |
| O47  | O  | 0.96375  | 0.95905 | 0.97028 | 0.00000 | Uiso | 1.00 |
| O48  | O  | 0.83304  | 0.78967 | 0.95207 | 0.00000 | Uiso | 1.00 |
| Ti49 | Ti | 0.75490  | 0.56340 | 0.89475 | 0.00000 | Uiso | 1.00 |
| Ti50 | Ti | 0.65369  | 0.69347 | 0.94088 | 0.00000 | Uiso | 1.00 |
| Ti51 | Ti | 0.69456  | 0.68960 | 0.89062 | 0.00000 | Uiso | 1.00 |
| Ti52 | Ti | 0.59552  | 0.56496 | 0.94544 | 0.00000 | Uiso | 1.00 |
| O53  | O  | 0.70202  | 0.56130 | 0.90435 | 0.00000 | Uiso | 1.00 |
| O54  | O  | 0.60424  | 0.68700 | 0.95534 | 0.00000 | Uiso | 1.00 |
| O55  | O  | 0.64672  | 0.71975 | 0.90317 | 0.00000 | Uiso | 1.00 |
| O56  | O  | 0.54529  | 0.57387 | 0.96043 | 0.00000 | Uiso | 1.00 |
| O57  | O  | 0.64606  | 0.56505 | 0.92944 | 0.00000 | Uiso | 1.00 |
| O58  | O  | 0.74239  | 0.68161 | 0.87691 | 0.00000 | Uiso | 1.00 |
| O59  | O  | 0.70364  | 0.72006 | 0.92837 | 0.00000 | Uiso | 1.00 |
| O60  | O  | 0.56726  | 0.59237 | 0.91222 | 0.00000 | Uiso | 1.00 |
| Ti61 | Ti | 0.78486  | 0.56969 | 0.96274 | 0.00000 | Uiso | 1.00 |
| Ti62 | Ti | 0.62581  | 0.68056 | 0.87028 | 0.00000 | Uiso | 1.00 |
| Ti63 | Ti | 0.72420  | 0.69259 | 0.96426 | 0.00000 | Uiso | 1.00 |
| Ti64 | Ti | 0.56585  | 0.55985 | 0.87394 | 0.00000 | Uiso | 1.00 |
| O65  | O  | 0.73696  | 0.56262 | 0.97155 | 0.00000 | Uiso | 1.00 |
| O66  | O  | 0.57679  | 0.68577 | 0.85655 | 0.00000 | Uiso | 1.00 |
| O67  | O  | 0.67558  | 0.67413 | 0.97797 | 0.00000 | Uiso | 1.00 |
| O68  | O  | 0.51612  | 0.53303 | 0.88471 | 0.00000 | Uiso | 1.00 |
| O69  | O  | 0.61268  | 0.55976 | 0.88730 | 0.00000 | Uiso | 1.00 |
| O70  | O  | 0.77602  | 0.69226 | 0.97466 | 0.00000 | Uiso | 1.00 |
| O71  | O  | 0.67273  | 0.66041 | 0.85453 | 0.00000 | Uiso | 1.00 |
| O72  | O  | 0.61599  | 0.53645 | 0.98072 | 0.00000 | Uiso | 1.00 |
| Ti73 | Ti | 0.75576  | 0.81139 | 0.88872 | 0.00000 | Uiso | 1.00 |
| Ti74 | Ti | 0.65065  | 0.93437 | 0.93705 | 0.00000 | Uiso | 1.00 |
| Ti75 | Ti | 0.69514  | 0.93367 | 0.89025 | 0.00000 | Uiso | 1.00 |

|       |    |         |         |         |         |      |      |
|-------|----|---------|---------|---------|---------|------|------|
| Ti76  | Ti | 0.59168 | 0.81331 | 0.95043 | 0.00000 | Uiso | 1.00 |
| O77   | O  | 0.70409 | 0.81174 | 0.87832 | 0.00000 | Uiso | 1.00 |
| O78   | O  | 0.59676 | 0.93912 | 0.93779 | 0.00000 | Uiso | 1.00 |
| O79   | O  | 0.64821 | 0.90120 | 0.90034 | 0.00000 | Uiso | 1.00 |
| O80   | O  | 0.53875 | 0.80134 | 0.95953 | 0.00000 | Uiso | 1.00 |
| O81   | O  | 0.64396 | 0.81545 | 0.94825 | 0.00000 | Uiso | 1.00 |
| O82   | O  | 0.74309 | 0.94156 | 0.88053 | 0.00000 | Uiso | 1.00 |
| O83   | O  | 0.70026 | 0.90130 | 0.92708 | 0.00000 | Uiso | 1.00 |
| O84   | O  | 0.56740 | 0.78587 | 0.91492 | 0.00000 | Uiso | 1.00 |
| Ti85  | Ti | 0.78479 | 0.81518 | 0.96273 | 0.00000 | Uiso | 1.00 |
| Ti86  | Ti | 0.62754 | 0.94471 | 0.86910 | 0.00000 | Uiso | 1.00 |
| Ti87  | Ti | 0.72563 | 0.94073 | 0.95782 | 0.00000 | Uiso | 1.00 |
| Ti88  | Ti | 0.56914 | 0.81203 | 0.87520 | 0.00000 | Uiso | 1.00 |
| O89   | O  | 0.73711 | 0.82255 | 0.97584 | 0.00000 | Uiso | 1.00 |
| O90   | O  | 0.57953 | 0.93703 | 0.85728 | 0.00000 | Uiso | 1.00 |
| O91   | O  | 0.67630 | 0.96069 | 0.97207 | 0.00000 | Uiso | 1.00 |
| O92   | O  | 0.52187 | 0.84879 | 0.88508 | 0.00000 | Uiso | 1.00 |
| O93   | O  | 0.61715 | 0.81416 | 0.88259 | 0.00000 | Uiso | 1.00 |
| O94   | O  | 0.77844 | 0.94252 | 0.94881 | 0.00000 | Uiso | 1.00 |
| O95   | O  | 0.67504 | 0.96508 | 0.85388 | 0.00000 | Uiso | 1.00 |
| O96   | O  | 0.60466 | 0.84160 | 0.98830 | 0.00000 | Uiso | 1.00 |
| Ti97  | Ti | 0.51962 | 0.56759 | 0.92415 | 0.00000 | Uiso | 1.00 |
| Ti98  | Ti | 0.41006 | 0.69787 | 0.97505 | 0.00000 | Uiso | 1.00 |
| Ti99  | Ti | 0.45741 | 0.68467 | 0.92941 | 0.00000 | Uiso | 1.00 |
| Ti100 | Ti | 0.35373 | 0.56690 | 0.98819 | 0.00000 | Uiso | 1.00 |
| O101  | O  | 0.47105 | 0.56465 | 0.93916 | 0.00000 | Uiso | 1.00 |
| O102  | O  | 0.37140 | 0.69290 | 1.00279 | 0.00000 | Uiso | 1.00 |
| O103  | O  | 0.40744 | 0.66010 | 0.93845 | 0.00000 | Uiso | 1.00 |
| O104  | O  | 0.30476 | 0.54040 | 0.99855 | 0.00000 | Uiso | 1.00 |
| O105  | O  | 0.39516 | 0.56587 | 0.96648 | 0.00000 | Uiso | 1.00 |
| O106  | O  | 0.50700 | 0.68920 | 0.91552 | 0.00000 | Uiso | 1.00 |
| O107  | O  | 0.46160 | 0.71142 | 0.96956 | 0.00000 | Uiso | 1.00 |
| O108  | O  | 0.33356 | 0.59277 | 0.95177 | 0.00000 | Uiso | 1.00 |
| Ti109 | Ti | 0.48511 | 0.55643 | 0.85259 | 0.00000 | Uiso | 1.00 |
| Ti110 | Ti | 0.38785 | 0.68297 | 0.90247 | 0.00000 | Uiso | 1.00 |
| Ti111 | Ti | 0.43292 | 0.69522 | 0.85700 | 0.00000 | Uiso | 1.00 |
| Ti112 | Ti | 0.32615 | 0.56826 | 0.91296 | 0.00000 | Uiso | 1.00 |
| O113  | O  | 0.43430 | 0.56196 | 0.84746 | 0.00000 | Uiso | 1.00 |
| O114  | O  | 0.33626 | 0.69090 | 0.90545 | 0.00000 | Uiso | 1.00 |
| O115  | O  | 0.38290 | 0.70234 | 0.86389 | 0.00000 | Uiso | 1.00 |
| O116  | O  | 0.27647 | 0.59444 | 0.92474 | 0.00000 | Uiso | 1.00 |
| O117  | O  | 0.37454 | 0.56182 | 0.89805 | 0.00000 | Uiso | 1.00 |
| O118  | O  | 0.48179 | 0.69026 | 0.84702 | 0.00000 | Uiso | 1.00 |
| O119  | O  | 0.43777 | 0.65371 | 0.89389 | 0.00000 | Uiso | 1.00 |
| O120  | O  | 0.30418 | 0.54800 | 0.87605 | 0.00000 | Uiso | 1.00 |
| Ti121 | Ti | 0.51703 | 0.81131 | 0.92211 | 0.00000 | Uiso | 1.00 |
| Ti122 | Ti | 0.41076 | 0.93613 | 0.97517 | 0.00000 | Uiso | 1.00 |
| Ti123 | Ti | 0.46103 | 0.94433 | 0.93195 | 0.00000 | Uiso | 1.00 |
| Ti124 | Ti | 0.35230 | 0.81740 | 0.98940 | 0.00000 | Uiso | 1.00 |
| O125  | O  | 0.46237 | 0.81648 | 0.92252 | 0.00000 | Uiso | 1.00 |
| O126  | O  | 0.37229 | 0.94147 | 1.00088 | 0.00000 | Uiso | 1.00 |

|       |    |         |         |         |         |      |      |
|-------|----|---------|---------|---------|---------|------|------|
| O127  | O  | 0.41166 | 0.97256 | 0.93910 | 0.00000 | Uiso | 1.00 |
| O128  | O  | 0.30206 | 0.84009 | 0.99878 | 0.00000 | Uiso | 1.00 |
| O129  | O  | 0.39015 | 0.81858 | 0.96303 | 0.00000 | Uiso | 1.00 |
| O130  | O  | 0.51498 | 0.93848 | 0.92961 | 0.00000 | Uiso | 1.00 |
| O131  | O  | 0.46171 | 0.92032 | 0.97250 | 0.00000 | Uiso | 1.00 |
| O132  | O  | 0.33273 | 0.78319 | 0.95461 | 0.00000 | Uiso | 1.00 |
| Ti133 | Ti | 0.48712 | 0.81507 | 0.86074 | 0.00000 | Uiso | 1.00 |
| Ti134 | Ti | 0.38802 | 0.94489 | 0.90633 | 0.00000 | Uiso | 1.00 |
| Ti135 | Ti | 0.42980 | 0.92778 | 0.85759 | 0.00000 | Uiso | 1.00 |
| Ti136 | Ti | 0.33190 | 0.81046 | 0.91603 | 0.00000 | Uiso | 1.00 |
| O137  | O  | 0.43978 | 0.81176 | 0.87323 | 0.00000 | Uiso | 1.00 |
| O138  | O  | 0.33735 | 0.93973 | 0.92258 | 0.00000 | Uiso | 1.00 |
| O139  | O  | 0.37960 | 0.92136 | 0.86843 | 0.00000 | Uiso | 1.00 |
| O140  | O  | 0.28185 | 0.78245 | 0.92453 | 0.00000 | Uiso | 1.00 |
| O141  | O  | 0.38640 | 0.81392 | 0.91172 | 0.00000 | Uiso | 1.00 |
| O142  | O  | 0.47658 | 0.93225 | 0.84283 | 0.00000 | Uiso | 1.00 |
| O143  | O  | 0.43884 | 0.96929 | 0.89473 | 0.00000 | Uiso | 1.00 |
| O144  | O  | 0.31063 | 0.83521 | 0.87947 | 0.00000 | Uiso | 1.00 |
| Ti145 | Ti | 0.28546 | 0.56668 | 0.96241 | 0.00000 | Uiso | 1.00 |
| Ti146 | Ti | 0.13112 | 0.69002 | 0.86575 | 0.00000 | Uiso | 1.00 |
| Ti147 | Ti | 0.22295 | 0.68574 | 0.96376 | 0.00000 | Uiso | 1.00 |
| Ti148 | Ti | 0.07192 | 0.56376 | 0.87315 | 0.00000 | Uiso | 1.00 |
| O149  | O  | 0.23861 | 0.55864 | 0.97506 | 0.00000 | Uiso | 1.00 |
| O150  | O  | 0.08233 | 0.68954 | 0.85574 | 0.00000 | Uiso | 1.00 |
| O151  | O  | 0.17215 | 0.67398 | 0.97502 | 0.00000 | Uiso | 1.00 |
| O152  | O  | 0.02309 | 0.59433 | 0.88136 | 0.00000 | Uiso | 1.00 |
| O153  | O  | 0.12098 | 0.56438 | 0.88122 | 0.00000 | Uiso | 1.00 |
| O154  | O  | 0.27516 | 0.68838 | 0.97362 | 0.00000 | Uiso | 1.00 |
| O155  | O  | 0.17856 | 0.71427 | 0.85106 | 0.00000 | Uiso | 1.00 |
| O156  | O  | 0.11284 | 0.59147 | 0.98170 | 0.00000 | Uiso | 1.00 |
| Ti157 | Ti | 0.25479 | 0.56565 | 0.88900 | 0.00000 | Uiso | 1.00 |
| Ti158 | Ti | 0.15250 | 0.68601 | 0.93632 | 0.00000 | Uiso | 1.00 |
| Ti159 | Ti | 0.19820 | 0.69661 | 0.88872 | 0.00000 | Uiso | 1.00 |
| Ti160 | Ti | 0.09373 | 0.56484 | 0.94576 | 0.00000 | Uiso | 1.00 |
| O161  | O  | 0.20094 | 0.56592 | 0.88087 | 0.00000 | Uiso | 1.00 |
| O162  | O  | 0.09858 | 0.69213 | 0.93736 | 0.00000 | Uiso | 1.00 |
| O163  | O  | 0.15101 | 0.71293 | 0.89941 | 0.00000 | Uiso | 1.00 |
| O164  | O  | 0.04209 | 0.55624 | 0.95837 | 0.00000 | Uiso | 1.00 |
| O165  | O  | 0.14202 | 0.56522 | 0.93037 | 0.00000 | Uiso | 1.00 |
| O166  | O  | 0.24590 | 0.69282 | 0.87522 | 0.00000 | Uiso | 1.00 |
| O167  | O  | 0.20380 | 0.66510 | 0.92717 | 0.00000 | Uiso | 1.00 |
| O168  | O  | 0.06732 | 0.53781 | 0.91231 | 0.00000 | Uiso | 1.00 |
| Ti169 | Ti | 0.28458 | 0.81111 | 0.96229 | 0.00000 | Uiso | 1.00 |
| Ti170 | Ti | 0.12946 | 0.93644 | 0.86595 | 0.00000 | Uiso | 1.00 |
| Ti171 | Ti | 0.22704 | 0.94192 | 0.95750 | 0.00000 | Uiso | 1.00 |
| Ti172 | Ti | 0.07009 | 0.81349 | 0.87319 | 0.00000 | Uiso | 1.00 |
| O173  | O  | 0.23554 | 0.81787 | 0.97110 | 0.00000 | Uiso | 1.00 |
| O174  | O  | 0.07971 | 0.93773 | 0.85445 | 0.00000 | Uiso | 1.00 |
| O175  | O  | 0.17915 | 0.95725 | 0.97450 | 0.00000 | Uiso | 1.00 |
| O176  | O  | 0.02087 | 0.78870 | 0.88324 | 0.00000 | Uiso | 1.00 |
| O177  | O  | 0.11757 | 0.81195 | 0.88212 | 0.00000 | Uiso | 1.00 |

|       |    |          |         |         |         |      |      |
|-------|----|----------|---------|---------|---------|------|------|
| O178  | O  | 0.27985  | 0.93950 | 0.94904 | 0.00000 | Uiso | 1.00 |
| O179  | O  | 0.17717  | 0.91383 | 0.85159 | 0.00000 | Uiso | 1.00 |
| O180  | O  | 0.11272  | 0.78998 | 0.98516 | 0.00000 | Uiso | 1.00 |
| Ti181 | Ti | 0.25966  | 0.81568 | 0.89101 | 0.00000 | Uiso | 1.00 |
| Ti182 | Ti | 0.15424  | 0.94672 | 0.93894 | 0.00000 | Uiso | 1.00 |
| Ti183 | Ti | 0.19616  | 0.93485 | 0.88915 | 0.00000 | Uiso | 1.00 |
| Ti184 | Ti | 0.09711  | 0.81688 | 0.94792 | 0.00000 | Uiso | 1.00 |
| O185  | O  | 0.20888  | 0.81615 | 0.90167 | 0.00000 | Uiso | 1.00 |
| O186  | O  | 0.10543  | 0.94109 | 0.95466 | 0.00000 | Uiso | 1.00 |
| O187  | O  | 0.14748  | 0.92034 | 0.90132 | 0.00000 | Uiso | 1.00 |
| O188  | O  | 0.04544  | 0.82698 | 0.95973 | 0.00000 | Uiso | 1.00 |
| O189  | O  | 0.15086  | 0.81571 | 0.94190 | 0.00000 | Uiso | 1.00 |
| O190  | O  | 0.24409  | 0.93855 | 0.87802 | 0.00000 | Uiso | 1.00 |
| O191  | O  | 0.20219  | 0.97015 | 0.92535 | 0.00000 | Uiso | 1.00 |
| O192  | O  | 0.07100  | 0.84227 | 0.91255 | 0.00000 | Uiso | 1.00 |
| Ti193 | Ti | -0.01037 | 0.06898 | 0.85266 | 0.00000 | Uiso | 1.00 |
| Ti194 | Ti | 0.88736  | 0.19455 | 0.90310 | 0.00000 | Uiso | 1.00 |
| Ti195 | Ti | 0.93317  | 0.18808 | 0.86029 | 0.00000 | Uiso | 1.00 |
| Ti196 | Ti | 0.83007  | 0.06995 | 0.91614 | 0.00000 | Uiso | 1.00 |
| O197  | O  | 0.94853  | 0.06762 | 0.87453 | 0.00000 | Uiso | 1.00 |
| O198  | O  | 0.83563  | 0.18865 | 0.90537 | 0.00000 | Uiso | 1.00 |
| O199  | O  | 0.88324  | 0.17477 | 0.86288 | 0.00000 | Uiso | 1.00 |
| O200  | O  | 0.78058  | 0.10172 | 0.92586 | 0.00000 | Uiso | 1.00 |
| O201  | O  | 0.88432  | 0.06470 | 0.91205 | 0.00000 | Uiso | 1.00 |
| O202  | O  | 0.97376  | 0.19195 | 0.83644 | 0.00000 | Uiso | 1.00 |
| O203  | O  | 0.93814  | 0.21931 | 0.89723 | 0.00000 | Uiso | 1.00 |
| O204  | O  | 0.80523  | 0.04511 | 0.88074 | 0.00000 | Uiso | 1.00 |
| Ti205 | Ti | 0.01742  | 0.06240 | 0.92077 | 0.00000 | Uiso | 1.00 |
| Ti206 | Ti | 0.90949  | 0.18650 | 0.97574 | 0.00000 | Uiso | 1.00 |
| Ti207 | Ti | 0.96096  | 0.19443 | 0.93277 | 0.00000 | Uiso | 1.00 |
| Ti208 | Ti | 0.85252  | 0.06479 | 0.98950 | 0.00000 | Uiso | 1.00 |
| O209  | O  | 0.96279  | 0.06689 | 0.92417 | 0.00000 | Uiso | 1.00 |
| O210  | O  | 0.87056  | 0.19055 | 1.00302 | 0.00000 | Uiso | 1.00 |
| O211  | O  | 0.90966  | 0.21826 | 0.93850 | 0.00000 | Uiso | 1.00 |
| O212  | O  | 0.80261  | 0.03896 | 0.99895 | 0.00000 | Uiso | 1.00 |
| O213  | O  | 0.89095  | 0.06462 | 0.96367 | 0.00000 | Uiso | 1.00 |
| O214  | O  | 0.01524  | 0.18904 | 0.92936 | 0.00000 | Uiso | 1.00 |
| O215  | O  | 0.96081  | 0.17362 | 0.97369 | 0.00000 | Uiso | 1.00 |
| O216  | O  | 0.83264  | 0.09697 | 0.95456 | 0.00000 | Uiso | 1.00 |
| Ti217 | Ti | -0.01194 | 0.31635 | 0.85333 | 0.00000 | Uiso | 1.00 |
| Ti218 | Ti | 0.88530  | 0.43575 | 0.90655 | 0.00000 | Uiso | 1.00 |
| Ti219 | Ti | 0.93106  | 0.44789 | 0.86027 | 0.00000 | Uiso | 1.00 |
| Ti220 | Ti | 0.82590  | 0.31081 | 0.91299 | 0.00000 | Uiso | 1.00 |
| O221  | O  | 0.94463  | 0.31802 | 0.87176 | 0.00000 | Uiso | 1.00 |
| O222  | O  | 0.83465  | 0.44035 | 0.92222 | 0.00000 | Uiso | 1.00 |
| O223  | O  | 0.87960  | 0.45962 | 0.86636 | 0.00000 | Uiso | 1.00 |
| O224  | O  | 0.77616  | 0.28450 | 0.92496 | 0.00000 | Uiso | 1.00 |
| O225  | O  | 0.87443  | 0.31680 | 0.89850 | 0.00000 | Uiso | 1.00 |
| O226  | O  | 0.97462  | 0.44351 | 0.83850 | 0.00000 | Uiso | 1.00 |
| O227  | O  | 0.93430  | 0.41061 | 0.89623 | 0.00000 | Uiso | 1.00 |
| O228  | O  | 0.80485  | 0.32818 | 0.87558 | 0.00000 | Uiso | 1.00 |

|       |    |         |         |         |         |      |      |
|-------|----|---------|---------|---------|---------|------|------|
| Ti229 | Ti | 0.02172 | 0.31872 | 0.92319 | 0.00000 | Uiso | 1.00 |
| Ti230 | Ti | 0.91204 | 0.44710 | 0.97582 | 0.00000 | Uiso | 1.00 |
| Ti231 | Ti | 0.95879 | 0.43564 | 0.92998 | 0.00000 | Uiso | 1.00 |
| Ti232 | Ti | 0.85361 | 0.31704 | 0.98830 | 0.00000 | Uiso | 1.00 |
| O233  | O  | 0.97241 | 0.31532 | 0.93795 | 0.00000 | Uiso | 1.00 |
| O234  | O  | 0.87290 | 0.44156 | 1.00122 | 0.00000 | Uiso | 1.00 |
| O235  | O  | 0.90980 | 0.40901 | 0.94009 | 0.00000 | Uiso | 1.00 |
| O236  | O  | 0.80450 | 0.34429 | 0.99859 | 0.00000 | Uiso | 1.00 |
| O237  | O  | 0.89527 | 0.31819 | 0.96681 | 0.00000 | Uiso | 1.00 |
| O238  | O  | 0.00810 | 0.44018 | 0.91478 | 0.00000 | Uiso | 1.00 |
| O239  | O  | 0.96376 | 0.45906 | 0.97028 | 0.00000 | Uiso | 1.00 |
| O240  | O  | 0.83305 | 0.28966 | 0.95207 | 0.00000 | Uiso | 1.00 |
| Ti241 | Ti | 0.75490 | 0.06327 | 0.89478 | 0.00000 | Uiso | 1.00 |
| Ti242 | Ti | 0.65360 | 0.19369 | 0.94082 | 0.00000 | Uiso | 1.00 |
| Ti243 | Ti | 0.69468 | 0.18962 | 0.89062 | 0.00000 | Uiso | 1.00 |
| Ti244 | Ti | 0.59549 | 0.06513 | 0.94561 | 0.00000 | Uiso | 1.00 |
| O245  | O  | 0.70201 | 0.06137 | 0.90439 | 0.00000 | Uiso | 1.00 |
| O246  | O  | 0.60404 | 0.18737 | 0.95514 | 0.00000 | Uiso | 1.00 |
| O247  | O  | 0.64682 | 0.21984 | 0.90306 | 0.00000 | Uiso | 1.00 |
| O248  | O  | 0.54522 | 0.07387 | 0.96072 | 0.00000 | Uiso | 1.00 |
| O249  | O  | 0.64601 | 0.06511 | 0.92953 | 0.00000 | Uiso | 1.00 |
| O250  | O  | 0.74250 | 0.18156 | 0.87697 | 0.00000 | Uiso | 1.00 |
| O251  | O  | 0.70360 | 0.22026 | 0.92839 | 0.00000 | Uiso | 1.00 |
| O252  | O  | 0.56736 | 0.09267 | 0.91236 | 0.00000 | Uiso | 1.00 |
| Ti253 | Ti | 0.78484 | 0.06973 | 0.96277 | 0.00000 | Uiso | 1.00 |
| Ti254 | Ti | 0.62620 | 0.18043 | 0.87012 | 0.00000 | Uiso | 1.00 |
| Ti255 | Ti | 0.72414 | 0.19268 | 0.96427 | 0.00000 | Uiso | 1.00 |
| Ti256 | Ti | 0.56587 | 0.06133 | 0.87388 | 0.00000 | Uiso | 1.00 |
| O257  | O  | 0.73694 | 0.06270 | 0.97157 | 0.00000 | Uiso | 1.00 |
| O258  | O  | 0.57752 | 0.18583 | 0.85600 | 0.00000 | Uiso | 1.00 |
| O259  | O  | 0.67545 | 0.17457 | 0.97795 | 0.00000 | Uiso | 1.00 |
| O260  | O  | 0.51574 | 0.04186 | 0.88474 | 0.00000 | Uiso | 1.00 |
| O261  | O  | 0.61267 | 0.06046 | 0.88734 | 0.00000 | Uiso | 1.00 |
| O262  | O  | 0.77598 | 0.19233 | 0.97467 | 0.00000 | Uiso | 1.00 |
| O263  | O  | 0.67311 | 0.16019 | 0.85450 | 0.00000 | Uiso | 1.00 |
| O264  | O  | 0.61603 | 0.03724 | 0.98091 | 0.00000 | Uiso | 1.00 |
| Ti265 | Ti | 0.75585 | 0.31136 | 0.88873 | 0.00000 | Uiso | 1.00 |
| Ti266 | Ti | 0.65058 | 0.43438 | 0.93692 | 0.00000 | Uiso | 1.00 |
| Ti267 | Ti | 0.69526 | 0.43360 | 0.89021 | 0.00000 | Uiso | 1.00 |
| Ti268 | Ti | 0.59131 | 0.31361 | 0.95002 | 0.00000 | Uiso | 1.00 |
| O269  | O  | 0.70423 | 0.31170 | 0.87827 | 0.00000 | Uiso | 1.00 |
| O270  | O  | 0.59667 | 0.43928 | 0.93737 | 0.00000 | Uiso | 1.00 |
| O271  | O  | 0.64832 | 0.40111 | 0.90019 | 0.00000 | Uiso | 1.00 |
| O272  | O  | 0.53815 | 0.30190 | 0.95883 | 0.00000 | Uiso | 1.00 |
| O273  | O  | 0.64366 | 0.31562 | 0.94809 | 0.00000 | Uiso | 1.00 |
| O274  | O  | 0.74320 | 0.44155 | 0.88058 | 0.00000 | Uiso | 1.00 |
| O275  | O  | 0.70022 | 0.40113 | 0.92705 | 0.00000 | Uiso | 1.00 |
| O276  | O  | 0.56718 | 0.28666 | 0.91427 | 0.00000 | Uiso | 1.00 |
| Ti277 | Ti | 0.78480 | 0.31520 | 0.96272 | 0.00000 | Uiso | 1.00 |
| Ti278 | Ti | 0.62785 | 0.44465 | 0.86890 | 0.00000 | Uiso | 1.00 |
| Ti279 | Ti | 0.72564 | 0.44070 | 0.95776 | 0.00000 | Uiso | 1.00 |

|       |    |         |         |         |         |      |      |
|-------|----|---------|---------|---------|---------|------|------|
| Ti280 | Ti | 0.56954 | 0.31181 | 0.87444 | 0.00000 | Uiso | 1.00 |
| O281  | O  | 0.73711 | 0.32262 | 0.97582 | 0.00000 | Uiso | 1.00 |
| O282  | O  | 0.58002 | 0.43698 | 0.85680 | 0.00000 | Uiso | 1.00 |
| O283  | O  | 0.67629 | 0.46060 | 0.97195 | 0.00000 | Uiso | 1.00 |
| O284  | O  | 0.52133 | 0.34397 | 0.88255 | 0.00000 | Uiso | 1.00 |
| O285  | O  | 0.61745 | 0.31399 | 0.88223 | 0.00000 | Uiso | 1.00 |
| O286  | O  | 0.77845 | 0.44249 | 0.94876 | 0.00000 | Uiso | 1.00 |
| O287  | O  | 0.67537 | 0.46515 | 0.85380 | 0.00000 | Uiso | 1.00 |
| O288  | O  | 0.60398 | 0.34193 | 0.98796 | 0.00000 | Uiso | 1.00 |
| Ti289 | Ti | 0.51969 | 0.06866 | 0.92438 | 0.00000 | Uiso | 1.00 |
| Ti290 | Ti | 0.40968 | 0.19781 | 0.97507 | 0.00000 | Uiso | 1.00 |
| Ti291 | Ti | 0.45685 | 0.18495 | 0.92966 | 0.00000 | Uiso | 1.00 |
| Ti292 | Ti | 0.35376 | 0.06663 | 0.98808 | 0.00000 | Uiso | 1.00 |
| O293  | O  | 0.47095 | 0.06482 | 0.93909 | 0.00000 | Uiso | 1.00 |
| O294  | O  | 0.37115 | 0.19263 | 1.00284 | 0.00000 | Uiso | 1.00 |
| O295  | O  | 0.40664 | 0.16014 | 0.93841 | 0.00000 | Uiso | 1.00 |
| O296  | O  | 0.30484 | 0.04011 | 0.99845 | 0.00000 | Uiso | 1.00 |
| O297  | O  | 0.39515 | 0.06574 | 0.96634 | 0.00000 | Uiso | 1.00 |
| O298  | O  | 0.50656 | 0.18942 | 0.91588 | 0.00000 | Uiso | 1.00 |
| O299  | O  | 0.46117 | 0.21098 | 0.96983 | 0.00000 | Uiso | 1.00 |
| O300  | O  | 0.33367 | 0.09313 | 0.95165 | 0.00000 | Uiso | 1.00 |
| Ti301 | Ti | 0.48363 | 0.06273 | 0.85322 | 0.00000 | Uiso | 1.00 |
| Ti302 | Ti | 0.38667 | 0.18483 | 0.90231 | 0.00000 | Uiso | 1.00 |
| Ti303 | Ti | 0.43079 | 0.19424 | 0.85838 | 0.00000 | Uiso | 1.00 |
| Ti304 | Ti | 0.32634 | 0.06814 | 0.91278 | 0.00000 | Uiso | 1.00 |
| O305  | O  | 0.43245 | 0.06105 | 0.84858 | 0.00000 | Uiso | 1.00 |
| O306  | O  | 0.33526 | 0.19123 | 0.90522 | 0.00000 | Uiso | 1.00 |
| O307  | O  | 0.38132 | 0.21036 | 0.86278 | 0.00000 | Uiso | 1.00 |
| O308  | O  | 0.27661 | 0.09366 | 0.92465 | 0.00000 | Uiso | 1.00 |
| O309  | O  | 0.37478 | 0.06316 | 0.89754 | 0.00000 | Uiso | 1.00 |
| O310  | O  | 0.47592 | 0.19174 | 0.83948 | 0.00000 | Uiso | 1.00 |
| O311  | O  | 0.43623 | 0.15374 | 0.89456 | 0.00000 | Uiso | 1.00 |
| O312  | O  | 0.30423 | 0.04731 | 0.87595 | 0.00000 | Uiso | 1.00 |
| Ti313 | Ti | 0.51663 | 0.31143 | 0.92123 | 0.00000 | Uiso | 1.00 |
| Ti314 | Ti | 0.41046 | 0.43614 | 0.97542 | 0.00000 | Uiso | 1.00 |
| Ti315 | Ti | 0.46074 | 0.44428 | 0.93229 | 0.00000 | Uiso | 1.00 |
| Ti316 | Ti | 0.35197 | 0.31724 | 0.98949 | 0.00000 | Uiso | 1.00 |
| O317  | O  | 0.46191 | 0.31666 | 0.92312 | 0.00000 | Uiso | 1.00 |
| O318  | O  | 0.37194 | 0.44146 | 1.00104 | 0.00000 | Uiso | 1.00 |
| O319  | O  | 0.41102 | 0.47193 | 0.93931 | 0.00000 | Uiso | 1.00 |
| O320  | O  | 0.30176 | 0.33991 | 0.99892 | 0.00000 | Uiso | 1.00 |
| O321  | O  | 0.38987 | 0.31868 | 0.96324 | 0.00000 | Uiso | 1.00 |
| O322  | O  | 0.51474 | 0.43815 | 0.92954 | 0.00000 | Uiso | 1.00 |
| O323  | O  | 0.46137 | 0.42046 | 0.97286 | 0.00000 | Uiso | 1.00 |
| O324  | O  | 0.33225 | 0.28283 | 0.95472 | 0.00000 | Uiso | 1.00 |
| Ti325 | Ti | 0.48838 | 0.31411 | 0.85476 | 0.00000 | Uiso | 1.00 |
| Ti326 | Ti | 0.38631 | 0.44388 | 0.90663 | 0.00000 | Uiso | 1.00 |
| Ti327 | Ti | 0.42855 | 0.43091 | 0.86021 | 0.00000 | Uiso | 1.00 |
| Ti328 | Ti | 0.33100 | 0.31032 | 0.91620 | 0.00000 | Uiso | 1.00 |
| O329  | O  | 0.44585 | 0.31187 | 0.87414 | 0.00000 | Uiso | 1.00 |
| O330  | O  | 0.33593 | 0.43937 | 0.92278 | 0.00000 | Uiso | 1.00 |



|       |    |         |         |         |         |      |      |
|-------|----|---------|---------|---------|---------|------|------|
| O331  | O  | 0.37812 | 0.41783 | 0.86744 | 0.00000 | Uiso | 1.00 |
| O332  | O  | 0.28109 | 0.28217 | 0.92470 | 0.00000 | Uiso | 1.00 |
| O333  | O  | 0.38532 | 0.31419 | 0.91224 | 0.00000 | Uiso | 1.00 |
| O334  | O  | 0.47161 | 0.43073 | 0.83811 | 0.00000 | Uiso | 1.00 |
| O335  | O  | 0.43650 | 0.47193 | 0.89636 | 0.00000 | Uiso | 1.00 |
| O336  | O  | 0.31009 | 0.33557 | 0.87962 | 0.00000 | Uiso | 1.00 |
| Ti337 | Ti | 0.28556 | 0.06659 | 0.96233 | 0.00000 | Uiso | 1.00 |
| Ti338 | Ti | 0.13106 | 0.18998 | 0.86570 | 0.00000 | Uiso | 1.00 |
| Ti339 | Ti | 0.22285 | 0.18549 | 0.96379 | 0.00000 | Uiso | 1.00 |
| Ti340 | Ti | 0.07193 | 0.06368 | 0.87315 | 0.00000 | Uiso | 1.00 |
| O341  | O  | 0.23871 | 0.05835 | 0.97497 | 0.00000 | Uiso | 1.00 |
| O342  | O  | 0.08227 | 0.18948 | 0.85573 | 0.00000 | Uiso | 1.00 |
| O343  | O  | 0.17206 | 0.17371 | 0.97501 | 0.00000 | Uiso | 1.00 |
| O344  | O  | 0.02309 | 0.09427 | 0.88137 | 0.00000 | Uiso | 1.00 |
| O345  | O  | 0.12099 | 0.06437 | 0.88120 | 0.00000 | Uiso | 1.00 |
| O346  | O  | 0.27501 | 0.18818 | 0.97367 | 0.00000 | Uiso | 1.00 |
| O347  | O  | 0.17849 | 0.21410 | 0.85101 | 0.00000 | Uiso | 1.00 |
| O348  | O  | 0.11283 | 0.09140 | 0.98170 | 0.00000 | Uiso | 1.00 |
| Ti349 | Ti | 0.25484 | 0.06556 | 0.88889 | 0.00000 | Uiso | 1.00 |
| Ti350 | Ti | 0.15246 | 0.18592 | 0.93631 | 0.00000 | Uiso | 1.00 |
| Ti351 | Ti | 0.19810 | 0.19641 | 0.88868 | 0.00000 | Uiso | 1.00 |
| Ti352 | Ti | 0.09374 | 0.06475 | 0.94576 | 0.00000 | Uiso | 1.00 |
| O353  | O  | 0.20098 | 0.06567 | 0.88082 | 0.00000 | Uiso | 1.00 |
| O354  | O  | 0.09854 | 0.19205 | 0.93736 | 0.00000 | Uiso | 1.00 |
| O355  | O  | 0.15091 | 0.21254 | 0.89938 | 0.00000 | Uiso | 1.00 |
| O356  | O  | 0.04210 | 0.05612 | 0.95837 | 0.00000 | Uiso | 1.00 |
| O357  | O  | 0.14202 | 0.06516 | 0.93035 | 0.00000 | Uiso | 1.00 |
| O358  | O  | 0.24581 | 0.19288 | 0.87520 | 0.00000 | Uiso | 1.00 |
| O359  | O  | 0.20376 | 0.16513 | 0.92716 | 0.00000 | Uiso | 1.00 |
| O360  | O  | 0.06732 | 0.03771 | 0.91231 | 0.00000 | Uiso | 1.00 |
| Ti361 | Ti | 0.28422 | 0.31095 | 0.96244 | 0.00000 | Uiso | 1.00 |
| Ti362 | Ti | 0.12940 | 0.43648 | 0.86593 | 0.00000 | Uiso | 1.00 |
| Ti363 | Ti | 0.22681 | 0.44198 | 0.95768 | 0.00000 | Uiso | 1.00 |
| Ti364 | Ti | 0.07006 | 0.31348 | 0.87318 | 0.00000 | Uiso | 1.00 |
| O365  | O  | 0.23523 | 0.31775 | 0.97131 | 0.00000 | Uiso | 1.00 |
| O366  | O  | 0.07966 | 0.43778 | 0.85444 | 0.00000 | Uiso | 1.00 |
| O367  | O  | 0.17890 | 0.45732 | 0.97458 | 0.00000 | Uiso | 1.00 |
| O368  | O  | 0.02085 | 0.28870 | 0.88324 | 0.00000 | Uiso | 1.00 |
| O369  | O  | 0.11756 | 0.31194 | 0.88208 | 0.00000 | Uiso | 1.00 |
| O370  | O  | 0.27952 | 0.43942 | 0.94924 | 0.00000 | Uiso | 1.00 |
| O371  | O  | 0.17711 | 0.41413 | 0.85159 | 0.00000 | Uiso | 1.00 |
| O372  | O  | 0.11268 | 0.29000 | 0.98516 | 0.00000 | Uiso | 1.00 |
| Ti373 | Ti | 0.25928 | 0.31570 | 0.89110 | 0.00000 | Uiso | 1.00 |
| Ti374 | Ti | 0.15415 | 0.44673 | 0.93896 | 0.00000 | Uiso | 1.00 |
| Ti375 | Ti | 0.19603 | 0.43507 | 0.88918 | 0.00000 | Uiso | 1.00 |
| Ti376 | Ti | 0.09706 | 0.31684 | 0.94792 | 0.00000 | Uiso | 1.00 |
| O377  | O  | 0.20854 | 0.31613 | 0.90161 | 0.00000 | Uiso | 1.00 |
| O378  | O  | 0.10535 | 0.44112 | 0.95464 | 0.00000 | Uiso | 1.00 |
| O379  | O  | 0.14735 | 0.42074 | 0.90132 | 0.00000 | Uiso | 1.00 |
| O380  | O  | 0.04540 | 0.32694 | 0.95973 | 0.00000 | Uiso | 1.00 |
| O381  | O  | 0.15079 | 0.31568 | 0.94188 | 0.00000 | Uiso | 1.00 |

|      |   |          |          |         |         |      |      |
|------|---|----------|----------|---------|---------|------|------|
| O382 | O | 0.24396  | 0.43864  | 0.87808 | 0.00000 | Uiso | 1.00 |
| O383 | O | 0.20211  | 0.47003  | 0.92542 | 0.00000 | Uiso | 1.00 |
| O384 | O | 0.07098  | 0.34220  | 0.91255 | 0.00000 | Uiso | 1.00 |
| C385 | C | -0.61096 | -0.11462 | 0.47236 | 0.00000 | Uiso | 1.00 |
| C386 | C | -0.60917 | -0.13387 | 0.49703 | 0.00000 | Uiso | 1.00 |
| C387 | C | -0.60699 | -0.15458 | 0.52424 | 0.00000 | Uiso | 1.00 |
| C388 | C | -0.60481 | -0.17300 | 0.54909 | 0.00000 | Uiso | 1.00 |
| C389 | C | -0.60222 | -0.19252 | 0.57616 | 0.00000 | Uiso | 1.00 |
| C390 | C | -0.59969 | -0.20993 | 0.60102 | 0.00000 | Uiso | 1.00 |
| C391 | C | -0.59678 | -0.22839 | 0.62821 | 0.00000 | Uiso | 1.00 |
| C392 | C | -0.59404 | -0.24481 | 0.65311 | 0.00000 | Uiso | 1.00 |
| C393 | C | -0.59089 | -0.26261 | 0.68098 | 0.00000 | Uiso | 1.00 |
| C394 | C | -0.58509 | -0.34285 | 0.69103 | 0.00000 | Uiso | 1.00 |
| S395 | S | -0.59375 | -0.17852 | 0.70755 | 0.00000 | Uiso | 1.00 |
| C396 | C | -0.58245 | -0.34535 | 0.71995 | 0.00000 | Uiso | 1.00 |
| H397 | H | -0.58250 | -0.40111 | 0.67791 | 0.00000 | Uiso | 1.00 |
| C398 | C | -0.58629 | -0.26707 | 0.73254 | 0.00000 | Uiso | 1.00 |
| H399 | H | -0.57752 | -0.40639 | 0.73122 | 0.00000 | Uiso | 1.00 |
| C400 | C | -0.58335 | -0.25857 | 0.76199 | 0.00000 | Uiso | 1.00 |
| H401 | H | -0.57696 | -0.31913 | 0.77306 | 0.00000 | Uiso | 1.00 |
| C402 | C | -0.58701 | -0.18395 | 0.77777 | 0.00000 | Uiso | 1.00 |
| C403 | C | -0.59630 | -0.10375 | 0.76665 | 0.00000 | Uiso | 1.00 |
| C404 | C | -0.58033 | -0.18594 | 0.80863 | 0.00000 | Uiso | 1.00 |
| O405 | O | -0.57364 | -0.26115 | 0.82004 | 0.00000 | Uiso | 1.00 |
| O406 | O | -0.58076 | -0.11461 | 0.82111 | 0.00000 | Uiso | 1.00 |
| N407 | N | -0.60415 | -0.03446 | 0.75812 | 0.00000 | Uiso | 1.00 |
| C408 | C | -0.61278 | -0.09258 | 0.44480 | 0.00000 | Uiso | 1.00 |
| C409 | C | -0.62614 | -0.01699 | 0.43580 | 0.00000 | Uiso | 1.00 |
| S410 | S | -0.59631 | -0.16254 | 0.41726 | 0.00000 | Uiso | 1.00 |
| C411 | C | -0.62476 | -0.00750 | 0.40696 | 0.00000 | Uiso | 1.00 |
| H412 | H | -0.63686 | 0.03296  | 0.44963 | 0.00000 | Uiso | 1.00 |
| C413 | C | -0.61060 | -0.07598 | 0.39377 | 0.00000 | Uiso | 1.00 |
| H414 | H | -0.63424 | 0.05071  | 0.39618 | 0.00000 | Uiso | 1.00 |
| H415 | H | -0.61162 | -0.01986 | 0.35398 | 0.00000 | Uiso | 1.00 |
| C416 | C | -0.59200 | -0.15017 | 0.35029 | 0.00000 | Uiso | 1.00 |
| C417 | C | -0.57428 | -0.14370 | 0.32660 | 0.00000 | Uiso | 1.00 |
| C418 | C | -0.56949 | -0.22912 | 0.31671 | 0.00000 | Uiso | 1.00 |
| H419 | H | -0.56578 | -0.08309 | 0.31671 | 0.00000 | Uiso | 1.00 |
| C420 | C | -0.58509 | -0.28451 | 0.33434 | 0.00000 | Uiso | 1.00 |
| H421 | H | -0.55591 | -0.24768 | 0.29772 | 0.00000 | Uiso | 1.00 |
| H422 | H | -0.58614 | -0.35582 | 0.33195 | 0.00000 | Uiso | 1.00 |
| N423 | N | -0.60595 | -0.07685 | 0.36548 | 0.00000 | Uiso | 1.00 |
| N424 | N | -0.60005 | -0.23990 | 0.35559 | 0.00000 | Uiso | 1.00 |
| H425 | H | -0.61478 | -0.26568 | 0.37203 | 0.00000 | Uiso | 1.00 |
| H426 | H | 0.36044  | 0.72847  | 0.85077 | 0.00000 | Uiso | 1.00 |

loop\_

\_geom\_bond\_atom\_site\_label\_1

\_geom\_bond\_atom\_site\_label\_2

\_geom\_bond\_distance

\_geom\_bond\_site\_symmetry\_2

\_ccdc\_geom\_bond\_type

|      |       |       |       |   |
|------|-------|-------|-------|---|
| Ti1  | O5    | 1.900 | 1_455 | S |
| Ti1  | O10   | 2.103 | 1_455 | S |
| Ti1  | O152  | 1.919 | .     | S |
| Ti1  | O226  | 2.093 | 1_455 | S |
| Ti2  | O6    | 2.007 | .     | S |
| Ti2  | O11   | 2.019 | .     | S |
| Ti2  | O9    | 2.010 | .     | S |
| Ti2  | O19   | 1.924 | .     | S |
| Ti2  | O7    | 1.941 | .     | S |
| Ti2  | O33   | 1.925 | .     | S |
| Ti3  | O7    | 1.946 | .     | S |
| Ti3  | O10   | 1.938 | .     | S |
| Ti3  | O5    | 2.030 | .     | S |
| Ti3  | O29   | 2.085 | .     | S |
| Ti3  | O11   | 1.828 | .     | S |
| Ti4  | O8    | 2.028 | .     | S |
| Ti4  | O9    | 2.109 | .     | S |
| Ti4  | O24   | 1.874 | .     | S |
| Ti4  | O6    | 1.877 | .     | S |
| Ti4  | O222  | 1.987 | .     | S |
| Ti4  | O12   | 1.973 | .     | S |
| O5   | Ti1   | 1.900 | 1_655 | S |
| O5   | Ti219 | 2.046 | .     | S |
| O6   | Ti28  | 1.918 | .     | S |
| O8   | Ti61  | 1.826 | .     | S |
| O8   | Ti49  | 1.872 | .     | S |
| O9   | Ti218 | 1.966 | .     | S |
| O10  | Ti1   | 2.103 | 1_655 | S |
| O10  | Ti25  | 2.117 | 1_655 | S |
| O11  | Ti15  | 1.942 | .     | S |
| O12  | Ti49  | 2.076 | .     | S |
| Ti13 | O17   | 2.121 | 1_455 | S |
| Ti13 | O168  | 2.006 | .     | S |
| Ti13 | O22   | 1.957 | .     | S |
| Ti13 | O152  | 1.946 | .     | S |
| Ti13 | O164  | 2.028 | .     | S |
| Ti13 | O238  | 1.903 | .     | S |
| Ti14 | O18   | 1.988 | .     | S |
| Ti14 | O23   | 1.997 | .     | S |
| Ti14 | O21   | 2.057 | .     | S |
| Ti14 | O19   | 1.834 | .     | S |
| Ti14 | O45   | 2.107 | .     | S |
| Ti15 | O19   | 2.035 | .     | S |
| Ti15 | O22   | 2.108 | 1_655 | S |
| Ti15 | O17   | 1.971 | .     | S |
| Ti15 | O41   | 1.895 | .     | S |
| Ti15 | O23   | 1.970 | .     | S |
| Ti16 | O20   | 2.020 | .     | S |
| Ti16 | O21   | 1.928 | .     | S |
| Ti16 | O18   | 2.123 | .     | S |
| Ti16 | O234  | 2.097 | .     | S |

|      |       |       |       |   |
|------|-------|-------|-------|---|
| Ti16 | O24   | 1.893 | .     | S |
| O17  | Ti13  | 2.121 | 1_655 | S |
| O17  | Ti231 | 2.008 | .     | S |
| O18  | Ti40  | 2.138 | .     | S |
| O20  | Ti61  | 1.909 | .     | S |
| O21  | Ti230 | 2.037 | .     | S |
| O22  | Ti15  | 2.108 | 1_455 | S |
| O22  | Ti37  | 1.996 | .     | S |
| O24  | Ti61  | 1.934 | .     | S |
| Ti25 | O29   | 1.895 | 1_455 | S |
| Ti25 | O34   | 2.111 | 1_455 | S |
| Ti25 | O176  | 1.950 | .     | S |
| Ti25 | O10   | 2.117 | 1_455 | S |
| Ti26 | O30   | 2.098 | .     | S |
| Ti26 | O35   | 1.994 | .     | S |
| Ti26 | O33   | 1.884 | .     | S |
| Ti26 | O43   | 1.898 | .     | S |
| Ti26 | O31   | 1.956 | .     | S |
| Ti26 | O201  | 1.966 | 1_565 | S |
| Ti27 | O31   | 2.020 | .     | S |
| Ti27 | O34   | 1.978 | .     | S |
| Ti27 | O29   | 2.103 | .     | S |
| Ti27 | O197  | 2.046 | 1_565 | S |
| Ti27 | O35   | 1.804 | .     | S |
| Ti28 | O32   | 2.046 | .     | S |
| Ti28 | O33   | 2.002 | .     | S |
| Ti28 | O48   | 1.905 | .     | S |
| Ti28 | O30   | 2.033 | .     | S |
| Ti28 | O36   | 1.974 | .     | S |
| O29  | Ti25  | 1.895 | 1_655 | S |
| O30  | Ti196 | 1.987 | 1_565 | S |
| O32  | Ti85  | 1.884 | .     | S |
| O32  | Ti73  | 1.937 | .     | S |
| O34  | Ti25  | 2.111 | 1_655 | S |
| O34  | Ti193 | 2.093 | 1_665 | S |
| O35  | Ti39  | 1.901 | .     | S |
| O36  | Ti73  | 2.013 | .     | S |
| Ti37 | O41   | 2.033 | 1_455 | S |
| Ti37 | O192  | 2.004 | .     | S |
| Ti37 | O46   | 1.950 | .     | S |
| Ti37 | O176  | 1.952 | .     | S |
| Ti37 | O188  | 1.967 | .     | S |
| Ti38 | O42   | 1.939 | .     | S |
| Ti38 | O47   | 2.026 | .     | S |
| Ti38 | O45   | 2.097 | .     | S |
| Ti38 | O43   | 1.795 | .     | S |
| Ti38 | O213  | 2.037 | 1_565 | S |
| Ti39 | O43   | 1.996 | .     | S |
| Ti39 | O46   | 2.041 | 1_655 | S |
| Ti39 | O41   | 1.930 | .     | S |
| Ti39 | O209  | 2.008 | 1_565 | S |

|      |       |       |       |   |
|------|-------|-------|-------|---|
| Ti39 | O47   | 1.957 | .     | S |
| Ti40 | O44   | 2.004 | .     | S |
| Ti40 | O45   | 1.908 | .     | S |
| Ti40 | O42   | 2.115 | .     | S |
| Ti40 | O48   | 1.941 | .     | S |
| O41  | Ti37  | 2.033 | 1_655 | S |
| O42  | Ti208 | 2.097 | 1_565 | S |
| O44  | Ti85  | 1.918 | .     | S |
| O46  | Ti39  | 2.041 | 1_455 | S |
| O46  | Ti205 | 1.903 | 1_565 | S |
| O48  | Ti85  | 1.972 | .     | S |
| Ti49 | O53   | 2.097 | .     | S |
| Ti49 | O58   | 2.035 | .     | S |
| Ti49 | O274  | 2.011 | .     | S |
| Ti50 | O54   | 2.035 | .     | S |
| Ti50 | O59   | 2.061 | .     | S |
| Ti50 | O57   | 2.036 | .     | S |
| Ti50 | O67   | 1.977 | .     | S |
| Ti50 | O55   | 1.855 | .     | S |
| Ti50 | O81   | 1.913 | .     | S |
| Ti51 | O55   | 1.997 | .     | S |
| Ti51 | O58   | 1.965 | .     | S |
| Ti51 | O71   | 1.962 | .     | S |
| Ti51 | O53   | 2.065 | .     | S |
| Ti51 | O77   | 1.970 | .     | S |
| Ti51 | O59   | 1.885 | .     | S |
| Ti52 | O56   | 2.074 | .     | S |
| Ti52 | O57   | 2.098 | .     | S |
| Ti52 | O72   | 1.903 | .     | S |
| Ti52 | O54   | 1.932 | .     | S |
| Ti52 | O270  | 1.937 | .     | S |
| Ti52 | O60   | 1.965 | .     | S |
| O53  | Ti267 | 2.059 | .     | S |
| O54  | Ti76  | 1.983 | .     | S |
| O55  | Ti62  | 1.857 | .     | S |
| O56  | Ti97  | 1.992 | .     | S |
| O57  | Ti266 | 2.013 | .     | S |
| O58  | Ti73  | 2.103 | .     | S |
| O59  | Ti63  | 1.927 | .     | S |
| O60  | Ti97  | 1.964 | .     | S |
| O60  | Ti64  | 1.885 | .     | S |
| Ti61 | O65   | 1.903 | .     | S |
| Ti61 | O70   | 1.966 | .     | S |
| Ti61 | O286  | 2.048 | .     | S |
| Ti62 | O66   | 2.007 | .     | S |
| Ti62 | O71   | 1.987 | .     | S |
| Ti62 | O69   | 2.059 | .     | S |
| Ti62 | O93   | 2.128 | .     | S |
| Ti63 | O67   | 2.010 | .     | S |
| Ti63 | O70   | 2.065 | .     | S |
| Ti63 | O65   | 2.054 | .     | S |

|      |       |       |       |   |
|------|-------|-------|-------|---|
| Ti63 | O89   | 2.099 | .     | S |
| Ti64 | O68   | 2.032 | .     | S |
| Ti64 | O69   | 1.920 | .     | S |
| Ti64 | O66   | 2.116 | .     | S |
| Ti64 | O282  | 2.100 | .     | S |
| O65  | Ti279 | 2.003 | .     | S |
| O66  | Ti88  | 2.124 | .     | S |
| O68  | Ti97  | 1.950 | .     | S |
| O68  | Ti109 | 1.973 | .     | S |
| O69  | Ti278 | 2.033 | .     | S |
| O70  | Ti85  | 1.971 | .     | S |
| Ti73 | O77   | 2.059 | .     | S |
| Ti73 | O82   | 2.063 | .     | S |
| Ti74 | O78   | 2.087 | .     | S |
| Ti74 | O83   | 2.039 | .     | S |
| Ti74 | O81   | 1.891 | .     | S |
| Ti74 | O91   | 1.978 | .     | S |
| Ti74 | O79   | 1.817 | .     | S |
| Ti74 | O249  | 2.015 | 1_565 | S |
| Ti75 | O79   | 1.941 | .     | S |
| Ti75 | O82   | 1.915 | .     | S |
| Ti75 | O95   | 1.954 | .     | S |
| Ti75 | O77   | 1.958 | .     | S |
| Ti75 | O245  | 2.060 | 1_565 | S |
| Ti75 | O83   | 1.828 | .     | S |
| Ti76 | O80   | 2.101 | .     | S |
| Ti76 | O81   | 2.025 | .     | S |
| Ti76 | O96   | 1.917 | .     | S |
| Ti76 | O78   | 2.003 | .     | S |
| Ti76 | O84   | 1.975 | .     | S |
| O78  | Ti244 | 1.940 | 1_565 | S |
| O79  | Ti86  | 1.810 | .     | S |
| O80  | Ti121 | 1.972 | .     | S |
| O82  | Ti241 | 2.012 | 1_565 | S |
| O83  | Ti87  | 1.858 | .     | S |
| O84  | Ti121 | 2.015 | .     | S |
| O84  | Ti88  | 1.930 | .     | S |
| Ti85 | O89   | 1.950 | .     | S |
| Ti85 | O94   | 2.049 | .     | S |
| Ti86 | O90   | 1.944 | .     | S |
| Ti86 | O95   | 1.999 | .     | S |
| Ti86 | O93   | 2.112 | .     | S |
| Ti86 | O261  | 2.034 | 1_565 | S |
| Ti87 | O91   | 2.047 | .     | S |
| Ti87 | O94   | 2.087 | .     | S |
| Ti87 | O89   | 2.029 | .     | S |
| Ti87 | O257  | 2.003 | 1_565 | S |
| Ti88 | O92   | 1.968 | .     | S |
| Ti88 | O93   | 1.891 | .     | S |
| Ti88 | O90   | 2.110 | .     | S |
| O90  | Ti256 | 2.104 | 1_565 | S |

|       |       |       |       |   |
|-------|-------|-------|-------|---|
| O92   | Ti121 | 1.858 | .     | S |
| O92   | Ti133 | 1.845 | .     | S |
| O94   | Ti253 | 2.048 | 1_565 | S |
| Ti97  | O101  | 2.010 | .     | S |
| Ti97  | O106  | 1.944 | .     | S |
| Ti97  | O322  | 1.981 | .     | S |
| Ti98  | O102  | 1.995 | .     | S |
| Ti98  | O107  | 2.021 | .     | S |
| Ti98  | O105  | 2.115 | .     | S |
| Ti98  | O103  | 1.833 | .     | S |
| Ti98  | O129  | 2.060 | .     | S |
| Ti99  | O103  | 2.015 | .     | S |
| Ti99  | O106  | 2.030 | .     | S |
| Ti99  | O119  | 1.909 | .     | S |
| Ti99  | O101  | 1.944 | .     | S |
| Ti99  | O125  | 2.027 | .     | S |
| Ti99  | O107  | 1.957 | .     | S |
| Ti100 | O104  | 1.998 | .     | S |
| Ti100 | O105  | 1.906 | .     | S |
| Ti100 | O102  | 2.138 | .     | S |
| Ti100 | O318  | 2.112 | .     | S |
| Ti100 | O108  | 1.938 | .     | S |
| O101  | Ti315 | 1.890 | .     | S |
| O102  | Ti124 | 2.118 | .     | S |
| O103  | Ti110 | 1.902 | .     | S |
| O104  | Ti145 | 1.914 | .     | S |
| O105  | Ti314 | 2.090 | .     | S |
| O106  | Ti121 | 1.911 | .     | S |
| O108  | Ti145 | 1.969 | .     | S |
| O108  | Ti112 | 1.903 | .     | S |
| Ti109 | O113  | 1.983 | .     | S |
| Ti109 | O118  | 2.043 | .     | S |
| Ti109 | O334  | 2.086 | .     | S |
| Ti110 | O114  | 2.005 | .     | S |
| Ti110 | O119  | 2.023 | .     | S |
| Ti110 | O117  | 1.913 | .     | S |
| Ti110 | O141  | 2.027 | .     | S |
| Ti110 | O115  | 1.866 | .     | S |
| Ti111 | O115  | 1.966 | .     | S |
| Ti111 | O118  | 1.951 | .     | S |
| Ti111 | O113  | 2.064 | .     | S |
| Ti111 | O137  | 1.940 | .     | S |
| Ti111 | O119  | 1.871 | .     | S |
| Ti111 | O405  | 1.893 | 1_665 | S |
| Ti112 | O116  | 2.040 | .     | S |
| Ti112 | O117  | 2.004 | .     | S |
| Ti112 | O114  | 1.926 | .     | S |
| Ti112 | O330  | 2.037 | .     | S |
| Ti112 | O120  | 1.973 | .     | S |
| O113  | Ti327 | 2.082 | .     | S |
| O114  | Ti136 | 1.882 | .     | S |

|       |       |       |       |   |
|-------|-------|-------|-------|---|
| O115  | H426  | 1.140 | .     | S |
| O116  | Ti145 | 1.871 | .     | S |
| O116  | Ti157 | 1.944 | .     | S |
| O117  | Ti326 | 1.883 | .     | S |
| O118  | Ti133 | 2.005 | .     | S |
| O120  | Ti157 | 2.025 | .     | S |
| Ti121 | O125  | 2.116 | .     | S |
| Ti121 | O130  | 1.955 | .     | S |
| Ti122 | O126  | 1.927 | .     | S |
| Ti122 | O131  | 1.989 | .     | S |
| Ti122 | O129  | 2.030 | .     | S |
| Ti122 | O127  | 1.800 | .     | S |
| Ti122 | O297  | 2.091 | 1_565 | S |
| Ti123 | O127  | 1.986 | .     | S |
| Ti123 | O130  | 2.092 | .     | S |
| Ti123 | O143  | 2.002 | .     | S |
| Ti123 | O125  | 1.983 | .     | S |
| Ti123 | O293  | 1.890 | 1_565 | S |
| Ti123 | O131  | 1.961 | .     | S |
| Ti124 | O128  | 2.023 | .     | S |
| Ti124 | O129  | 1.927 | .     | S |
| Ti124 | O126  | 2.099 | .     | S |
| Ti124 | O132  | 1.890 | .     | S |
| O126  | Ti292 | 2.111 | 1_565 | S |
| O127  | Ti134 | 1.854 | .     | S |
| O128  | Ti169 | 1.912 | .     | S |
| O130  | Ti289 | 1.990 | 1_565 | S |
| O132  | Ti169 | 1.944 | .     | S |
| O132  | Ti136 | 1.880 | .     | S |
| Ti133 | O137  | 1.926 | .     | S |
| Ti133 | O142  | 2.006 | .     | S |
| Ti134 | O138  | 2.108 | .     | S |
| Ti134 | O143  | 2.075 | .     | S |
| Ti134 | O141  | 1.996 | .     | S |
| Ti134 | O139  | 1.864 | .     | S |
| Ti134 | O309  | 1.905 | 1_565 | S |
| Ti135 | O139  | 2.012 | .     | S |
| Ti135 | O142  | 1.942 | .     | S |
| Ti135 | O137  | 1.942 | .     | S |
| Ti135 | O305  | 2.061 | 1_565 | S |
| Ti135 | O143  | 1.906 | .     | S |
| Ti135 | O406  | 1.892 | 1_665 | S |
| Ti136 | O140  | 2.023 | .     | S |
| Ti136 | O141  | 2.119 | .     | S |
| Ti136 | O138  | 1.988 | .     | S |
| Ti136 | O144  | 1.958 | .     | S |
| O138  | Ti304 | 2.040 | 1_565 | S |
| O140  | Ti169 | 1.849 | .     | S |
| O140  | Ti181 | 1.878 | .     | S |
| O142  | Ti301 | 2.050 | 1_565 | S |
| O144  | Ti181 | 2.068 | .     | S |



|       |       |       |   |   |
|-------|-------|-------|---|---|
| Ti145 | O149  | 1.913 | . | S |
| Ti145 | O154  | 1.955 | . | S |
| Ti145 | O370  | 2.034 | . | S |
| Ti146 | O150  | 1.947 | . | S |
| Ti146 | O155  | 1.998 | . | S |
| Ti146 | O153  | 2.072 | . | S |
| Ti146 | O163  | 1.808 | . | S |
| Ti146 | O177  | 2.067 | . | S |
| Ti147 | O151  | 2.044 | . | S |
| Ti147 | O154  | 2.074 | . | S |
| Ti147 | O167  | 1.915 | . | S |
| Ti147 | O149  | 2.083 | . | S |
| Ti147 | O173  | 2.084 | . | S |
| Ti148 | O152  | 1.984 | . | S |
| Ti148 | O153  | 1.936 | . | S |
| Ti148 | O168  | 1.910 | . | S |
| Ti148 | O150  | 2.111 | . | S |
| Ti148 | O366  | 2.121 | . | S |
| O149  | Ti363 | 1.999 | . | S |
| O150  | Ti172 | 2.102 | . | S |
| O151  | Ti158 | 1.998 | . | S |
| O153  | Ti362 | 2.089 | . | S |
| O154  | Ti169 | 1.964 | . | S |
| O155  | Ti159 | 1.962 | . | S |
| O156  | Ti160 | 1.904 | . | S |
| Ti157 | O161  | 2.119 | . | S |
| Ti157 | O166  | 2.058 | . | S |
| Ti157 | O382  | 2.031 | . | S |
| Ti158 | O162  | 2.089 | . | S |
| Ti158 | O167  | 2.056 | . | S |
| Ti158 | O165  | 1.890 | . | S |
| Ti158 | O163  | 1.801 | . | S |
| Ti158 | O189  | 1.978 | . | S |
| Ti159 | O163  | 1.911 | . | S |
| Ti159 | O166  | 1.954 | . | S |
| Ti159 | O161  | 2.012 | . | S |
| Ti159 | O185  | 1.952 | . | S |
| Ti159 | O167  | 1.901 | . | S |
| Ti160 | O164  | 2.090 | . | S |
| Ti160 | O165  | 2.006 | . | S |
| Ti160 | O162  | 1.973 | . | S |
| Ti160 | O378  | 1.968 | . | S |
| Ti160 | O168  | 1.933 | . | S |
| O161  | Ti375 | 2.024 | . | S |
| O162  | Ti184 | 1.951 | . | S |
| O165  | Ti374 | 1.895 | . | S |
| O166  | Ti181 | 2.071 | . | S |
| Ti169 | O173  | 1.946 | . | S |
| Ti169 | O178  | 2.047 | . | S |
| Ti170 | O174  | 2.001 | . | S |
| Ti170 | O179  | 1.997 | . | S |

|       |       |       |       |   |
|-------|-------|-------|-------|---|
| Ti170 | O177  | 2.083 | .     | S |
| Ti170 | O187  | 1.836 | .     | S |
| Ti170 | O345  | 2.090 | 1_565 | S |
| Ti171 | O175  | 2.034 | .     | S |
| Ti171 | O178  | 2.082 | .     | S |
| Ti171 | O191  | 1.855 | .     | S |
| Ti171 | O173  | 2.009 | .     | S |
| Ti171 | O341  | 1.996 | 1_565 | S |
| Ti172 | O176  | 1.998 | .     | S |
| Ti172 | O177  | 1.886 | .     | S |
| Ti172 | O192  | 1.921 | .     | S |
| Ti172 | O174  | 2.110 | .     | S |
| O174  | Ti340 | 2.121 | 1_565 | S |
| O175  | Ti182 | 1.952 | .     | S |
| O178  | Ti337 | 2.033 | 1_565 | S |
| O179  | Ti183 | 1.956 | .     | S |
| O180  | Ti184 | 1.913 | .     | S |
| Ti181 | O185  | 2.029 | .     | S |
| Ti181 | O190  | 2.047 | .     | S |
| Ti182 | O186  | 2.032 | .     | S |
| Ti182 | O191  | 1.996 | .     | S |
| Ti182 | O189  | 1.988 | .     | S |
| Ti182 | O187  | 1.850 | .     | S |
| Ti182 | O357  | 1.895 | 1_565 | S |
| Ti183 | O187  | 1.982 | .     | S |
| Ti183 | O190  | 1.929 | .     | S |
| Ti183 | O185  | 1.952 | .     | S |
| Ti183 | O353  | 2.024 | 1_565 | S |
| Ti183 | O191  | 1.816 | .     | S |
| Ti184 | O188  | 2.082 | .     | S |
| Ti184 | O189  | 2.099 | .     | S |
| Ti184 | O186  | 1.930 | .     | S |
| Ti184 | O192  | 1.998 | .     | S |
| O186  | Ti352 | 1.968 | 1_565 | S |
| O190  | Ti349 | 2.030 | 1_565 | S |
| Ti193 | O197  | 1.900 | 1_455 | S |
| Ti193 | O202  | 2.103 | 1_455 | S |
| Ti193 | O344  | 1.919 | .     | S |
| Ti193 | O34   | 2.093 | 1_445 | S |
| Ti194 | O198  | 2.007 | .     | S |
| Ti194 | O203  | 2.019 | .     | S |
| Ti194 | O201  | 2.010 | .     | S |
| Ti194 | O211  | 1.924 | .     | S |
| Ti194 | O199  | 1.941 | .     | S |
| Ti194 | O225  | 1.926 | .     | S |
| Ti195 | O199  | 1.946 | .     | S |
| Ti195 | O202  | 1.938 | .     | S |
| Ti195 | O197  | 2.030 | .     | S |
| Ti195 | O221  | 2.085 | .     | S |
| Ti195 | O203  | 1.828 | .     | S |
| Ti196 | O200  | 2.028 | .     | S |

|       |       |       |       |   |
|-------|-------|-------|-------|---|
| Ti196 | O201  | 2.109 | .     | S |
| Ti196 | O216  | 1.874 | .     | S |
| Ti196 | O198  | 1.877 | .     | S |
| Ti196 | O30   | 1.987 | 1_545 | S |
| Ti196 | O204  | 1.973 | .     | S |
| O197  | Ti193 | 1.900 | 1_655 | S |
| O197  | Ti27  | 2.046 | 1_545 | S |
| O198  | Ti220 | 1.918 | .     | S |
| O200  | Ti253 | 1.826 | .     | S |
| O200  | Ti241 | 1.872 | .     | S |
| O201  | Ti26  | 1.966 | 1_545 | S |
| O202  | Ti193 | 2.103 | 1_655 | S |
| O202  | Ti217 | 2.117 | 1_655 | S |
| O203  | Ti207 | 1.942 | .     | S |
| O204  | Ti241 | 2.076 | .     | S |
| Ti205 | O209  | 2.121 | 1_455 | S |
| Ti205 | O360  | 2.007 | .     | S |
| Ti205 | O214  | 1.958 | .     | S |
| Ti205 | O344  | 1.946 | .     | S |
| Ti205 | O356  | 2.028 | .     | S |
| Ti205 | O46   | 1.903 | 1_545 | S |
| Ti206 | O210  | 1.988 | .     | S |
| Ti206 | O215  | 1.998 | .     | S |
| Ti206 | O213  | 2.057 | .     | S |
| Ti206 | O211  | 1.834 | .     | S |
| Ti206 | O237  | 2.107 | .     | S |
| Ti207 | O211  | 2.035 | .     | S |
| Ti207 | O214  | 2.108 | 1_655 | S |
| Ti207 | O209  | 1.971 | .     | S |
| Ti207 | O233  | 1.895 | .     | S |
| Ti207 | O215  | 1.970 | .     | S |
| Ti208 | O212  | 2.021 | .     | S |
| Ti208 | O213  | 1.928 | .     | S |
| Ti208 | O210  | 2.123 | .     | S |
| Ti208 | O42   | 2.097 | 1_545 | S |
| Ti208 | O216  | 1.893 | .     | S |
| O209  | Ti205 | 2.121 | 1_655 | S |
| O209  | Ti39  | 2.008 | 1_545 | S |
| O210  | Ti232 | 2.138 | .     | S |
| O212  | Ti253 | 1.909 | .     | S |
| O213  | Ti38  | 2.037 | 1_545 | S |
| O214  | Ti207 | 2.108 | 1_455 | S |
| O214  | Ti229 | 1.996 | .     | S |
| O216  | Ti253 | 1.934 | .     | S |
| Ti217 | O221  | 1.895 | 1_455 | S |
| Ti217 | O226  | 2.111 | 1_455 | S |
| Ti217 | O368  | 1.950 | .     | S |
| Ti217 | O202  | 2.117 | 1_455 | S |
| Ti218 | O222  | 2.097 | .     | S |
| Ti218 | O227  | 1.994 | .     | S |
| Ti218 | O225  | 1.884 | .     | S |

|       |       |       |       |   |
|-------|-------|-------|-------|---|
| Ti218 | O235  | 1.898 | .     | S |
| Ti218 | O223  | 1.956 | .     | S |
| Ti219 | O223  | 2.020 | .     | S |
| Ti219 | O226  | 1.978 | .     | S |
| Ti219 | O221  | 2.103 | .     | S |
| Ti219 | O227  | 1.804 | .     | S |
| Ti220 | O224  | 2.046 | .     | S |
| Ti220 | O225  | 2.002 | .     | S |
| Ti220 | O240  | 1.905 | .     | S |
| Ti220 | O222  | 2.033 | .     | S |
| Ti220 | O228  | 1.973 | .     | S |
| O221  | Ti217 | 1.895 | 1_655 | S |
| O224  | Ti277 | 1.883 | .     | S |
| O224  | Ti265 | 1.935 | .     | S |
| O226  | Ti217 | 2.111 | 1_655 | S |
| O226  | Ti1   | 2.093 | 1_655 | S |
| O227  | Ti231 | 1.901 | .     | S |
| O228  | Ti265 | 2.012 | .     | S |
| Ti229 | O233  | 2.033 | 1_455 | S |
| Ti229 | O384  | 2.003 | .     | S |
| Ti229 | O238  | 1.950 | .     | S |
| Ti229 | O368  | 1.952 | .     | S |
| Ti229 | O380  | 1.967 | .     | S |
| Ti230 | O234  | 1.939 | .     | S |
| Ti230 | O239  | 2.026 | .     | S |
| Ti230 | O237  | 2.097 | .     | S |
| Ti230 | O235  | 1.795 | .     | S |
| Ti231 | O235  | 1.996 | .     | S |
| Ti231 | O238  | 2.041 | 1_655 | S |
| Ti231 | O233  | 1.930 | .     | S |
| Ti231 | O239  | 1.957 | .     | S |
| Ti232 | O236  | 2.004 | .     | S |
| Ti232 | O237  | 1.908 | .     | S |
| Ti232 | O234  | 2.114 | .     | S |
| Ti232 | O240  | 1.941 | .     | S |
| O233  | Ti229 | 2.033 | 1_655 | S |
| O236  | Ti277 | 1.918 | .     | S |
| O238  | Ti231 | 2.041 | 1_455 | S |
| O240  | Ti277 | 1.972 | .     | S |
| Ti241 | O245  | 2.097 | .     | S |
| Ti241 | O250  | 2.034 | .     | S |
| Ti241 | O82   | 2.012 | 1_545 | S |
| Ti242 | O246  | 2.037 | .     | S |
| Ti242 | O251  | 2.062 | .     | S |
| Ti242 | O249  | 2.036 | .     | S |
| Ti242 | O259  | 1.978 | .     | S |
| Ti242 | O247  | 1.856 | .     | S |
| Ti242 | O273  | 1.913 | .     | S |
| Ti243 | O247  | 1.997 | .     | S |
| Ti243 | O250  | 1.964 | .     | S |
| Ti243 | O263  | 1.960 | .     | S |

|       |       |       |       |   |
|-------|-------|-------|-------|---|
| Ti243 | O245  | 2.064 | .     | S |
| Ti243 | O269  | 1.970 | .     | S |
| Ti243 | O251  | 1.885 | .     | S |
| Ti244 | O248  | 2.078 | .     | S |
| Ti244 | O249  | 2.099 | .     | S |
| Ti244 | O264  | 1.904 | .     | S |
| Ti244 | O246  | 1.930 | .     | S |
| Ti244 | O78   | 1.940 | 1_545 | S |
| Ti244 | O252  | 1.963 | .     | S |
| O245  | Ti75  | 2.060 | 1_545 | S |
| O246  | Ti268 | 1.984 | .     | S |
| O247  | Ti254 | 1.855 | .     | S |
| O248  | Ti289 | 1.991 | .     | S |
| O249  | Ti74  | 2.015 | 1_545 | S |
| O250  | Ti265 | 2.103 | .     | S |
| O251  | Ti255 | 1.927 | .     | S |
| O252  | Ti289 | 1.965 | .     | S |
| O252  | Ti256 | 1.890 | .     | S |
| Ti253 | O257  | 1.903 | .     | S |
| Ti253 | O262  | 1.966 | .     | S |
| Ti253 | O94   | 2.048 | 1_545 | S |
| Ti254 | O258  | 2.001 | .     | S |
| Ti254 | O263  | 1.985 | .     | S |
| Ti254 | O261  | 2.056 | .     | S |
| Ti254 | O285  | 2.125 | .     | S |
| Ti255 | O259  | 2.011 | .     | S |
| Ti255 | O262  | 2.065 | .     | S |
| Ti255 | O257  | 2.054 | .     | S |
| Ti255 | O281  | 2.099 | .     | S |
| Ti256 | O260  | 2.028 | .     | S |
| Ti256 | O261  | 1.920 | .     | S |
| Ti256 | O258  | 2.112 | .     | S |
| Ti256 | O90   | 2.104 | 1_545 | S |
| O257  | Ti87  | 2.003 | 1_545 | S |
| O258  | Ti280 | 2.118 | .     | S |
| O260  | Ti289 | 1.933 | .     | S |
| O260  | Ti301 | 1.971 | .     | S |
| O261  | Ti86  | 2.034 | 1_545 | S |
| O262  | Ti277 | 1.971 | .     | S |
| Ti265 | O269  | 2.058 | .     | S |
| Ti265 | O274  | 2.063 | .     | S |
| Ti266 | O270  | 2.087 | .     | S |
| Ti266 | O275  | 2.040 | .     | S |
| Ti266 | O273  | 1.890 | .     | S |
| Ti266 | O283  | 1.979 | .     | S |
| Ti266 | O271  | 1.818 | .     | S |
| Ti267 | O271  | 1.940 | .     | S |
| Ti267 | O274  | 1.914 | .     | S |
| Ti267 | O287  | 1.953 | .     | S |
| Ti267 | O269  | 1.958 | .     | S |
| Ti267 | O275  | 1.828 | .     | S |

|       |       |       |       |   |
|-------|-------|-------|-------|---|
| Ti268 | O272  | 2.106 | .     | S |
| Ti268 | O273  | 2.028 | .     | S |
| Ti268 | O288  | 1.917 | .     | S |
| Ti268 | O270  | 2.002 | .     | S |
| Ti268 | O276  | 1.980 | .     | S |
| O271  | Ti278 | 1.808 | .     | S |
| O272  | Ti313 | 1.977 | .     | S |
| O275  | Ti279 | 1.858 | .     | S |
| O276  | Ti313 | 2.019 | .     | S |
| O276  | Ti280 | 1.933 | .     | S |
| Ti277 | O281  | 1.951 | .     | S |
| Ti277 | O286  | 2.049 | .     | S |
| Ti278 | O282  | 1.941 | .     | S |
| Ti278 | O287  | 1.997 | .     | S |
| Ti278 | O285  | 2.111 | .     | S |
| Ti279 | O283  | 2.047 | .     | S |
| Ti279 | O286  | 2.088 | .     | S |
| Ti279 | O281  | 2.028 | .     | S |
| Ti280 | O284  | 1.966 | .     | S |
| Ti280 | O285  | 1.890 | .     | S |
| Ti280 | O282  | 2.107 | .     | S |
| O284  | Ti313 | 1.911 | .     | S |
| O284  | Ti325 | 1.890 | .     | S |
| Ti289 | O293  | 2.012 | .     | S |
| Ti289 | O298  | 1.936 | .     | S |
| Ti289 | O130  | 1.990 | 1_545 | S |
| Ti290 | O294  | 1.992 | .     | S |
| Ti290 | O299  | 2.017 | .     | S |
| Ti290 | O297  | 2.114 | .     | S |
| Ti290 | O295  | 1.836 | .     | S |
| Ti290 | O321  | 2.058 | .     | S |
| Ti291 | O295  | 2.022 | .     | S |
| Ti291 | O298  | 2.033 | .     | S |
| Ti291 | O311  | 1.908 | .     | S |
| Ti291 | O293  | 1.947 | .     | S |
| Ti291 | O317  | 2.023 | .     | S |
| Ti291 | O299  | 1.956 | .     | S |
| Ti292 | O296  | 1.997 | .     | S |
| Ti292 | O297  | 1.905 | .     | S |
| Ti292 | O294  | 2.137 | .     | S |
| Ti292 | O126  | 2.111 | 1_545 | S |
| Ti292 | O300  | 1.939 | .     | S |
| O293  | Ti123 | 1.890 | 1_545 | S |
| O294  | Ti316 | 2.120 | .     | S |
| O295  | Ti302 | 1.918 | .     | S |
| O296  | Ti337 | 1.913 | .     | S |
| O297  | Ti122 | 2.091 | 1_545 | S |
| O298  | Ti313 | 1.901 | .     | S |
| O300  | Ti337 | 1.970 | .     | S |
| O300  | Ti304 | 1.907 | .     | S |
| Ti301 | O305  | 1.993 | .     | S |

|       |       |       |       |   |
|-------|-------|-------|-------|---|
| Ti301 | O310  | 2.077 | .     | S |
| Ti301 | O142  | 2.050 | 1_545 | S |
| Ti302 | O306  | 1.996 | .     | S |
| Ti302 | O311  | 2.008 | .     | S |
| Ti302 | O309  | 1.908 | .     | S |
| Ti302 | O307  | 1.929 | .     | S |
| Ti302 | O333  | 2.011 | .     | S |
| Ti303 | O307  | 1.940 | .     | S |
| Ti303 | O310  | 1.964 | .     | S |
| Ti303 | O305  | 2.066 | .     | S |
| Ti303 | O329  | 2.014 | .     | S |
| Ti303 | O311  | 1.837 | .     | S |
| Ti304 | O308  | 2.042 | .     | S |
| Ti304 | O309  | 2.011 | .     | S |
| Ti304 | O306  | 1.925 | .     | S |
| Ti304 | O138  | 2.040 | 1_545 | S |
| Ti304 | O312  | 1.973 | .     | S |
| O305  | Ti135 | 2.061 | 1_545 | S |
| O306  | Ti328 | 1.880 | .     | S |
| O308  | Ti337 | 1.869 | .     | S |
| O308  | Ti349 | 1.943 | .     | S |
| O309  | Ti134 | 1.905 | 1_545 | S |
| O310  | Ti325 | 2.043 | .     | S |
| O312  | Ti349 | 2.026 | .     | S |
| Ti313 | O317  | 2.120 | .     | S |
| Ti313 | O322  | 1.956 | .     | S |
| Ti314 | O318  | 1.926 | .     | S |
| Ti314 | O323  | 1.988 | .     | S |
| Ti314 | O321  | 2.029 | .     | S |
| Ti314 | O319  | 1.799 | .     | S |
| Ti315 | O319  | 1.997 | .     | S |
| Ti315 | O322  | 2.095 | .     | S |
| Ti315 | O335  | 1.992 | .     | S |
| Ti315 | O317  | 1.977 | .     | S |
| Ti315 | O323  | 1.961 | .     | S |
| Ti316 | O320  | 2.023 | .     | S |
| Ti316 | O321  | 1.925 | .     | S |
| Ti316 | O318  | 2.102 | .     | S |
| Ti316 | O324  | 1.893 | .     | S |
| O319  | Ti326 | 1.872 | .     | S |
| O320  | Ti361 | 1.912 | .     | S |
| O324  | Ti361 | 1.941 | .     | S |
| O324  | Ti328 | 1.878 | .     | S |
| Ti325 | O329  | 1.886 | .     | S |
| Ti325 | O334  | 2.037 | .     | S |
| Ti326 | O330  | 2.096 | .     | S |
| Ti326 | O335  | 2.046 | .     | S |
| Ti326 | O333  | 1.977 | .     | S |
| Ti326 | O331  | 1.929 | .     | S |
| Ti327 | O331  | 1.991 | .     | S |
| Ti327 | O334  | 1.969 | .     | S |

|       |       |       |       |   |
|-------|-------|-------|-------|---|
| Ti327 | O329  | 2.030 | .     | S |
| Ti327 | O335  | 1.852 | .     | S |
| Ti328 | O332  | 2.018 | .     | S |
| Ti328 | O333  | 2.111 | .     | S |
| Ti328 | O330  | 1.983 | .     | S |
| Ti328 | O336  | 1.955 | .     | S |
| O332  | Ti361 | 1.849 | .     | S |
| O332  | Ti373 | 1.876 | .     | S |
| O336  | Ti373 | 2.062 | .     | S |
| Ti337 | O341  | 1.914 | .     | S |
| Ti337 | O346  | 1.957 | .     | S |
| Ti337 | O178  | 2.033 | 1_545 | S |
| Ti338 | O342  | 1.946 | .     | S |
| Ti338 | O347  | 1.997 | .     | S |
| Ti338 | O345  | 2.072 | .     | S |
| Ti338 | O355  | 1.808 | .     | S |
| Ti338 | O369  | 2.067 | .     | S |
| Ti339 | O343  | 2.044 | .     | S |
| Ti339 | O346  | 2.072 | .     | S |
| Ti339 | O359  | 1.916 | .     | S |
| Ti339 | O341  | 2.085 | .     | S |
| Ti339 | O365  | 2.085 | .     | S |
| Ti340 | O344  | 1.984 | .     | S |
| Ti340 | O345  | 1.936 | .     | S |
| Ti340 | O360  | 1.910 | .     | S |
| Ti340 | O342  | 2.111 | .     | S |
| Ti340 | O174  | 2.121 | 1_545 | S |
| O341  | Ti171 | 1.996 | 1_545 | S |
| O342  | Ti364 | 2.102 | .     | S |
| O343  | Ti350 | 1.998 | .     | S |
| O345  | Ti170 | 2.090 | 1_545 | S |
| O346  | Ti361 | 1.962 | .     | S |
| O347  | Ti351 | 1.962 | .     | S |
| O348  | Ti352 | 1.904 | .     | S |
| Ti349 | O353  | 2.119 | .     | S |
| Ti349 | O358  | 2.060 | .     | S |
| Ti349 | O190  | 2.030 | 1_545 | S |
| Ti350 | O354  | 2.088 | .     | S |
| Ti350 | O359  | 2.056 | .     | S |
| Ti350 | O357  | 1.889 | .     | S |
| Ti350 | O355  | 1.801 | .     | S |
| Ti350 | O381  | 1.979 | .     | S |
| Ti351 | O355  | 1.911 | .     | S |
| Ti351 | O358  | 1.954 | .     | S |
| Ti351 | O353  | 2.013 | .     | S |
| Ti351 | O377  | 1.952 | .     | S |
| Ti351 | O359  | 1.901 | .     | S |
| Ti352 | O356  | 2.090 | .     | S |
| Ti352 | O357  | 2.007 | .     | S |
| Ti352 | O354  | 1.972 | .     | S |
| Ti352 | O186  | 1.968 | 1_545 | S |



|       |       |       |       |   |
|-------|-------|-------|-------|---|
| Ti352 | O360  | 1.933 | .     | S |
| O353  | Ti183 | 2.024 | 1_545 | S |
| O354  | Ti376 | 1.951 | .     | S |
| O357  | Ti182 | 1.895 | 1_545 | S |
| O358  | Ti373 | 2.070 | .     | S |
| Ti361 | O365  | 1.944 | .     | S |
| Ti361 | O370  | 2.047 | .     | S |
| Ti362 | O366  | 2.000 | .     | S |
| Ti362 | O371  | 1.996 | .     | S |
| Ti362 | O369  | 2.083 | .     | S |
| Ti362 | O379  | 1.835 | .     | S |
| Ti363 | O367  | 2.033 | .     | S |
| Ti363 | O370  | 2.079 | .     | S |
| Ti363 | O383  | 1.855 | .     | S |
| Ti363 | O365  | 2.012 | .     | S |
| Ti364 | O368  | 1.998 | .     | S |
| Ti364 | O369  | 1.886 | .     | S |
| Ti364 | O384  | 1.921 | .     | S |
| Ti364 | O366  | 2.111 | .     | S |
| O367  | Ti374 | 1.951 | .     | S |
| O371  | Ti375 | 1.956 | .     | S |
| O372  | Ti376 | 1.913 | .     | S |
| Ti373 | O377  | 2.025 | .     | S |
| Ti373 | O382  | 2.045 | .     | S |
| Ti374 | O378  | 2.031 | .     | S |
| Ti374 | O383  | 1.995 | .     | S |
| Ti374 | O381  | 1.988 | .     | S |
| Ti374 | O379  | 1.850 | .     | S |
| Ti375 | O379  | 1.982 | .     | S |
| Ti375 | O382  | 1.929 | .     | S |
| Ti375 | O377  | 1.952 | .     | S |
| Ti375 | O383  | 1.817 | .     | S |
| Ti376 | O380  | 2.082 | .     | S |
| Ti376 | O381  | 2.098 | .     | S |
| Ti376 | O378  | 1.931 | .     | S |
| Ti376 | O384  | 1.998 | .     | S |
| C385  | C386  | 1.210 | .     | T |
| C385  | C408  | 1.353 | .     | A |
| C386  | C387  | 1.333 | .     | D |
| C387  | C388  | 1.216 | .     | T |
| C388  | C389  | 1.324 | .     | D |
| C389  | C390  | 1.215 | .     | T |
| C390  | C391  | 1.326 | .     | D |
| C391  | C392  | 1.214 | .     | T |
| C392  | C393  | 1.357 | .     | A |
| C393  | C394  | 1.322 | .     | D |
| C393  | S395  | 1.794 | .     | S |
| C394  | C396  | 1.379 | .     | A |
| C394  | H397  | 1.083 | .     | S |
| S395  | C398  | 1.812 | .     | S |
| C396  | C398  | 1.333 | .     | D |

|      |       |       |       |   |
|------|-------|-------|-------|---|
| C396 | H399  | 1.083 | .     | S |
| C398 | C400  | 1.410 | .     | A |
| C400 | H401  | 1.084 | .     | S |
| C400 | C402  | 1.361 | .     | D |
| C402 | C403  | 1.370 | .     | A |
| C402 | C404  | 1.489 | .     | S |
| C403 | N407  | 1.163 | .     | T |
| C404 | O405  | 1.285 | .     | A |
| C404 | O406  | 1.230 | .     | D |
| O405 | Ti111 | 1.893 | 1_445 | S |
| O406 | Ti135 | 1.892 | 1_445 | S |
| C408 | C409  | 1.324 | .     | D |
| C408 | S410  | 1.799 | .     | S |
| C409 | C411  | 1.379 | .     | A |
| C409 | H412  | 1.083 | .     | S |
| S410 | C413  | 1.806 | .     | S |
| C411 | C413  | 1.328 | .     | D |
| C411 | H414  | 1.082 | .     | S |
| C413 | N423  | 1.356 | .     | A |
| H415 | N423  | 1.043 | .     | S |
| C416 | C417  | 1.321 | .     | D |
| C416 | N423  | 1.428 | .     | S |
| C416 | N424  | 1.413 | .     | S |
| C417 | C418  | 1.385 | .     | A |
| C417 | H419  | 1.080 | .     | S |
| C418 | C420  | 1.329 | .     | D |
| C418 | H421  | 1.081 | .     | S |
| C420 | H422  | 1.084 | .     | S |
| C420 | N424  | 1.345 | .     | A |
| N424 | H425  | 1.042 | .     | S |

data\_TiO2@PY3COO

\_audit\_creation\_method 'Materials Studio'

\_symmetry\_space\_group\_name\_H-M 'P1'

\_symmetry\_Int\_Tables\_number 1

\_symmetry\_cell\_setting triclinic

loop\_

\_symmetry\_equiv\_pos\_as\_xyz

x,y,z

\_cell\_length\_a 38.6882

\_cell\_length\_b 15.1040

\_cell\_length\_c 47.5200

\_cell\_angle\_alpha 90.0000

\_cell\_angle\_beta 90.0000

\_cell\_angle\_gamma 90.0000

loop\_

\_atom\_site\_label

\_atom\_site\_type\_symbol

\_atom\_site\_fract\_x

\_atom\_site\_fract\_y

| <u>_atom_site_fract_z</u>        |    |          |         |         |         |      |      |
|----------------------------------|----|----------|---------|---------|---------|------|------|
| <u>_atom_site_U_iso_or_equiv</u> |    |          |         |         |         |      |      |
| <u>_atom_site_adp_type</u>       |    |          |         |         |         |      |      |
| <u>_atom_site_occupancy</u>      |    |          |         |         |         |      |      |
| Ti1                              | Ti | -0.00744 | 0.50326 | 0.83905 | 0.00000 | Uiso | 1.00 |
| Ti2                              | Ti | 0.89033  | 0.62884 | 0.88949 | 0.00000 | Uiso | 1.00 |
| Ti3                              | Ti | 0.93610  | 0.62235 | 0.84667 | 0.00000 | Uiso | 1.00 |
| Ti4                              | Ti | 0.83305  | 0.50423 | 0.90251 | 0.00000 | Uiso | 1.00 |
| O5                               | O  | 0.95145  | 0.50189 | 0.86092 | 0.00000 | Uiso | 1.00 |
| O6                               | O  | 0.83860  | 0.62294 | 0.89178 | 0.00000 | Uiso | 1.00 |
| O7                               | O  | 0.88617  | 0.60908 | 0.84927 | 0.00000 | Uiso | 1.00 |
| O8                               | O  | 0.78356  | 0.53601 | 0.91224 | 0.00000 | Uiso | 1.00 |
| O9                               | O  | 0.88729  | 0.49898 | 0.89842 | 0.00000 | Uiso | 1.00 |
| O10                              | O  | 0.97670  | 0.62623 | 0.82283 | 0.00000 | Uiso | 1.00 |
| O11                              | O  | 0.94111  | 0.65360 | 0.88361 | 0.00000 | Uiso | 1.00 |
| O12                              | O  | 0.80823  | 0.47958 | 0.86710 | 0.00000 | Uiso | 1.00 |
| Ti13                             | Ti | 0.02034  | 0.49672 | 0.90717 | 0.00000 | Uiso | 1.00 |
| Ti14                             | Ti | 0.91246  | 0.62069 | 0.96215 | 0.00000 | Uiso | 1.00 |
| Ti15                             | Ti | 0.96388  | 0.62871 | 0.91917 | 0.00000 | Uiso | 1.00 |
| Ti16                             | Ti | 0.85550  | 0.49898 | 0.97590 | 0.00000 | Uiso | 1.00 |
| O17                              | O  | 0.96571  | 0.50118 | 0.91056 | 0.00000 | Uiso | 1.00 |
| O18                              | O  | 0.87353  | 0.62474 | 0.98943 | 0.00000 | Uiso | 1.00 |
| O19                              | O  | 0.91259  | 0.65252 | 0.92491 | 0.00000 | Uiso | 1.00 |
| O20                              | O  | 0.80559  | 0.47309 | 0.98533 | 0.00000 | Uiso | 1.00 |
| O21                              | O  | 0.89392  | 0.49881 | 0.95007 | 0.00000 | Uiso | 1.00 |
| O22                              | O  | 0.01816  | 0.62334 | 0.91575 | 0.00000 | Uiso | 1.00 |
| O23                              | O  | 0.96378  | 0.60783 | 0.96008 | 0.00000 | Uiso | 1.00 |
| O24                              | O  | 0.83565  | 0.53112 | 0.94095 | 0.00000 | Uiso | 1.00 |
| Ti25                             | Ti | -0.00902 | 0.75062 | 0.83973 | 0.00000 | Uiso | 1.00 |
| Ti26                             | Ti | 0.88826  | 0.86999 | 0.89295 | 0.00000 | Uiso | 1.00 |
| Ti27                             | Ti | 0.93399  | 0.88216 | 0.84666 | 0.00000 | Uiso | 1.00 |
| Ti28                             | Ti | 0.82885  | 0.74509 | 0.89939 | 0.00000 | Uiso | 1.00 |
| O29                              | O  | 0.94755  | 0.75229 | 0.85816 | 0.00000 | Uiso | 1.00 |
| O30                              | O  | 0.83761  | 0.87460 | 0.90862 | 0.00000 | Uiso | 1.00 |
| O31                              | O  | 0.88253  | 0.89387 | 0.85277 | 0.00000 | Uiso | 1.00 |
| O32                              | O  | 0.77911  | 0.71883 | 0.91135 | 0.00000 | Uiso | 1.00 |
| O33                              | O  | 0.87738  | 0.75108 | 0.88489 | 0.00000 | Uiso | 1.00 |
| O34                              | O  | 0.97754  | 0.87776 | 0.82489 | 0.00000 | Uiso | 1.00 |
| O35                              | O  | 0.93725  | 0.84486 | 0.88263 | 0.00000 | Uiso | 1.00 |
| O36                              | O  | 0.80776  | 0.76244 | 0.86197 | 0.00000 | Uiso | 1.00 |
| Ti37                             | Ti | 0.02465  | 0.75301 | 0.90960 | 0.00000 | Uiso | 1.00 |
| Ti38                             | Ti | 0.91501  | 0.88131 | 0.96223 | 0.00000 | Uiso | 1.00 |
| Ti39                             | Ti | 0.96172  | 0.86988 | 0.91638 | 0.00000 | Uiso | 1.00 |
| Ti40                             | Ti | 0.85658  | 0.75123 | 0.97471 | 0.00000 | Uiso | 1.00 |
| O41                              | O  | 0.97534  | 0.74958 | 0.92435 | 0.00000 | Uiso | 1.00 |
| O42                              | O  | 0.87586  | 0.87575 | 0.98764 | 0.00000 | Uiso | 1.00 |
| O43                              | O  | 0.91273  | 0.84326 | 0.92650 | 0.00000 | Uiso | 1.00 |
| O44                              | O  | 0.80748  | 0.77843 | 0.98500 | 0.00000 | Uiso | 1.00 |
| O45                              | O  | 0.89825  | 0.75237 | 0.95324 | 0.00000 | Uiso | 1.00 |
| O46                              | O  | 0.01102  | 0.87443 | 0.90119 | 0.00000 | Uiso | 1.00 |
| O47                              | O  | 0.96671  | 0.89331 | 0.95668 | 0.00000 | Uiso | 1.00 |

|      |    |         |         |         |         |      |      |
|------|----|---------|---------|---------|---------|------|------|
| O48  | O  | 0.83603 | 0.72396 | 0.93847 | 0.00000 | Uiso | 1.00 |
| Ti49 | Ti | 0.75789 | 0.49767 | 0.88113 | 0.00000 | Uiso | 1.00 |
| Ti50 | Ti | 0.65669 | 0.62775 | 0.92728 | 0.00000 | Uiso | 1.00 |
| Ti51 | Ti | 0.69754 | 0.62387 | 0.87701 | 0.00000 | Uiso | 1.00 |
| Ti52 | Ti | 0.59852 | 0.49924 | 0.93187 | 0.00000 | Uiso | 1.00 |
| O53  | O  | 0.70500 | 0.49557 | 0.89074 | 0.00000 | Uiso | 1.00 |
| O54  | O  | 0.60724 | 0.62128 | 0.94176 | 0.00000 | Uiso | 1.00 |
| O55  | O  | 0.64971 | 0.65404 | 0.88957 | 0.00000 | Uiso | 1.00 |
| O56  | O  | 0.54829 | 0.50812 | 0.94689 | 0.00000 | Uiso | 1.00 |
| O57  | O  | 0.64905 | 0.49933 | 0.91584 | 0.00000 | Uiso | 1.00 |
| O58  | O  | 0.74537 | 0.61588 | 0.86329 | 0.00000 | Uiso | 1.00 |
| O59  | O  | 0.70664 | 0.65432 | 0.91476 | 0.00000 | Uiso | 1.00 |
| O60  | O  | 0.57021 | 0.52665 | 0.89867 | 0.00000 | Uiso | 1.00 |
| Ti61 | Ti | 0.78785 | 0.50392 | 0.94914 | 0.00000 | Uiso | 1.00 |
| Ti62 | Ti | 0.62877 | 0.61488 | 0.85669 | 0.00000 | Uiso | 1.00 |
| Ti63 | Ti | 0.72720 | 0.62684 | 0.95065 | 0.00000 | Uiso | 1.00 |
| Ti64 | Ti | 0.56881 | 0.49415 | 0.86039 | 0.00000 | Uiso | 1.00 |
| O65  | O  | 0.73995 | 0.49686 | 0.95795 | 0.00000 | Uiso | 1.00 |
| O66  | O  | 0.57974 | 0.62007 | 0.84299 | 0.00000 | Uiso | 1.00 |
| O67  | O  | 0.67858 | 0.60840 | 0.96437 | 0.00000 | Uiso | 1.00 |
| O68  | O  | 0.51908 | 0.46727 | 0.87118 | 0.00000 | Uiso | 1.00 |
| O69  | O  | 0.61565 | 0.49407 | 0.87371 | 0.00000 | Uiso | 1.00 |
| O70  | O  | 0.77901 | 0.62650 | 0.96105 | 0.00000 | Uiso | 1.00 |
| O71  | O  | 0.67569 | 0.59471 | 0.84092 | 0.00000 | Uiso | 1.00 |
| O72  | O  | 0.61902 | 0.47073 | 0.96713 | 0.00000 | Uiso | 1.00 |
| Ti73 | Ti | 0.75874 | 0.74565 | 0.87511 | 0.00000 | Uiso | 1.00 |
| Ti74 | Ti | 0.65365 | 0.86865 | 0.92345 | 0.00000 | Uiso | 1.00 |
| Ti75 | Ti | 0.69812 | 0.86794 | 0.87663 | 0.00000 | Uiso | 1.00 |
| Ti76 | Ti | 0.59468 | 0.74760 | 0.93685 | 0.00000 | Uiso | 1.00 |
| O77  | O  | 0.70708 | 0.74601 | 0.86471 | 0.00000 | Uiso | 1.00 |
| O78  | O  | 0.59975 | 0.87340 | 0.92421 | 0.00000 | Uiso | 1.00 |
| O79  | O  | 0.65120 | 0.83547 | 0.88673 | 0.00000 | Uiso | 1.00 |
| O80  | O  | 0.54177 | 0.73565 | 0.94598 | 0.00000 | Uiso | 1.00 |
| O81  | O  | 0.64696 | 0.74973 | 0.93466 | 0.00000 | Uiso | 1.00 |
| O82  | O  | 0.74608 | 0.87583 | 0.86690 | 0.00000 | Uiso | 1.00 |
| O83  | O  | 0.70325 | 0.83559 | 0.91347 | 0.00000 | Uiso | 1.00 |
| O84  | O  | 0.57035 | 0.72015 | 0.90137 | 0.00000 | Uiso | 1.00 |
| Ti85 | Ti | 0.78778 | 0.74943 | 0.94913 | 0.00000 | Uiso | 1.00 |
| Ti86 | Ti | 0.63050 | 0.87901 | 0.85551 | 0.00000 | Uiso | 1.00 |
| Ti87 | Ti | 0.72863 | 0.87498 | 0.94422 | 0.00000 | Uiso | 1.00 |
| Ti88 | Ti | 0.57209 | 0.74633 | 0.86165 | 0.00000 | Uiso | 1.00 |
| O89  | O  | 0.74009 | 0.75679 | 0.96224 | 0.00000 | Uiso | 1.00 |
| O90  | O  | 0.58247 | 0.87132 | 0.84372 | 0.00000 | Uiso | 1.00 |
| O91  | O  | 0.67930 | 0.89495 | 0.95847 | 0.00000 | Uiso | 1.00 |
| O92  | O  | 0.52481 | 0.78308 | 0.87155 | 0.00000 | Uiso | 1.00 |
| O93  | O  | 0.62011 | 0.74847 | 0.86902 | 0.00000 | Uiso | 1.00 |
| O94  | O  | 0.78143 | 0.87676 | 0.93521 | 0.00000 | Uiso | 1.00 |
| O95  | O  | 0.67800 | 0.89934 | 0.84027 | 0.00000 | Uiso | 1.00 |
| O96  | O  | 0.60770 | 0.77589 | 0.97472 | 0.00000 | Uiso | 1.00 |
| Ti97 | Ti | 0.52257 | 0.50186 | 0.91062 | 0.00000 | Uiso | 1.00 |
| Ti98 | Ti | 0.41295 | 0.63215 | 0.96154 | 0.00000 | Uiso | 1.00 |

|       |    |         |         |         |         |      |      |
|-------|----|---------|---------|---------|---------|------|------|
| Ti99  | Ti | 0.46034 | 0.61893 | 0.91591 | 0.00000 | Uiso | 1.00 |
| Ti100 | Ti | 0.35659 | 0.50118 | 0.97467 | 0.00000 | Uiso | 1.00 |
| O101  | O  | 0.47400 | 0.49891 | 0.92566 | 0.00000 | Uiso | 1.00 |
| O102  | O  | 0.37427 | 0.62718 | 0.98927 | 0.00000 | Uiso | 1.00 |
| O103  | O  | 0.41036 | 0.59436 | 0.92495 | 0.00000 | Uiso | 1.00 |
| O104  | O  | 0.30762 | 0.47473 | 0.98502 | 0.00000 | Uiso | 1.00 |
| O105  | O  | 0.39805 | 0.50015 | 0.95298 | 0.00000 | Uiso | 1.00 |
| O106  | O  | 0.50994 | 0.62347 | 0.90201 | 0.00000 | Uiso | 1.00 |
| O107  | O  | 0.46450 | 0.64570 | 0.95607 | 0.00000 | Uiso | 1.00 |
| O108  | O  | 0.33643 | 0.52705 | 0.93825 | 0.00000 | Uiso | 1.00 |
| Ti109 | Ti | 0.48804 | 0.49063 | 0.83909 | 0.00000 | Uiso | 1.00 |
| Ti110 | Ti | 0.39075 | 0.61722 | 0.88897 | 0.00000 | Uiso | 1.00 |
| Ti111 | Ti | 0.43584 | 0.62941 | 0.84353 | 0.00000 | Uiso | 1.00 |
| Ti112 | Ti | 0.32904 | 0.50252 | 0.89943 | 0.00000 | Uiso | 1.00 |
| O113  | O  | 0.43722 | 0.49617 | 0.83399 | 0.00000 | Uiso | 1.00 |
| O114  | O  | 0.33916 | 0.62516 | 0.89193 | 0.00000 | Uiso | 1.00 |
| O115  | O  | 0.38582 | 0.63655 | 0.85040 | 0.00000 | Uiso | 1.00 |
| O116  | O  | 0.27936 | 0.52871 | 0.91120 | 0.00000 | Uiso | 1.00 |
| O117  | O  | 0.37744 | 0.49607 | 0.88455 | 0.00000 | Uiso | 1.00 |
| O118  | O  | 0.48472 | 0.62446 | 0.83354 | 0.00000 | Uiso | 1.00 |
| O119  | O  | 0.44068 | 0.58792 | 0.88041 | 0.00000 | Uiso | 1.00 |
| O120  | O  | 0.30708 | 0.48227 | 0.86252 | 0.00000 | Uiso | 1.00 |
| Ti121 | Ti | 0.51997 | 0.74558 | 0.90858 | 0.00000 | Uiso | 1.00 |
| Ti122 | Ti | 0.41366 | 0.87041 | 0.96165 | 0.00000 | Uiso | 1.00 |
| Ti123 | Ti | 0.46396 | 0.87860 | 0.91844 | 0.00000 | Uiso | 1.00 |
| Ti124 | Ti | 0.35517 | 0.75168 | 0.97587 | 0.00000 | Uiso | 1.00 |
| O125  | O  | 0.46531 | 0.75074 | 0.90901 | 0.00000 | Uiso | 1.00 |
| O126  | O  | 0.37516 | 0.87575 | 0.98735 | 0.00000 | Uiso | 1.00 |
| O127  | O  | 0.41458 | 0.90683 | 0.92558 | 0.00000 | Uiso | 1.00 |
| O128  | O  | 0.30492 | 0.77437 | 0.98525 | 0.00000 | Uiso | 1.00 |
| O129  | O  | 0.39304 | 0.75285 | 0.94952 | 0.00000 | Uiso | 1.00 |
| O130  | O  | 0.51791 | 0.87275 | 0.91609 | 0.00000 | Uiso | 1.00 |
| O131  | O  | 0.46461 | 0.85460 | 0.95898 | 0.00000 | Uiso | 1.00 |
| O132  | O  | 0.33559 | 0.71747 | 0.94109 | 0.00000 | Uiso | 1.00 |
| Ti133 | Ti | 0.49004 | 0.74930 | 0.84723 | 0.00000 | Uiso | 1.00 |
| Ti134 | Ti | 0.39092 | 0.87914 | 0.89282 | 0.00000 | Uiso | 1.00 |
| Ti135 | Ti | 0.43271 | 0.86197 | 0.84407 | 0.00000 | Uiso | 1.00 |
| Ti136 | Ti | 0.33478 | 0.74473 | 0.90250 | 0.00000 | Uiso | 1.00 |
| O137  | O  | 0.44270 | 0.74598 | 0.85973 | 0.00000 | Uiso | 1.00 |
| O138  | O  | 0.34024 | 0.87400 | 0.90905 | 0.00000 | Uiso | 1.00 |
| O139  | O  | 0.38251 | 0.85558 | 0.85492 | 0.00000 | Uiso | 1.00 |
| O140  | O  | 0.28473 | 0.71674 | 0.91099 | 0.00000 | Uiso | 1.00 |
| O141  | O  | 0.38930 | 0.74817 | 0.89821 | 0.00000 | Uiso | 1.00 |
| O142  | O  | 0.47949 | 0.86645 | 0.82931 | 0.00000 | Uiso | 1.00 |
| O143  | O  | 0.44175 | 0.90354 | 0.88121 | 0.00000 | Uiso | 1.00 |
| O144  | O  | 0.31353 | 0.76948 | 0.86594 | 0.00000 | Uiso | 1.00 |
| Ti145 | Ti | 0.28832 | 0.50097 | 0.94888 | 0.00000 | Uiso | 1.00 |
| Ti146 | Ti | 0.13403 | 0.62434 | 0.85216 | 0.00000 | Uiso | 1.00 |
| Ti147 | Ti | 0.22582 | 0.62004 | 0.95021 | 0.00000 | Uiso | 1.00 |
| Ti148 | Ti | 0.07484 | 0.49807 | 0.85956 | 0.00000 | Uiso | 1.00 |
| O149  | O  | 0.24147 | 0.49294 | 0.96151 | 0.00000 | Uiso | 1.00 |

|       |    |          |         |         |         |      |      |
|-------|----|----------|---------|---------|---------|------|------|
| O150  | O  | 0.08523  | 0.62385 | 0.84215 | 0.00000 | Uiso | 1.00 |
| O151  | O  | 0.17502  | 0.60830 | 0.96145 | 0.00000 | Uiso | 1.00 |
| O152  | O  | 0.02600  | 0.52859 | 0.86776 | 0.00000 | Uiso | 1.00 |
| O153  | O  | 0.12389  | 0.49870 | 0.86763 | 0.00000 | Uiso | 1.00 |
| O154  | O  | 0.27802  | 0.62268 | 0.96007 | 0.00000 | Uiso | 1.00 |
| O155  | O  | 0.18147  | 0.64857 | 0.83749 | 0.00000 | Uiso | 1.00 |
| O156  | O  | 0.11569  | 0.52577 | 0.96813 | 0.00000 | Uiso | 1.00 |
| Ti157 | Ti | 0.25768  | 0.49995 | 0.87545 | 0.00000 | Uiso | 1.00 |
| Ti158 | Ti | 0.15538  | 0.62032 | 0.92275 | 0.00000 | Uiso | 1.00 |
| Ti159 | Ti | 0.20109  | 0.63091 | 0.87515 | 0.00000 | Uiso | 1.00 |
| Ti160 | Ti | 0.09661  | 0.49914 | 0.93219 | 0.00000 | Uiso | 1.00 |
| O161  | O  | 0.20384  | 0.50022 | 0.86731 | 0.00000 | Uiso | 1.00 |
| O162  | O  | 0.10146  | 0.62644 | 0.92379 | 0.00000 | Uiso | 1.00 |
| O163  | O  | 0.15389  | 0.64721 | 0.88583 | 0.00000 | Uiso | 1.00 |
| O164  | O  | 0.04497  | 0.49052 | 0.94478 | 0.00000 | Uiso | 1.00 |
| O165  | O  | 0.14491  | 0.49953 | 0.91681 | 0.00000 | Uiso | 1.00 |
| O166  | O  | 0.24880  | 0.62713 | 0.86167 | 0.00000 | Uiso | 1.00 |
| O167  | O  | 0.20668  | 0.59941 | 0.91361 | 0.00000 | Uiso | 1.00 |
| O168  | O  | 0.07023  | 0.47211 | 0.89872 | 0.00000 | Uiso | 1.00 |
| Ti169 | Ti | 0.28745  | 0.74540 | 0.94875 | 0.00000 | Uiso | 1.00 |
| Ti170 | Ti | 0.13237  | 0.87076 | 0.85236 | 0.00000 | Uiso | 1.00 |
| Ti171 | Ti | 0.22991  | 0.87622 | 0.94394 | 0.00000 | Uiso | 1.00 |
| Ti172 | Ti | 0.07300  | 0.74780 | 0.85960 | 0.00000 | Uiso | 1.00 |
| O173  | O  | 0.23840  | 0.75217 | 0.95756 | 0.00000 | Uiso | 1.00 |
| O174  | O  | 0.08262  | 0.87204 | 0.84085 | 0.00000 | Uiso | 1.00 |
| O175  | O  | 0.18202  | 0.89154 | 0.96094 | 0.00000 | Uiso | 1.00 |
| O176  | O  | 0.02378  | 0.72300 | 0.86964 | 0.00000 | Uiso | 1.00 |
| O177  | O  | 0.12049  | 0.74627 | 0.86852 | 0.00000 | Uiso | 1.00 |
| O178  | O  | 0.28272  | 0.87379 | 0.93550 | 0.00000 | Uiso | 1.00 |
| O179  | O  | 0.18008  | 0.84814 | 0.83802 | 0.00000 | Uiso | 1.00 |
| O180  | O  | 0.11560  | 0.72431 | 0.97159 | 0.00000 | Uiso | 1.00 |
| Ti181 | Ti | 0.26255  | 0.74998 | 0.87747 | 0.00000 | Uiso | 1.00 |
| Ti182 | Ti | 0.15712  | 0.88103 | 0.92537 | 0.00000 | Uiso | 1.00 |
| Ti183 | Ti | 0.19905  | 0.86917 | 0.87559 | 0.00000 | Uiso | 1.00 |
| Ti184 | Ti | 0.10000  | 0.75118 | 0.93434 | 0.00000 | Uiso | 1.00 |
| O185  | O  | 0.21177  | 0.75045 | 0.88811 | 0.00000 | Uiso | 1.00 |
| O186  | O  | 0.10832  | 0.87540 | 0.94108 | 0.00000 | Uiso | 1.00 |
| O187  | O  | 0.15037  | 0.85468 | 0.88774 | 0.00000 | Uiso | 1.00 |
| O188  | O  | 0.04833  | 0.76126 | 0.94614 | 0.00000 | Uiso | 1.00 |
| O189  | O  | 0.15374  | 0.75002 | 0.92832 | 0.00000 | Uiso | 1.00 |
| O190  | O  | 0.24699  | 0.87285 | 0.86446 | 0.00000 | Uiso | 1.00 |
| O191  | O  | 0.20508  | 0.90446 | 0.91178 | 0.00000 | Uiso | 1.00 |
| O192  | O  | 0.07391  | 0.77655 | 0.89896 | 0.00000 | Uiso | 1.00 |
| Ti193 | Ti | -0.00744 | 0.00325 | 0.83905 | 0.00000 | Uiso | 1.00 |
| Ti194 | Ti | 0.89034  | 0.12880 | 0.88949 | 0.00000 | Uiso | 1.00 |
| Ti195 | Ti | 0.93610  | 0.12234 | 0.84667 | 0.00000 | Uiso | 1.00 |
| Ti196 | Ti | 0.83305  | 0.00420 | 0.90253 | 0.00000 | Uiso | 1.00 |
| O197  | O  | 0.95145  | 0.00188 | 0.86092 | 0.00000 | Uiso | 1.00 |
| O198  | O  | 0.83861  | 0.12291 | 0.89179 | 0.00000 | Uiso | 1.00 |
| O199  | O  | 0.88617  | 0.10904 | 0.84928 | 0.00000 | Uiso | 1.00 |
| O200  | O  | 0.78356  | 0.03595 | 0.91226 | 0.00000 | Uiso | 1.00 |

|       |    |          |          |         |         |      |      |
|-------|----|----------|----------|---------|---------|------|------|
| O201  | O  | 0.88730  | -0.00105 | 0.89844 | 0.00000 | Uiso | 1.00 |
| O202  | O  | 0.97669  | 0.12622  | 0.82282 | 0.00000 | Uiso | 1.00 |
| O203  | O  | 0.94112  | 0.15355  | 0.88361 | 0.00000 | Uiso | 1.00 |
| O204  | O  | 0.80822  | -0.02056 | 0.86713 | 0.00000 | Uiso | 1.00 |
| Ti205 | Ti | 0.02034  | -0.00332 | 0.90717 | 0.00000 | Uiso | 1.00 |
| Ti206 | Ti | 0.91246  | 0.12069  | 0.96216 | 0.00000 | Uiso | 1.00 |
| Ti207 | Ti | 0.96388  | 0.12868  | 0.91917 | 0.00000 | Uiso | 1.00 |
| Ti208 | Ti | 0.85550  | -0.00101 | 0.97592 | 0.00000 | Uiso | 1.00 |
| O209  | O  | 0.96571  | 0.00115  | 0.91056 | 0.00000 | Uiso | 1.00 |
| O210  | O  | 0.87353  | 0.12475  | 0.98944 | 0.00000 | Uiso | 1.00 |
| O211  | O  | 0.91259  | 0.15249  | 0.92491 | 0.00000 | Uiso | 1.00 |
| O212  | O  | 0.80558  | -0.02681 | 0.98536 | 0.00000 | Uiso | 1.00 |
| O213  | O  | 0.89392  | -0.00118 | 0.95008 | 0.00000 | Uiso | 1.00 |
| O214  | O  | 0.01816  | 0.12331  | 0.91575 | 0.00000 | Uiso | 1.00 |
| O215  | O  | 0.96378  | 0.10782  | 0.96008 | 0.00000 | Uiso | 1.00 |
| O216  | O  | 0.83563  | 0.03115  | 0.94097 | 0.00000 | Uiso | 1.00 |
| Ti217 | Ti | -0.00903 | 0.25062  | 0.83973 | 0.00000 | Uiso | 1.00 |
| Ti218 | Ti | 0.88826  | 0.37000  | 0.89294 | 0.00000 | Uiso | 1.00 |
| Ti219 | Ti | 0.93399  | 0.38216  | 0.84665 | 0.00000 | Uiso | 1.00 |
| Ti220 | Ti | 0.82889  | 0.24506  | 0.89939 | 0.00000 | Uiso | 1.00 |
| O221  | O  | 0.94754  | 0.25228  | 0.85815 | 0.00000 | Uiso | 1.00 |
| O222  | O  | 0.83761  | 0.37461  | 0.90859 | 0.00000 | Uiso | 1.00 |
| O223  | O  | 0.88253  | 0.39385  | 0.85276 | 0.00000 | Uiso | 1.00 |
| O224  | O  | 0.77915  | 0.21877  | 0.91136 | 0.00000 | Uiso | 1.00 |
| O225  | O  | 0.87741  | 0.25105  | 0.88490 | 0.00000 | Uiso | 1.00 |
| O226  | O  | 0.97755  | 0.37777  | 0.82489 | 0.00000 | Uiso | 1.00 |
| O227  | O  | 0.93726  | 0.34489  | 0.88262 | 0.00000 | Uiso | 1.00 |
| O228  | O  | 0.80784  | 0.26239  | 0.86197 | 0.00000 | Uiso | 1.00 |
| Ti229 | Ti | 0.02464  | 0.25299  | 0.90959 | 0.00000 | Uiso | 1.00 |
| Ti230 | Ti | 0.91501  | 0.38131  | 0.96223 | 0.00000 | Uiso | 1.00 |
| Ti231 | Ti | 0.96172  | 0.36990  | 0.91638 | 0.00000 | Uiso | 1.00 |
| Ti232 | Ti | 0.85659  | 0.25125  | 0.97471 | 0.00000 | Uiso | 1.00 |
| O233  | O  | 0.97533  | 0.24957  | 0.92435 | 0.00000 | Uiso | 1.00 |
| O234  | O  | 0.87587  | 0.37576  | 0.98764 | 0.00000 | Uiso | 1.00 |
| O235  | O  | 0.91274  | 0.34330  | 0.92649 | 0.00000 | Uiso | 1.00 |
| O236  | O  | 0.80748  | 0.27850  | 0.98499 | 0.00000 | Uiso | 1.00 |
| O237  | O  | 0.89826  | 0.25237  | 0.95324 | 0.00000 | Uiso | 1.00 |
| O238  | O  | 0.01102  | 0.37445  | 0.90119 | 0.00000 | Uiso | 1.00 |
| O239  | O  | 0.96672  | 0.39331  | 0.95668 | 0.00000 | Uiso | 1.00 |
| O240  | O  | 0.83604  | 0.22394  | 0.93848 | 0.00000 | Uiso | 1.00 |
| Ti241 | Ti | 0.75789  | -0.00246 | 0.88116 | 0.00000 | Uiso | 1.00 |
| Ti242 | Ti | 0.65660  | 0.12796  | 0.92722 | 0.00000 | Uiso | 1.00 |
| Ti243 | Ti | 0.69767  | 0.12390  | 0.87701 | 0.00000 | Uiso | 1.00 |
| Ti244 | Ti | 0.59848  | -0.00059 | 0.93203 | 0.00000 | Uiso | 1.00 |
| O245  | O  | 0.70500  | -0.00436 | 0.89078 | 0.00000 | Uiso | 1.00 |
| O246  | O  | 0.60705  | 0.12165  | 0.94156 | 0.00000 | Uiso | 1.00 |
| O247  | O  | 0.64981  | 0.15412  | 0.88946 | 0.00000 | Uiso | 1.00 |
| O248  | O  | 0.54822  | 0.00812  | 0.94717 | 0.00000 | Uiso | 1.00 |
| O249  | O  | 0.64900  | -0.00061 | 0.91593 | 0.00000 | Uiso | 1.00 |
| O250  | O  | 0.74549  | 0.11582  | 0.86335 | 0.00000 | Uiso | 1.00 |
| O251  | O  | 0.70660  | 0.15453  | 0.91478 | 0.00000 | Uiso | 1.00 |

|       |    |         |          |         |         |      |      |
|-------|----|---------|----------|---------|---------|------|------|
| O252  | O  | 0.57031 | 0.02694  | 0.89880 | 0.00000 | Uiso | 1.00 |
| Ti253 | Ti | 0.78783 | 0.00397  | 0.94916 | 0.00000 | Uiso | 1.00 |
| Ti254 | Ti | 0.62916 | 0.11474  | 0.85653 | 0.00000 | Uiso | 1.00 |
| Ti255 | Ti | 0.72714 | 0.12693  | 0.95066 | 0.00000 | Uiso | 1.00 |
| Ti256 | Ti | 0.56883 | -0.00437 | 0.86032 | 0.00000 | Uiso | 1.00 |
| O257  | O  | 0.73993 | -0.00306 | 0.95797 | 0.00000 | Uiso | 1.00 |
| O258  | O  | 0.58047 | 0.12013  | 0.84243 | 0.00000 | Uiso | 1.00 |
| O259  | O  | 0.67846 | 0.10883  | 0.96435 | 0.00000 | Uiso | 1.00 |
| O260  | O  | 0.51869 | -0.02385 | 0.87119 | 0.00000 | Uiso | 1.00 |
| O261  | O  | 0.61564 | -0.00523 | 0.87376 | 0.00000 | Uiso | 1.00 |
| O262  | O  | 0.77898 | 0.12657  | 0.96106 | 0.00000 | Uiso | 1.00 |
| O263  | O  | 0.67607 | 0.09449  | 0.84089 | 0.00000 | Uiso | 1.00 |
| O264  | O  | 0.61905 | -0.02848 | 0.96732 | 0.00000 | Uiso | 1.00 |
| Ti265 | Ti | 0.75884 | 0.24562  | 0.87512 | 0.00000 | Uiso | 1.00 |
| Ti266 | Ti | 0.65358 | 0.36865  | 0.92332 | 0.00000 | Uiso | 1.00 |
| Ti267 | Ti | 0.69825 | 0.36787  | 0.87660 | 0.00000 | Uiso | 1.00 |
| Ti268 | Ti | 0.59431 | 0.24789  | 0.93645 | 0.00000 | Uiso | 1.00 |
| O269  | O  | 0.70722 | 0.24597  | 0.86465 | 0.00000 | Uiso | 1.00 |
| O270  | O  | 0.59966 | 0.37356  | 0.92379 | 0.00000 | Uiso | 1.00 |
| O271  | O  | 0.65131 | 0.33538  | 0.88659 | 0.00000 | Uiso | 1.00 |
| O272  | O  | 0.54116 | 0.23619  | 0.94529 | 0.00000 | Uiso | 1.00 |
| O273  | O  | 0.64667 | 0.24989  | 0.93450 | 0.00000 | Uiso | 1.00 |
| O274  | O  | 0.74619 | 0.37582  | 0.86696 | 0.00000 | Uiso | 1.00 |
| O275  | O  | 0.70321 | 0.33541  | 0.91344 | 0.00000 | Uiso | 1.00 |
| O276  | O  | 0.57014 | 0.22093  | 0.90072 | 0.00000 | Uiso | 1.00 |
| Ti277 | Ti | 0.78779 | 0.24945  | 0.94912 | 0.00000 | Uiso | 1.00 |
| Ti278 | Ti | 0.63082 | 0.37894  | 0.85531 | 0.00000 | Uiso | 1.00 |
| Ti279 | Ti | 0.72863 | 0.37495  | 0.94415 | 0.00000 | Uiso | 1.00 |
| Ti280 | Ti | 0.57249 | 0.24610  | 0.86089 | 0.00000 | Uiso | 1.00 |
| O281  | O  | 0.74010 | 0.25686  | 0.96222 | 0.00000 | Uiso | 1.00 |
| O282  | O  | 0.58297 | 0.37128  | 0.84324 | 0.00000 | Uiso | 1.00 |
| O283  | O  | 0.67929 | 0.39486  | 0.95835 | 0.00000 | Uiso | 1.00 |
| O284  | O  | 0.52427 | 0.27825  | 0.86902 | 0.00000 | Uiso | 1.00 |
| O285  | O  | 0.62040 | 0.24829  | 0.86865 | 0.00000 | Uiso | 1.00 |
| O286  | O  | 0.78144 | 0.37674  | 0.93516 | 0.00000 | Uiso | 1.00 |
| O287  | O  | 0.67833 | 0.39941  | 0.84019 | 0.00000 | Uiso | 1.00 |
| O288  | O  | 0.60702 | 0.27622  | 0.97438 | 0.00000 | Uiso | 1.00 |
| Ti289 | Ti | 0.52264 | 0.00293  | 0.91084 | 0.00000 | Uiso | 1.00 |
| Ti290 | Ti | 0.41258 | 0.13208  | 0.96155 | 0.00000 | Uiso | 1.00 |
| Ti291 | Ti | 0.45977 | 0.11921  | 0.91615 | 0.00000 | Uiso | 1.00 |
| Ti292 | Ti | 0.35663 | 0.00091  | 0.97455 | 0.00000 | Uiso | 1.00 |
| O293  | O  | 0.47389 | -0.00091 | 0.92557 | 0.00000 | Uiso | 1.00 |
| O294  | O  | 0.37402 | 0.12690  | 0.98931 | 0.00000 | Uiso | 1.00 |
| O295  | O  | 0.40956 | 0.09441  | 0.92489 | 0.00000 | Uiso | 1.00 |
| O296  | O  | 0.30770 | -0.02557 | 0.98491 | 0.00000 | Uiso | 1.00 |
| O297  | O  | 0.39803 | 0.00002  | 0.95282 | 0.00000 | Uiso | 1.00 |
| O298  | O  | 0.50950 | 0.12369  | 0.90236 | 0.00000 | Uiso | 1.00 |
| O299  | O  | 0.46407 | 0.14523  | 0.95633 | 0.00000 | Uiso | 1.00 |
| O300  | O  | 0.33654 | 0.02741  | 0.93812 | 0.00000 | Uiso | 1.00 |
| Ti301 | Ti | 0.48655 | -0.00306 | 0.83970 | 0.00000 | Uiso | 1.00 |
| Ti302 | Ti | 0.38957 | 0.11909  | 0.88879 | 0.00000 | Uiso | 1.00 |



|       |    |         |          |         |         |      |      |
|-------|----|---------|----------|---------|---------|------|------|
| Ti303 | Ti | 0.43370 | 0.12845  | 0.84487 | 0.00000 | Uiso | 1.00 |
| Ti304 | Ti | 0.32923 | 0.00240  | 0.89925 | 0.00000 | Uiso | 1.00 |
| O305  | O  | 0.43536 | -0.00474 | 0.83506 | 0.00000 | Uiso | 1.00 |
| O306  | O  | 0.33816 | 0.12550  | 0.89169 | 0.00000 | Uiso | 1.00 |
| O307  | O  | 0.38424 | 0.14462  | 0.84926 | 0.00000 | Uiso | 1.00 |
| O308  | O  | 0.27949 | 0.02793  | 0.91111 | 0.00000 | Uiso | 1.00 |
| O309  | O  | 0.37768 | -0.00258 | 0.88401 | 0.00000 | Uiso | 1.00 |
| O310  | O  | 0.47883 | 0.12595  | 0.82596 | 0.00000 | Uiso | 1.00 |
| O311  | O  | 0.43914 | 0.08798  | 0.88105 | 0.00000 | Uiso | 1.00 |
| O312  | O  | 0.30712 | -0.01841 | 0.86241 | 0.00000 | Uiso | 1.00 |
| Ti313 | Ti | 0.51958 | 0.24570  | 0.90770 | 0.00000 | Uiso | 1.00 |
| Ti314 | Ti | 0.41335 | 0.37042  | 0.96192 | 0.00000 | Uiso | 1.00 |
| Ti315 | Ti | 0.46367 | 0.37854  | 0.91879 | 0.00000 | Uiso | 1.00 |
| Ti316 | Ti | 0.35484 | 0.25151  | 0.97596 | 0.00000 | Uiso | 1.00 |
| O317  | O  | 0.46486 | 0.25093  | 0.90961 | 0.00000 | Uiso | 1.00 |
| O318  | O  | 0.37480 | 0.37573  | 0.98751 | 0.00000 | Uiso | 1.00 |
| O319  | O  | 0.41394 | 0.40618  | 0.92580 | 0.00000 | Uiso | 1.00 |
| O320  | O  | 0.30462 | 0.27417  | 0.98539 | 0.00000 | Uiso | 1.00 |
| O321  | O  | 0.39276 | 0.25296  | 0.94973 | 0.00000 | Uiso | 1.00 |
| O322  | O  | 0.51768 | 0.37241  | 0.91603 | 0.00000 | Uiso | 1.00 |
| O323  | O  | 0.46427 | 0.35473  | 0.95937 | 0.00000 | Uiso | 1.00 |
| O324  | O  | 0.33511 | 0.21709  | 0.94119 | 0.00000 | Uiso | 1.00 |
| Ti325 | Ti | 0.49130 | 0.24832  | 0.84125 | 0.00000 | Uiso | 1.00 |
| Ti326 | Ti | 0.38921 | 0.37813  | 0.89313 | 0.00000 | Uiso | 1.00 |
| Ti327 | Ti | 0.43147 | 0.36511  | 0.84672 | 0.00000 | Uiso | 1.00 |
| Ti328 | Ti | 0.33389 | 0.24459  | 0.90267 | 0.00000 | Uiso | 1.00 |
| O329  | O  | 0.44878 | 0.24606  | 0.86064 | 0.00000 | Uiso | 1.00 |
| O330  | O  | 0.33882 | 0.37363  | 0.90926 | 0.00000 | Uiso | 1.00 |
| O331  | O  | 0.38104 | 0.35207  | 0.85394 | 0.00000 | Uiso | 1.00 |
| O332  | O  | 0.28397 | 0.21645  | 0.91116 | 0.00000 | Uiso | 1.00 |
| O333  | O  | 0.38821 | 0.24845  | 0.89873 | 0.00000 | Uiso | 1.00 |
| O334  | O  | 0.47452 | 0.36493  | 0.82461 | 0.00000 | Uiso | 1.00 |
| O335  | O  | 0.43941 | 0.40617  | 0.88287 | 0.00000 | Uiso | 1.00 |
| O336  | O  | 0.31298 | 0.26986  | 0.86609 | 0.00000 | Uiso | 1.00 |
| Ti337 | Ti | 0.28843 | 0.00088  | 0.94879 | 0.00000 | Uiso | 1.00 |
| Ti338 | Ti | 0.13397 | 0.12430  | 0.85211 | 0.00000 | Uiso | 1.00 |
| Ti339 | Ti | 0.22572 | 0.11979  | 0.95023 | 0.00000 | Uiso | 1.00 |
| Ti340 | Ti | 0.07484 | -0.00201 | 0.85956 | 0.00000 | Uiso | 1.00 |
| O341  | O  | 0.24157 | -0.00735 | 0.96142 | 0.00000 | Uiso | 1.00 |
| O342  | O  | 0.08518 | 0.12380  | 0.84214 | 0.00000 | Uiso | 1.00 |
| O343  | O  | 0.17492 | 0.10803  | 0.96145 | 0.00000 | Uiso | 1.00 |
| O344  | O  | 0.02600 | 0.02853  | 0.86776 | 0.00000 | Uiso | 1.00 |
| O345  | O  | 0.12390 | -0.00131 | 0.86761 | 0.00000 | Uiso | 1.00 |
| O346  | O  | 0.27787 | 0.12247  | 0.96012 | 0.00000 | Uiso | 1.00 |
| O347  | O  | 0.18140 | 0.14841  | 0.83744 | 0.00000 | Uiso | 1.00 |
| O348  | O  | 0.11568 | 0.02570  | 0.96813 | 0.00000 | Uiso | 1.00 |
| Ti349 | Ti | 0.25773 | -0.00014 | 0.87534 | 0.00000 | Uiso | 1.00 |
| Ti350 | Ti | 0.15534 | 0.12023  | 0.92273 | 0.00000 | Uiso | 1.00 |
| Ti351 | Ti | 0.20099 | 0.13072  | 0.87511 | 0.00000 | Uiso | 1.00 |
| Ti352 | Ti | 0.09662 | -0.00094 | 0.93218 | 0.00000 | Uiso | 1.00 |
| O353  | O  | 0.20388 | -0.00002 | 0.86725 | 0.00000 | Uiso | 1.00 |

|       |    |          |          |         |         |      |      |
|-------|----|----------|----------|---------|---------|------|------|
| O354  | O  | 0.10143  | 0.12635  | 0.92379 | 0.00000 | Uiso | 1.00 |
| O355  | O  | 0.15380  | 0.14683  | 0.88580 | 0.00000 | Uiso | 1.00 |
| O356  | O  | 0.04498  | -0.00959 | 0.94478 | 0.00000 | Uiso | 1.00 |
| O357  | O  | 0.14491  | -0.00053 | 0.91678 | 0.00000 | Uiso | 1.00 |
| O358  | O  | 0.24871  | 0.12719  | 0.86165 | 0.00000 | Uiso | 1.00 |
| O359  | O  | 0.20664  | 0.09944  | 0.91359 | 0.00000 | Uiso | 1.00 |
| O360  | O  | 0.07023  | -0.02798 | 0.89872 | 0.00000 | Uiso | 1.00 |
| Ti361 | Ti | 0.28708  | 0.24524  | 0.94891 | 0.00000 | Uiso | 1.00 |
| Ti362 | Ti | 0.13231  | 0.37080  | 0.85234 | 0.00000 | Uiso | 1.00 |
| Ti363 | Ti | 0.22968  | 0.37628  | 0.94412 | 0.00000 | Uiso | 1.00 |
| Ti364 | Ti | 0.07297  | 0.24780  | 0.85959 | 0.00000 | Uiso | 1.00 |
| O365  | O  | 0.23809  | 0.25204  | 0.95777 | 0.00000 | Uiso | 1.00 |
| O366  | O  | 0.08257  | 0.37210  | 0.84085 | 0.00000 | Uiso | 1.00 |
| O367  | O  | 0.18177  | 0.39161  | 0.96102 | 0.00000 | Uiso | 1.00 |
| O368  | O  | 0.02376  | 0.22300  | 0.86964 | 0.00000 | Uiso | 1.00 |
| O369  | O  | 0.12048  | 0.24626  | 0.86848 | 0.00000 | Uiso | 1.00 |
| O370  | O  | 0.28240  | 0.37371  | 0.93571 | 0.00000 | Uiso | 1.00 |
| O371  | O  | 0.18003  | 0.34844  | 0.83802 | 0.00000 | Uiso | 1.00 |
| O372  | O  | 0.11556  | 0.22432  | 0.97159 | 0.00000 | Uiso | 1.00 |
| Ti373 | Ti | 0.26217  | 0.25001  | 0.87756 | 0.00000 | Uiso | 1.00 |
| Ti374 | Ti | 0.15704  | 0.38103  | 0.92539 | 0.00000 | Uiso | 1.00 |
| Ti375 | Ti | 0.19893  | 0.36938  | 0.87561 | 0.00000 | Uiso | 1.00 |
| Ti376 | Ti | 0.09995  | 0.25115  | 0.93434 | 0.00000 | Uiso | 1.00 |
| O377  | O  | 0.21142  | 0.25044  | 0.88805 | 0.00000 | Uiso | 1.00 |
| O378  | O  | 0.10824  | 0.37542  | 0.94106 | 0.00000 | Uiso | 1.00 |
| O379  | O  | 0.15023  | 0.35507  | 0.88775 | 0.00000 | Uiso | 1.00 |
| O380  | O  | 0.04829  | 0.26122  | 0.94614 | 0.00000 | Uiso | 1.00 |
| O381  | O  | 0.15368  | 0.24999  | 0.92831 | 0.00000 | Uiso | 1.00 |
| O382  | O  | 0.24686  | 0.37295  | 0.86453 | 0.00000 | Uiso | 1.00 |
| O383  | O  | 0.20500  | 0.40434  | 0.91186 | 0.00000 | Uiso | 1.00 |
| O384  | O  | 0.07389  | 0.27649  | 0.89896 | 0.00000 | Uiso | 1.00 |
| C385  | C  | -0.60062 | -0.22258 | 0.51138 | 0.00000 | Uiso | 1.00 |
| C386  | C  | -0.59930 | -0.24113 | 0.53623 | 0.00000 | Uiso | 1.00 |
| C387  | C  | -0.59768 | -0.26089 | 0.56338 | 0.00000 | Uiso | 1.00 |
| C388  | C  | -0.59600 | -0.27843 | 0.58820 | 0.00000 | Uiso | 1.00 |
| C389  | C  | -0.59390 | -0.29704 | 0.61545 | 0.00000 | Uiso | 1.00 |
| C390  | C  | -0.59173 | -0.31347 | 0.64041 | 0.00000 | Uiso | 1.00 |
| C391  | C  | -0.58900 | -0.33101 | 0.66829 | 0.00000 | Uiso | 1.00 |
| C392  | C  | -0.58300 | -0.41102 | 0.67846 | 0.00000 | Uiso | 1.00 |
| S393  | S  | -0.59186 | -0.24647 | 0.69471 | 0.00000 | Uiso | 1.00 |
| C394  | C  | -0.58014 | -0.41293 | 0.70737 | 0.00000 | Uiso | 1.00 |
| H395  | H  | -0.58027 | -0.46943 | 0.66543 | 0.00000 | Uiso | 1.00 |
| C396  | C  | -0.58397 | -0.33443 | 0.71981 | 0.00000 | Uiso | 1.00 |
| H397  | H  | -0.57494 | -0.47366 | 0.71873 | 0.00000 | Uiso | 1.00 |
| C398  | C  | -0.58071 | -0.32533 | 0.74897 | 0.00000 | Uiso | 1.00 |
| H399  | H  | -0.57411 | -0.38564 | 0.76011 | 0.00000 | Uiso | 1.00 |
| C400  | C  | -0.58426 | -0.25040 | 0.76463 | 0.00000 | Uiso | 1.00 |
| C401  | C  | -0.59369 | -0.17044 | 0.75342 | 0.00000 | Uiso | 1.00 |
| C402  | C  | -0.57748 | -0.25195 | 0.79515 | 0.00000 | Uiso | 1.00 |
| O403  | O  | -0.57072 | -0.32704 | 0.80660 | 0.00000 | Uiso | 1.00 |
| O404  | O  | -0.57789 | -0.18052 | 0.80759 | 0.00000 | Uiso | 1.00 |

|       |    |          |          |         |         |      |      |
|-------|----|----------|----------|---------|---------|------|------|
| N405  | N  | -0.60166 | -0.10120 | 0.74480 | 0.00000 | Uiso | 1.00 |
| C406  | C  | -0.60196 | -0.20131 | 0.48365 | 0.00000 | Uiso | 1.00 |
| C407  | C  | -0.61504 | -0.12585 | 0.47427 | 0.00000 | Uiso | 1.00 |
| S408  | S  | -0.58526 | -0.27243 | 0.45649 | 0.00000 | Uiso | 1.00 |
| C409  | C  | -0.61325 | -0.11731 | 0.44543 | 0.00000 | Uiso | 1.00 |
| H410  | H  | -0.62587 | -0.07531 | 0.48784 | 0.00000 | Uiso | 1.00 |
| C411  | C  | -0.59901 | -0.18636 | 0.43260 | 0.00000 | Uiso | 1.00 |
| H412  | H  | -0.62246 | -0.05934 | 0.43436 | 0.00000 | Uiso | 1.00 |
| H413  | H  | -0.59926 | -0.13148 | 0.39262 | 0.00000 | Uiso | 1.00 |
| C414  | C  | -0.57972 | -0.26205 | 0.38963 | 0.00000 | Uiso | 1.00 |
| C415  | C  | -0.56304 | -0.25697 | 0.36542 | 0.00000 | Uiso | 1.00 |
| C416  | C  | -0.55784 | -0.34305 | 0.35628 | 0.00000 | Uiso | 1.00 |
| H417  | H  | -0.55554 | -0.19691 | 0.35468 | 0.00000 | Uiso | 1.00 |
| C418  | C  | -0.57220 | -0.39752 | 0.37487 | 0.00000 | Uiso | 1.00 |
| H419  | H  | -0.54487 | -0.36274 | 0.33711 | 0.00000 | Uiso | 1.00 |
| H420  | H  | -0.57268 | -0.46906 | 0.37322 | 0.00000 | Uiso | 1.00 |
| N421  | N  | -0.59387 | -0.18813 | 0.40438 | 0.00000 | Uiso | 1.00 |
| N422  | N  | -0.58668 | -0.35164 | 0.39608 | 0.00000 | Uiso | 1.00 |
| H423  | H  | -0.60044 | -0.37649 | 0.41321 | 0.00000 | Uiso | 1.00 |
| Cl424 | Cl | 5.00000  | 5.00000  | 5.00000 | 0.00000 | Uiso | 1.00 |
| H425  | H  | 0.36439  | 0.66366  | 0.83637 | 0.00000 | Uiso | 1.00 |

loop\_

\_geom\_bond\_atom\_site\_label\_1

\_geom\_bond\_atom\_site\_label\_2

\_geom\_bond\_distance

\_geom\_bond\_site\_symmetry\_2

\_ccdc\_geom\_bond\_type

Ti1 O5 1.900 1\_455 S

Ti1 O10 2.103 1\_455 S

Ti1 O152 1.919 . S

Ti1 O226 2.093 1\_455 S

Ti2 O6 2.006 . S

Ti2 O11 2.019 . S

Ti2 O9 2.010 . S

Ti2 O19 1.924 . S

Ti2 O7 1.941 . S

Ti2 O33 1.925 . S

Ti3 O7 1.946 . S

Ti3 O10 1.938 . S

Ti3 O5 2.030 . S

Ti3 O29 2.085 . S

Ti3 O11 1.828 . S

Ti4 O8 2.027 . S

Ti4 O9 2.109 . S

Ti4 O24 1.874 . S

Ti4 O6 1.877 . S

Ti4 O222 1.987 . S

Ti4 O12 1.973 . S

O5 Ti1 1.900 1\_655 S

O5 Ti219 2.046 . S

O6 Ti28 1.917 . S

|      |       |       |       |   |
|------|-------|-------|-------|---|
| O8   | Ti61  | 1.827 | .     | S |
| O8   | Ti49  | 1.873 | .     | S |
| O9   | Ti218 | 1.966 | .     | S |
| O10  | Ti1   | 2.103 | 1_655 | S |
| O10  | Ti25  | 2.117 | 1_655 | S |
| O11  | Ti15  | 1.942 | .     | S |
| O12  | Ti49  | 2.077 | .     | S |
| Ti13 | O17   | 2.121 | 1_455 | S |
| Ti13 | O168  | 2.006 | .     | S |
| Ti13 | O22   | 1.957 | .     | S |
| Ti13 | O152  | 1.946 | .     | S |
| Ti13 | O164  | 2.028 | .     | S |
| Ti13 | O238  | 1.903 | .     | S |
| Ti14 | O18   | 1.988 | .     | S |
| Ti14 | O23   | 1.997 | .     | S |
| Ti14 | O21   | 2.057 | .     | S |
| Ti14 | O19   | 1.834 | .     | S |
| Ti14 | O45   | 2.107 | .     | S |
| Ti15 | O19   | 2.035 | .     | S |
| Ti15 | O22   | 2.108 | 1_655 | S |
| Ti15 | O17   | 1.970 | .     | S |
| Ti15 | O41   | 1.895 | .     | S |
| Ti15 | O23   | 1.970 | .     | S |
| Ti16 | O20   | 2.020 | .     | S |
| Ti16 | O21   | 1.928 | .     | S |
| Ti16 | O18   | 2.123 | .     | S |
| Ti16 | O234  | 2.097 | .     | S |
| Ti16 | O24   | 1.893 | .     | S |
| O17  | Ti13  | 2.121 | 1_655 | S |
| O17  | Ti231 | 2.008 | .     | S |
| O18  | Ti40  | 2.138 | .     | S |
| O20  | Ti61  | 1.909 | .     | S |
| O21  | Ti230 | 2.037 | .     | S |
| O22  | Ti15  | 2.108 | 1_455 | S |
| O22  | Ti37  | 1.996 | .     | S |
| O24  | Ti61  | 1.934 | .     | S |
| Ti25 | O29   | 1.895 | 1_455 | S |
| Ti25 | O34   | 2.111 | 1_455 | S |
| Ti25 | O176  | 1.950 | .     | S |
| Ti25 | O10   | 2.117 | 1_455 | S |
| Ti26 | O30   | 2.097 | .     | S |
| Ti26 | O35   | 1.994 | .     | S |
| Ti26 | O33   | 1.884 | .     | S |
| Ti26 | O43   | 1.898 | .     | S |
| Ti26 | O31   | 1.956 | .     | S |
| Ti26 | O201  | 1.966 | 1_565 | S |
| Ti27 | O31   | 2.020 | .     | S |
| Ti27 | O34   | 1.978 | .     | S |
| Ti27 | O29   | 2.103 | .     | S |
| Ti27 | O197  | 2.046 | 1_565 | S |
| Ti27 | O35   | 1.804 | .     | S |

|      |       |       |       |   |
|------|-------|-------|-------|---|
| Ti28 | O32   | 2.046 | .     | S |
| Ti28 | O33   | 2.002 | .     | S |
| Ti28 | O48   | 1.905 | .     | S |
| Ti28 | O30   | 2.033 | .     | S |
| Ti28 | O36   | 1.974 | .     | S |
| O29  | Ti25  | 1.895 | 1_655 | S |
| O30  | Ti196 | 1.986 | 1_565 | S |
| O32  | Ti85  | 1.884 | .     | S |
| O32  | Ti73  | 1.937 | .     | S |
| O34  | Ti25  | 2.111 | 1_655 | S |
| O34  | Ti193 | 2.093 | 1_665 | S |
| O35  | Ti39  | 1.901 | .     | S |
| O36  | Ti73  | 2.013 | .     | S |
| Ti37 | O41   | 2.033 | 1_455 | S |
| Ti37 | O192  | 2.003 | .     | S |
| Ti37 | O46   | 1.950 | .     | S |
| Ti37 | O176  | 1.952 | .     | S |
| Ti37 | O188  | 1.967 | .     | S |
| Ti38 | O42   | 1.939 | .     | S |
| Ti38 | O47   | 2.026 | .     | S |
| Ti38 | O45   | 2.096 | .     | S |
| Ti38 | O43   | 1.795 | .     | S |
| Ti38 | O213  | 2.037 | 1_565 | S |
| Ti39 | O43   | 1.996 | .     | S |
| Ti39 | O46   | 2.041 | 1_655 | S |
| Ti39 | O41   | 1.930 | .     | S |
| Ti39 | O209  | 2.008 | 1_565 | S |
| Ti39 | O47   | 1.957 | .     | S |
| Ti40 | O44   | 2.004 | .     | S |
| Ti40 | O45   | 1.908 | .     | S |
| Ti40 | O42   | 2.115 | .     | S |
| Ti40 | O48   | 1.941 | .     | S |
| O41  | Ti37  | 2.033 | 1_655 | S |
| O42  | Ti208 | 2.097 | 1_565 | S |
| O44  | Ti85  | 1.918 | .     | S |
| O46  | Ti39  | 2.041 | 1_455 | S |
| O46  | Ti205 | 1.903 | 1_565 | S |
| O48  | Ti85  | 1.972 | .     | S |
| Ti49 | O53   | 2.097 | .     | S |
| Ti49 | O58   | 2.035 | .     | S |
| Ti49 | O274  | 2.011 | .     | S |
| Ti50 | O54   | 2.035 | .     | S |
| Ti50 | O59   | 2.061 | .     | S |
| Ti50 | O57   | 2.036 | .     | S |
| Ti50 | O67   | 1.977 | .     | S |
| Ti50 | O55   | 1.855 | .     | S |
| Ti50 | O81   | 1.913 | .     | S |
| Ti51 | O55   | 1.997 | .     | S |
| Ti51 | O58   | 1.966 | .     | S |
| Ti51 | O71   | 1.962 | .     | S |
| Ti51 | O53   | 2.065 | .     | S |

|      |       |       |       |   |
|------|-------|-------|-------|---|
| Ti51 | O77   | 1.970 | .     | S |
| Ti51 | O59   | 1.885 | .     | S |
| Ti52 | O56   | 2.074 | .     | S |
| Ti52 | O57   | 2.098 | .     | S |
| Ti52 | O72   | 1.903 | .     | S |
| Ti52 | O54   | 1.932 | .     | S |
| Ti52 | O270  | 1.937 | .     | S |
| Ti52 | O60   | 1.965 | .     | S |
| O53  | Ti267 | 2.059 | .     | S |
| O54  | Ti76  | 1.983 | .     | S |
| O55  | Ti62  | 1.857 | .     | S |
| O56  | Ti97  | 1.992 | .     | S |
| O57  | Ti266 | 2.013 | .     | S |
| O58  | Ti73  | 2.104 | .     | S |
| O59  | Ti63  | 1.927 | .     | S |
| O60  | Ti97  | 1.965 | .     | S |
| O60  | Ti64  | 1.885 | .     | S |
| Ti61 | O65   | 1.903 | .     | S |
| Ti61 | O70   | 1.966 | .     | S |
| Ti61 | O286  | 2.048 | .     | S |
| Ti62 | O66   | 2.007 | .     | S |
| Ti62 | O71   | 1.987 | .     | S |
| Ti62 | O69   | 2.060 | .     | S |
| Ti62 | O93   | 2.128 | .     | S |
| Ti63 | O67   | 2.010 | .     | S |
| Ti63 | O70   | 2.065 | .     | S |
| Ti63 | O65   | 2.054 | .     | S |
| Ti63 | O89   | 2.099 | .     | S |
| Ti64 | O68   | 2.032 | .     | S |
| Ti64 | O69   | 1.920 | .     | S |
| Ti64 | O66   | 2.116 | .     | S |
| Ti64 | O282  | 2.100 | .     | S |
| O65  | Ti279 | 2.003 | .     | S |
| O66  | Ti88  | 2.124 | .     | S |
| O68  | Ti97  | 1.950 | .     | S |
| O68  | Ti109 | 1.973 | .     | S |
| O69  | Ti278 | 2.033 | .     | S |
| O70  | Ti85  | 1.971 | .     | S |
| Ti73 | O77   | 2.059 | .     | S |
| Ti73 | O82   | 2.064 | .     | S |
| Ti74 | O78   | 2.087 | .     | S |
| Ti74 | O83   | 2.039 | .     | S |
| Ti74 | O81   | 1.891 | .     | S |
| Ti74 | O91   | 1.978 | .     | S |
| Ti74 | O79   | 1.818 | .     | S |
| Ti74 | O249  | 2.015 | 1_565 | S |
| Ti75 | O79   | 1.941 | .     | S |
| Ti75 | O82   | 1.916 | .     | S |
| Ti75 | O95   | 1.954 | .     | S |
| Ti75 | O77   | 1.958 | .     | S |
| Ti75 | O245  | 2.060 | 1_565 | S |

|       |       |       |       |   |
|-------|-------|-------|-------|---|
| Ti75  | O83   | 1.828 | .     | S |
| Ti76  | O80   | 2.101 | .     | S |
| Ti76  | O81   | 2.025 | .     | S |
| Ti76  | O96   | 1.917 | .     | S |
| Ti76  | O78   | 2.003 | .     | S |
| Ti76  | O84   | 1.975 | .     | S |
| O78   | Ti244 | 1.940 | 1_565 | S |
| O79   | Ti86  | 1.810 | .     | S |
| O80   | Ti121 | 1.973 | .     | S |
| O82   | Ti241 | 2.012 | 1_565 | S |
| O83   | Ti87  | 1.858 | .     | S |
| O84   | Ti121 | 2.016 | .     | S |
| O84   | Ti88  | 1.930 | .     | S |
| Ti85  | O89   | 1.950 | .     | S |
| Ti85  | O94   | 2.049 | .     | S |
| Ti86  | O90   | 1.944 | .     | S |
| Ti86  | O95   | 1.999 | .     | S |
| Ti86  | O93   | 2.112 | .     | S |
| Ti86  | O261  | 2.035 | 1_565 | S |
| Ti87  | O91   | 2.047 | .     | S |
| Ti87  | O94   | 2.087 | .     | S |
| Ti87  | O89   | 2.029 | .     | S |
| Ti87  | O257  | 2.003 | 1_565 | S |
| Ti88  | O92   | 1.968 | .     | S |
| Ti88  | O93   | 1.891 | .     | S |
| Ti88  | O90   | 2.110 | .     | S |
| O90   | Ti256 | 2.104 | 1_565 | S |
| O92   | Ti121 | 1.858 | .     | S |
| O92   | Ti133 | 1.845 | .     | S |
| O94   | Ti253 | 2.048 | 1_565 | S |
| Ti97  | O101  | 2.011 | .     | S |
| Ti97  | O106  | 1.944 | .     | S |
| Ti97  | O322  | 1.981 | .     | S |
| Ti98  | O102  | 1.995 | .     | S |
| Ti98  | O107  | 2.022 | .     | S |
| Ti98  | O105  | 2.115 | .     | S |
| Ti98  | O103  | 1.833 | .     | S |
| Ti98  | O129  | 2.060 | .     | S |
| Ti99  | O103  | 2.015 | .     | S |
| Ti99  | O106  | 2.031 | .     | S |
| Ti99  | O119  | 1.909 | .     | S |
| Ti99  | O101  | 1.944 | .     | S |
| Ti99  | O125  | 2.027 | .     | S |
| Ti99  | O107  | 1.957 | .     | S |
| Ti100 | O104  | 1.998 | .     | S |
| Ti100 | O105  | 1.906 | .     | S |
| Ti100 | O102  | 2.138 | .     | S |
| Ti100 | O318  | 2.112 | .     | S |
| Ti100 | O108  | 1.938 | .     | S |
| O101  | Ti315 | 1.890 | .     | S |
| O102  | Ti124 | 2.118 | .     | S |

|       |       |       |       |   |
|-------|-------|-------|-------|---|
| O103  | Ti110 | 1.902 | .     | S |
| O104  | Ti145 | 1.914 | .     | S |
| O105  | Ti314 | 2.090 | .     | S |
| O106  | Ti121 | 1.911 | .     | S |
| O108  | Ti145 | 1.969 | .     | S |
| O108  | Ti112 | 1.903 | .     | S |
| Ti109 | O113  | 1.983 | .     | S |
| Ti109 | O118  | 2.042 | .     | S |
| Ti109 | O334  | 2.086 | .     | S |
| Ti110 | O114  | 2.005 | .     | S |
| Ti110 | O119  | 2.023 | .     | S |
| Ti110 | O117  | 1.913 | .     | S |
| Ti110 | O141  | 2.027 | .     | S |
| Ti110 | O115  | 1.866 | .     | S |
| Ti111 | O115  | 1.966 | .     | S |
| Ti111 | O118  | 1.951 | .     | S |
| Ti111 | O113  | 2.064 | .     | S |
| Ti111 | O137  | 1.940 | .     | S |
| Ti111 | O119  | 1.871 | .     | S |
| Ti111 | O403  | 1.891 | 1_665 | S |
| Ti112 | O116  | 2.040 | .     | S |
| Ti112 | O117  | 2.004 | .     | S |
| Ti112 | O114  | 1.927 | .     | S |
| Ti112 | O330  | 2.038 | .     | S |
| Ti112 | O120  | 1.973 | .     | S |
| O113  | Ti327 | 2.082 | .     | S |
| O114  | Ti136 | 1.882 | .     | S |
| O115  | H425  | 1.140 | .     | S |
| O116  | Ti145 | 1.871 | .     | S |
| O116  | Ti157 | 1.944 | .     | S |
| O117  | Ti326 | 1.883 | .     | S |
| O118  | Ti133 | 2.005 | .     | S |
| O120  | Ti157 | 2.025 | .     | S |
| Ti121 | O125  | 2.116 | .     | S |
| Ti121 | O130  | 1.955 | .     | S |
| Ti122 | O126  | 1.928 | .     | S |
| Ti122 | O131  | 1.990 | .     | S |
| Ti122 | O129  | 2.030 | .     | S |
| Ti122 | O127  | 1.800 | .     | S |
| Ti122 | O297  | 2.091 | 1_565 | S |
| Ti123 | O127  | 1.987 | .     | S |
| Ti123 | O130  | 2.092 | .     | S |
| Ti123 | O143  | 2.002 | .     | S |
| Ti123 | O125  | 1.983 | .     | S |
| Ti123 | O293  | 1.891 | 1_565 | S |
| Ti123 | O131  | 1.961 | .     | S |
| Ti124 | O128  | 2.024 | .     | S |
| Ti124 | O129  | 1.927 | .     | S |
| Ti124 | O126  | 2.099 | .     | S |
| Ti124 | O132  | 1.890 | .     | S |
| O126  | Ti292 | 2.111 | 1_565 | S |



|       |       |       |       |   |
|-------|-------|-------|-------|---|
| O127  | Ti134 | 1.854 | .     | S |
| O128  | Ti169 | 1.912 | .     | S |
| O130  | Ti289 | 1.990 | 1_565 | S |
| O132  | Ti169 | 1.944 | .     | S |
| O132  | Ti136 | 1.880 | .     | S |
| Ti133 | O137  | 1.926 | .     | S |
| Ti133 | O142  | 2.006 | .     | S |
| Ti134 | O138  | 2.108 | .     | S |
| Ti134 | O143  | 2.075 | .     | S |
| Ti134 | O141  | 1.996 | .     | S |
| Ti134 | O139  | 1.864 | .     | S |
| Ti134 | O309  | 1.905 | 1_565 | S |
| Ti135 | O139  | 2.012 | .     | S |
| Ti135 | O142  | 1.942 | .     | S |
| Ti135 | O137  | 1.942 | .     | S |
| Ti135 | O305  | 2.061 | 1_565 | S |
| Ti135 | O143  | 1.906 | .     | S |
| Ti135 | O404  | 1.893 | 1_665 | S |
| Ti136 | O140  | 2.023 | .     | S |
| Ti136 | O141  | 2.119 | .     | S |
| Ti136 | O138  | 1.988 | .     | S |
| Ti136 | O144  | 1.958 | .     | S |
| O138  | Ti304 | 2.040 | 1_565 | S |
| O140  | Ti169 | 1.849 | .     | S |
| O140  | Ti181 | 1.878 | .     | S |
| O142  | Ti301 | 2.050 | 1_565 | S |
| O144  | Ti181 | 2.068 | .     | S |
| Ti145 | O149  | 1.913 | .     | S |
| Ti145 | O154  | 1.955 | .     | S |
| Ti145 | O370  | 2.034 | .     | S |
| Ti146 | O150  | 1.947 | .     | S |
| Ti146 | O155  | 1.997 | .     | S |
| Ti146 | O153  | 2.072 | .     | S |
| Ti146 | O163  | 1.808 | .     | S |
| Ti146 | O177  | 2.067 | .     | S |
| Ti147 | O151  | 2.044 | .     | S |
| Ti147 | O154  | 2.074 | .     | S |
| Ti147 | O167  | 1.915 | .     | S |
| Ti147 | O149  | 2.084 | .     | S |
| Ti147 | O173  | 2.084 | .     | S |
| Ti148 | O152  | 1.983 | .     | S |
| Ti148 | O153  | 1.936 | .     | S |
| Ti148 | O168  | 1.910 | .     | S |
| Ti148 | O150  | 2.111 | .     | S |
| Ti148 | O366  | 2.121 | .     | S |
| O149  | Ti363 | 1.999 | .     | S |
| O150  | Ti172 | 2.102 | .     | S |
| O151  | Ti158 | 1.998 | .     | S |
| O153  | Ti362 | 2.089 | .     | S |
| O154  | Ti169 | 1.964 | .     | S |
| O155  | Ti159 | 1.962 | .     | S |

|       |       |       |       |   |
|-------|-------|-------|-------|---|
| O156  | Ti160 | 1.904 | .     | S |
| Ti157 | O161  | 2.119 | .     | S |
| Ti157 | O166  | 2.058 | .     | S |
| Ti157 | O382  | 2.031 | .     | S |
| Ti158 | O162  | 2.089 | .     | S |
| Ti158 | O167  | 2.056 | .     | S |
| Ti158 | O165  | 1.890 | .     | S |
| Ti158 | O163  | 1.802 | .     | S |
| Ti158 | O189  | 1.978 | .     | S |
| Ti159 | O163  | 1.911 | .     | S |
| Ti159 | O166  | 1.954 | .     | S |
| Ti159 | O161  | 2.012 | .     | S |
| Ti159 | O185  | 1.952 | .     | S |
| Ti159 | O167  | 1.901 | .     | S |
| Ti160 | O164  | 2.090 | .     | S |
| Ti160 | O165  | 2.006 | .     | S |
| Ti160 | O162  | 1.973 | .     | S |
| Ti160 | O378  | 1.968 | .     | S |
| Ti160 | O168  | 1.933 | .     | S |
| O161  | Ti375 | 2.024 | .     | S |
| O162  | Ti184 | 1.951 | .     | S |
| O165  | Ti374 | 1.895 | .     | S |
| O166  | Ti181 | 2.071 | .     | S |
| Ti169 | O173  | 1.946 | .     | S |
| Ti169 | O178  | 2.047 | .     | S |
| Ti170 | O174  | 2.001 | .     | S |
| Ti170 | O179  | 1.997 | .     | S |
| Ti170 | O177  | 2.082 | .     | S |
| Ti170 | O187  | 1.836 | .     | S |
| Ti170 | O345  | 2.089 | 1_565 | S |
| Ti171 | O175  | 2.034 | .     | S |
| Ti171 | O178  | 2.082 | .     | S |
| Ti171 | O191  | 1.855 | .     | S |
| Ti171 | O173  | 2.009 | .     | S |
| Ti171 | O341  | 1.996 | 1_565 | S |
| Ti172 | O176  | 1.998 | .     | S |
| Ti172 | O177  | 1.886 | .     | S |
| Ti172 | O192  | 1.921 | .     | S |
| Ti172 | O174  | 2.110 | .     | S |
| O174  | Ti340 | 2.121 | 1_565 | S |
| O175  | Ti182 | 1.952 | .     | S |
| O178  | Ti337 | 2.033 | 1_565 | S |
| O179  | Ti183 | 1.956 | .     | S |
| O180  | Ti184 | 1.913 | .     | S |
| Ti181 | O185  | 2.029 | .     | S |
| Ti181 | O190  | 2.047 | .     | S |
| Ti182 | O186  | 2.032 | .     | S |
| Ti182 | O191  | 1.996 | .     | S |
| Ti182 | O189  | 1.988 | .     | S |
| Ti182 | O187  | 1.851 | .     | S |
| Ti182 | O357  | 1.895 | 1_565 | S |

|       |       |       |       |   |
|-------|-------|-------|-------|---|
| Ti183 | O187  | 1.982 | .     | S |
| Ti183 | O190  | 1.929 | .     | S |
| Ti183 | O185  | 1.952 | .     | S |
| Ti183 | O353  | 2.024 | 1_565 | S |
| Ti183 | O191  | 1.816 | .     | S |
| Ti184 | O188  | 2.082 | .     | S |
| Ti184 | O189  | 2.099 | .     | S |
| Ti184 | O186  | 1.930 | .     | S |
| Ti184 | O192  | 1.998 | .     | S |
| O186  | Ti352 | 1.968 | 1_565 | S |
| O190  | Ti349 | 2.030 | 1_565 | S |
| Ti193 | O197  | 1.900 | 1_455 | S |
| Ti193 | O202  | 2.103 | 1_455 | S |
| Ti193 | O344  | 1.919 | .     | S |
| Ti193 | O34   | 2.093 | 1_445 | S |
| Ti194 | O198  | 2.006 | .     | S |
| Ti194 | O203  | 2.019 | .     | S |
| Ti194 | O201  | 2.010 | .     | S |
| Ti194 | O211  | 1.924 | .     | S |
| Ti194 | O199  | 1.941 | .     | S |
| Ti194 | O225  | 1.925 | .     | S |
| Ti195 | O199  | 1.946 | .     | S |
| Ti195 | O202  | 1.938 | .     | S |
| Ti195 | O197  | 2.030 | .     | S |
| Ti195 | O221  | 2.085 | .     | S |
| Ti195 | O203  | 1.828 | .     | S |
| Ti196 | O200  | 2.027 | .     | S |
| Ti196 | O201  | 2.109 | .     | S |
| Ti196 | O216  | 1.874 | .     | S |
| Ti196 | O198  | 1.877 | .     | S |
| Ti196 | O30   | 1.986 | 1_545 | S |
| Ti196 | O204  | 1.973 | .     | S |
| O197  | Ti193 | 1.900 | 1_655 | S |
| O197  | Ti27  | 2.046 | 1_545 | S |
| O198  | Ti220 | 1.917 | .     | S |
| O200  | Ti253 | 1.827 | .     | S |
| O200  | Ti241 | 1.873 | .     | S |
| O201  | Ti26  | 1.966 | 1_545 | S |
| O202  | Ti193 | 2.103 | 1_655 | S |
| O202  | Ti217 | 2.117 | 1_655 | S |
| O203  | Ti207 | 1.942 | .     | S |
| O204  | Ti241 | 2.077 | .     | S |
| Ti205 | O209  | 2.121 | 1_455 | S |
| Ti205 | O360  | 2.006 | .     | S |
| Ti205 | O214  | 1.957 | .     | S |
| Ti205 | O344  | 1.946 | .     | S |
| Ti205 | O356  | 2.028 | .     | S |
| Ti205 | O46   | 1.903 | 1_545 | S |
| Ti206 | O210  | 1.988 | .     | S |
| Ti206 | O215  | 1.997 | .     | S |
| Ti206 | O213  | 2.057 | .     | S |

|       |       |       |       |   |
|-------|-------|-------|-------|---|
| Ti206 | O211  | 1.834 | .     | S |
| Ti206 | O237  | 2.107 | .     | S |
| Ti207 | O211  | 2.035 | .     | S |
| Ti207 | O214  | 2.108 | 1_655 | S |
| Ti207 | O209  | 1.970 | .     | S |
| Ti207 | O233  | 1.895 | .     | S |
| Ti207 | O215  | 1.970 | .     | S |
| Ti208 | O212  | 2.020 | .     | S |
| Ti208 | O213  | 1.928 | .     | S |
| Ti208 | O210  | 2.123 | .     | S |
| Ti208 | O42   | 2.097 | 1_545 | S |
| Ti208 | O216  | 1.893 | .     | S |
| O209  | Ti205 | 2.121 | 1_655 | S |
| O209  | Ti39  | 2.008 | 1_545 | S |
| O210  | Ti232 | 2.138 | .     | S |
| O212  | Ti253 | 1.909 | .     | S |
| O213  | Ti38  | 2.037 | 1_545 | S |
| O214  | Ti207 | 2.108 | 1_455 | S |
| O214  | Ti229 | 1.996 | .     | S |
| O216  | Ti253 | 1.934 | .     | S |
| Ti217 | O221  | 1.895 | 1_455 | S |
| Ti217 | O226  | 2.111 | 1_455 | S |
| Ti217 | O368  | 1.950 | .     | S |
| Ti217 | O202  | 2.117 | 1_455 | S |
| Ti218 | O222  | 2.097 | .     | S |
| Ti218 | O227  | 1.994 | .     | S |
| Ti218 | O225  | 1.884 | .     | S |
| Ti218 | O235  | 1.898 | .     | S |
| Ti218 | O223  | 1.956 | .     | S |
| Ti219 | O223  | 2.020 | .     | S |
| Ti219 | O226  | 1.978 | .     | S |
| Ti219 | O221  | 2.103 | .     | S |
| Ti219 | O227  | 1.804 | .     | S |
| Ti220 | O224  | 2.046 | .     | S |
| Ti220 | O225  | 2.002 | .     | S |
| Ti220 | O240  | 1.905 | .     | S |
| Ti220 | O222  | 2.033 | .     | S |
| Ti220 | O228  | 1.973 | .     | S |
| O221  | Ti217 | 1.895 | 1_655 | S |
| O224  | Ti277 | 1.883 | .     | S |
| O224  | Ti265 | 1.936 | .     | S |
| O226  | Ti217 | 2.111 | 1_655 | S |
| O226  | Ti1   | 2.093 | 1_655 | S |
| O227  | Ti231 | 1.901 | .     | S |
| O228  | Ti265 | 2.012 | .     | S |
| Ti229 | O233  | 2.033 | 1_455 | S |
| Ti229 | O384  | 2.003 | .     | S |
| Ti229 | O238  | 1.950 | .     | S |
| Ti229 | O368  | 1.952 | .     | S |
| Ti229 | O380  | 1.967 | .     | S |
| Ti230 | O234  | 1.939 | .     | S |

|       |       |       |       |   |
|-------|-------|-------|-------|---|
| Ti230 | O239  | 2.026 | .     | S |
| Ti230 | O237  | 2.096 | .     | S |
| Ti230 | O235  | 1.795 | .     | S |
| Ti231 | O235  | 1.996 | .     | S |
| Ti231 | O238  | 2.041 | 1_655 | S |
| Ti231 | O233  | 1.930 | .     | S |
| Ti231 | O239  | 1.957 | .     | S |
| Ti232 | O236  | 2.004 | .     | S |
| Ti232 | O237  | 1.908 | .     | S |
| Ti232 | O234  | 2.114 | .     | S |
| Ti232 | O240  | 1.941 | .     | S |
| O233  | Ti229 | 2.033 | 1_655 | S |
| O236  | Ti277 | 1.918 | .     | S |
| O238  | Ti231 | 2.041 | 1_455 | S |
| O240  | Ti277 | 1.972 | .     | S |
| Ti241 | O245  | 2.097 | .     | S |
| Ti241 | O250  | 2.034 | .     | S |
| Ti241 | O82   | 2.012 | 1_545 | S |
| Ti242 | O246  | 2.037 | .     | S |
| Ti242 | O251  | 2.062 | .     | S |
| Ti242 | O249  | 2.036 | .     | S |
| Ti242 | O259  | 1.978 | .     | S |
| Ti242 | O247  | 1.856 | .     | S |
| Ti242 | O273  | 1.913 | .     | S |
| Ti243 | O247  | 1.997 | .     | S |
| Ti243 | O250  | 1.964 | .     | S |
| Ti243 | O263  | 1.960 | .     | S |
| Ti243 | O245  | 2.064 | .     | S |
| Ti243 | O269  | 1.970 | .     | S |
| Ti243 | O251  | 1.885 | .     | S |
| Ti244 | O248  | 2.078 | .     | S |
| Ti244 | O249  | 2.099 | .     | S |
| Ti244 | O264  | 1.904 | .     | S |
| Ti244 | O246  | 1.930 | .     | S |
| Ti244 | O78   | 1.940 | 1_545 | S |
| Ti244 | O252  | 1.963 | .     | S |
| O245  | Ti75  | 2.060 | 1_545 | S |
| O246  | Ti268 | 1.984 | .     | S |
| O247  | Ti254 | 1.855 | .     | S |
| O248  | Ti289 | 1.991 | .     | S |
| O249  | Ti74  | 2.015 | 1_545 | S |
| O250  | Ti265 | 2.103 | .     | S |
| O251  | Ti255 | 1.927 | .     | S |
| O252  | Ti289 | 1.965 | .     | S |
| O252  | Ti256 | 1.890 | .     | S |
| Ti253 | O257  | 1.903 | .     | S |
| Ti253 | O262  | 1.966 | .     | S |
| Ti253 | O94   | 2.048 | 1_545 | S |
| Ti254 | O258  | 2.001 | .     | S |
| Ti254 | O263  | 1.985 | .     | S |
| Ti254 | O261  | 2.056 | .     | S |

|       |       |       |       |   |
|-------|-------|-------|-------|---|
| Ti254 | O285  | 2.125 | .     | S |
| Ti255 | O259  | 2.011 | .     | S |
| Ti255 | O262  | 2.065 | .     | S |
| Ti255 | O257  | 2.054 | .     | S |
| Ti255 | O281  | 2.099 | .     | S |
| Ti256 | O260  | 2.029 | .     | S |
| Ti256 | O261  | 1.920 | .     | S |
| Ti256 | O258  | 2.112 | .     | S |
| Ti256 | O90   | 2.104 | 1_545 | S |
| O257  | Ti87  | 2.003 | 1_545 | S |
| O258  | Ti280 | 2.118 | .     | S |
| O260  | Ti289 | 1.933 | .     | S |
| O260  | Ti301 | 1.971 | .     | S |
| O261  | Ti86  | 2.035 | 1_545 | S |
| O262  | Ti277 | 1.971 | .     | S |
| Ti265 | O269  | 2.058 | .     | S |
| Ti265 | O274  | 2.063 | .     | S |
| Ti266 | O270  | 2.087 | .     | S |
| Ti266 | O275  | 2.040 | .     | S |
| Ti266 | O273  | 1.890 | .     | S |
| Ti266 | O283  | 1.979 | .     | S |
| Ti266 | O271  | 1.818 | .     | S |
| Ti267 | O271  | 1.940 | .     | S |
| Ti267 | O274  | 1.915 | .     | S |
| Ti267 | O287  | 1.953 | .     | S |
| Ti267 | O269  | 1.958 | .     | S |
| Ti267 | O275  | 1.828 | .     | S |
| Ti268 | O272  | 2.106 | .     | S |
| Ti268 | O273  | 2.028 | .     | S |
| Ti268 | O288  | 1.917 | .     | S |
| Ti268 | O270  | 2.002 | .     | S |
| Ti268 | O276  | 1.981 | .     | S |
| O271  | Ti278 | 1.809 | .     | S |
| O272  | Ti313 | 1.977 | .     | S |
| O275  | Ti279 | 1.858 | .     | S |
| O276  | Ti313 | 2.019 | .     | S |
| O276  | Ti280 | 1.933 | .     | S |
| Ti277 | O281  | 1.950 | .     | S |
| Ti277 | O286  | 2.049 | .     | S |
| Ti278 | O282  | 1.942 | .     | S |
| Ti278 | O287  | 1.998 | .     | S |
| Ti278 | O285  | 2.111 | .     | S |
| Ti279 | O283  | 2.047 | .     | S |
| Ti279 | O286  | 2.087 | .     | S |
| Ti279 | O281  | 2.029 | .     | S |
| Ti280 | O284  | 1.966 | .     | S |
| Ti280 | O285  | 1.890 | .     | S |
| Ti280 | O282  | 2.108 | .     | S |
| O284  | Ti313 | 1.911 | .     | S |
| O284  | Ti325 | 1.890 | .     | S |
| Ti289 | O293  | 2.012 | .     | S |

|       |       |       |       |   |
|-------|-------|-------|-------|---|
| Ti289 | O298  | 1.936 | .     | S |
| Ti289 | O130  | 1.990 | 1_545 | S |
| Ti290 | O294  | 1.993 | .     | S |
| Ti290 | O299  | 2.017 | .     | S |
| Ti290 | O297  | 2.114 | .     | S |
| Ti290 | O295  | 1.836 | .     | S |
| Ti290 | O321  | 2.058 | .     | S |
| Ti291 | O295  | 2.022 | .     | S |
| Ti291 | O298  | 2.033 | .     | S |
| Ti291 | O311  | 1.908 | .     | S |
| Ti291 | O293  | 1.947 | .     | S |
| Ti291 | O317  | 2.023 | .     | S |
| Ti291 | O299  | 1.956 | .     | S |
| Ti292 | O296  | 1.997 | .     | S |
| Ti292 | O297  | 1.905 | .     | S |
| Ti292 | O294  | 2.137 | .     | S |
| Ti292 | O126  | 2.111 | 1_545 | S |
| Ti292 | O300  | 1.939 | .     | S |
| O293  | Ti123 | 1.891 | 1_545 | S |
| O294  | Ti316 | 2.120 | .     | S |
| O295  | Ti302 | 1.918 | .     | S |
| O296  | Ti337 | 1.914 | .     | S |
| O297  | Ti122 | 2.091 | 1_545 | S |
| O298  | Ti313 | 1.901 | .     | S |
| O300  | Ti337 | 1.970 | .     | S |
| O300  | Ti304 | 1.907 | .     | S |
| Ti301 | O305  | 1.993 | .     | S |
| Ti301 | O310  | 2.077 | .     | S |
| Ti301 | O142  | 2.050 | 1_545 | S |
| Ti302 | O306  | 1.996 | .     | S |
| Ti302 | O311  | 2.008 | .     | S |
| Ti302 | O309  | 1.908 | .     | S |
| Ti302 | O307  | 1.929 | .     | S |
| Ti302 | O333  | 2.011 | .     | S |
| Ti303 | O307  | 1.940 | .     | S |
| Ti303 | O310  | 1.964 | .     | S |
| Ti303 | O305  | 2.066 | .     | S |
| Ti303 | O329  | 2.014 | .     | S |
| Ti303 | O311  | 1.837 | .     | S |
| Ti304 | O308  | 2.042 | .     | S |
| Ti304 | O309  | 2.011 | .     | S |
| Ti304 | O306  | 1.925 | .     | S |
| Ti304 | O138  | 2.040 | 1_545 | S |
| Ti304 | O312  | 1.973 | .     | S |
| O305  | Ti135 | 2.061 | 1_545 | S |
| O306  | Ti328 | 1.880 | .     | S |
| O308  | Ti337 | 1.869 | .     | S |
| O308  | Ti349 | 1.943 | .     | S |
| O309  | Ti134 | 1.905 | 1_545 | S |
| O310  | Ti325 | 2.044 | .     | S |
| O312  | Ti349 | 2.026 | .     | S |

|       |       |       |       |   |
|-------|-------|-------|-------|---|
| Ti313 | O317  | 2.120 | .     | S |
| Ti313 | O322  | 1.956 | .     | S |
| Ti314 | O318  | 1.926 | .     | S |
| Ti314 | O323  | 1.988 | .     | S |
| Ti314 | O321  | 2.029 | .     | S |
| Ti314 | O319  | 1.799 | .     | S |
| Ti315 | O319  | 1.997 | .     | S |
| Ti315 | O322  | 2.096 | .     | S |
| Ti315 | O335  | 1.992 | .     | S |
| Ti315 | O317  | 1.977 | .     | S |
| Ti315 | O323  | 1.962 | .     | S |
| Ti316 | O320  | 2.023 | .     | S |
| Ti316 | O321  | 1.925 | .     | S |
| Ti316 | O318  | 2.102 | .     | S |
| Ti316 | O324  | 1.893 | .     | S |
| O319  | Ti326 | 1.872 | .     | S |
| O320  | Ti361 | 1.912 | .     | S |
| O324  | Ti361 | 1.941 | .     | S |
| O324  | Ti328 | 1.878 | .     | S |
| Ti325 | O329  | 1.886 | .     | S |
| Ti325 | O334  | 2.037 | .     | S |
| Ti326 | O330  | 2.096 | .     | S |
| Ti326 | O335  | 2.046 | .     | S |
| Ti326 | O333  | 1.977 | .     | S |
| Ti326 | O331  | 1.930 | .     | S |
| Ti327 | O331  | 1.991 | .     | S |
| Ti327 | O334  | 1.969 | .     | S |
| Ti327 | O329  | 2.030 | .     | S |
| Ti327 | O335  | 1.852 | .     | S |
| Ti328 | O332  | 2.018 | .     | S |
| Ti328 | O333  | 2.111 | .     | S |
| Ti328 | O330  | 1.983 | .     | S |
| Ti328 | O336  | 1.955 | .     | S |
| O332  | Ti361 | 1.850 | .     | S |
| O332  | Ti373 | 1.876 | .     | S |
| O336  | Ti373 | 2.062 | .     | S |
| Ti337 | O341  | 1.914 | .     | S |
| Ti337 | O346  | 1.957 | .     | S |
| Ti337 | O178  | 2.033 | 1_545 | S |
| Ti338 | O342  | 1.946 | .     | S |
| Ti338 | O347  | 1.997 | .     | S |
| Ti338 | O345  | 2.072 | .     | S |
| Ti338 | O355  | 1.808 | .     | S |
| Ti338 | O369  | 2.067 | .     | S |
| Ti339 | O343  | 2.044 | .     | S |
| Ti339 | O346  | 2.072 | .     | S |
| Ti339 | O359  | 1.916 | .     | S |
| Ti339 | O341  | 2.085 | .     | S |
| Ti339 | O365  | 2.085 | .     | S |
| Ti340 | O344  | 1.984 | .     | S |
| Ti340 | O345  | 1.936 | .     | S |



|       |       |       |       |   |
|-------|-------|-------|-------|---|
| Ti340 | O360  | 1.910 | .     | S |
| Ti340 | O342  | 2.111 | .     | S |
| Ti340 | O174  | 2.121 | 1_545 | S |
| O341  | Ti171 | 1.996 | 1_545 | S |
| O342  | Ti364 | 2.102 | .     | S |
| O343  | Ti350 | 1.998 | .     | S |
| O345  | Ti170 | 2.089 | 1_545 | S |
| O346  | Ti361 | 1.962 | .     | S |
| O347  | Ti351 | 1.962 | .     | S |
| O348  | Ti352 | 1.904 | .     | S |
| Ti349 | O353  | 2.119 | .     | S |
| Ti349 | O358  | 2.060 | .     | S |
| Ti349 | O190  | 2.030 | 1_545 | S |
| Ti350 | O354  | 2.088 | .     | S |
| Ti350 | O359  | 2.056 | .     | S |
| Ti350 | O357  | 1.889 | .     | S |
| Ti350 | O355  | 1.801 | .     | S |
| Ti350 | O381  | 1.979 | .     | S |
| Ti351 | O355  | 1.911 | .     | S |
| Ti351 | O358  | 1.954 | .     | S |
| Ti351 | O353  | 2.013 | .     | S |
| Ti351 | O377  | 1.952 | .     | S |
| Ti351 | O359  | 1.901 | .     | S |
| Ti352 | O356  | 2.090 | .     | S |
| Ti352 | O357  | 2.006 | .     | S |
| Ti352 | O354  | 1.972 | .     | S |
| Ti352 | O186  | 1.968 | 1_545 | S |
| Ti352 | O360  | 1.933 | .     | S |
| O353  | Ti183 | 2.024 | 1_545 | S |
| O354  | Ti376 | 1.951 | .     | S |
| O357  | Ti182 | 1.895 | 1_545 | S |
| O358  | Ti373 | 2.070 | .     | S |
| Ti361 | O365  | 1.944 | .     | S |
| Ti361 | O370  | 2.047 | .     | S |
| Ti362 | O366  | 2.000 | .     | S |
| Ti362 | O371  | 1.996 | .     | S |
| Ti362 | O369  | 2.082 | .     | S |
| Ti362 | O379  | 1.835 | .     | S |
| Ti363 | O367  | 2.033 | .     | S |
| Ti363 | O370  | 2.079 | .     | S |
| Ti363 | O383  | 1.855 | .     | S |
| Ti363 | O365  | 2.012 | .     | S |
| Ti364 | O368  | 1.998 | .     | S |
| Ti364 | O369  | 1.886 | .     | S |
| Ti364 | O384  | 1.921 | .     | S |
| Ti364 | O366  | 2.111 | .     | S |
| O367  | Ti374 | 1.951 | .     | S |
| O371  | Ti375 | 1.956 | .     | S |
| O372  | Ti376 | 1.913 | .     | S |
| Ti373 | O377  | 2.026 | .     | S |
| Ti373 | O382  | 2.045 | .     | S |

|       |       |       |       |   |
|-------|-------|-------|-------|---|
| Ti374 | O378  | 2.031 | .     | S |
| Ti374 | O383  | 1.995 | .     | S |
| Ti374 | O381  | 1.988 | .     | S |
| Ti374 | O379  | 1.850 | .     | S |
| Ti375 | O379  | 1.982 | .     | S |
| Ti375 | O382  | 1.929 | .     | S |
| Ti375 | O377  | 1.952 | .     | S |
| Ti375 | O383  | 1.817 | .     | S |
| Ti376 | O380  | 2.081 | .     | S |
| Ti376 | O381  | 2.098 | .     | S |
| Ti376 | O378  | 1.931 | .     | S |
| Ti376 | O384  | 1.998 | .     | S |
| C385  | C386  | 1.214 | .     | T |
| C385  | C406  | 1.358 | .     | A |
| C386  | C387  | 1.326 | .     | D |
| C387  | C388  | 1.211 | .     | T |
| C388  | C389  | 1.327 | .     | D |
| C389  | C390  | 1.215 | .     | T |
| C390  | C391  | 1.355 | .     | A |
| C391  | C392  | 1.322 | .     | D |
| C391  | S393  | 1.794 | .     | S |
| C392  | C394  | 1.379 | .     | A |
| C392  | H395  | 1.083 | .     | S |
| S393  | C396  | 1.811 | .     | S |
| C394  | C396  | 1.333 | .     | D |
| C394  | H397  | 1.083 | .     | S |
| C396  | C398  | 1.398 | .     | A |
| C398  | H399  | 1.084 | .     | S |
| C398  | C400  | 1.361 | .     | D |
| C400  | C401  | 1.369 | .     | A |
| C400  | C402  | 1.474 | .     | S |
| C401  | N405  | 1.165 | .     | T |
| C402  | O403  | 1.285 | .     | A |
| C402  | O404  | 1.230 | .     | D |
| O403  | Ti111 | 1.891 | 1_445 | S |
| O404  | Ti135 | 1.893 | 1_445 | S |
| C406  | C407  | 1.324 | .     | D |
| C406  | S408  | 1.799 | .     | S |
| C407  | C409  | 1.379 | .     | A |
| C407  | H410  | 1.083 | .     | S |
| S408  | C411  | 1.806 | .     | S |
| C409  | C411  | 1.328 | .     | D |
| C409  | H412  | 1.082 | .     | S |
| C411  | N421  | 1.356 | .     | A |
| H413  | N421  | 1.043 | .     | S |
| C414  | C415  | 1.321 | .     | D |
| C414  | N421  | 1.427 | .     | S |
| C414  | N422  | 1.413 | .     | S |
| C415  | C416  | 1.385 | .     | A |
| C415  | H417  | 1.080 | .     | S |
| C416  | C418  | 1.329 | .     | D |

C416 H419 1.082 . S  
C418 H420 1.084 . S  
C418 N422 1.345 . A  
N422 H423 1.043 . S

data\_TiO2@PY4PO3

\_audit\_creation\_method 'Materials Studio'

\_symmetry\_space\_group\_name\_H-M 'P1'

\_symmetry\_Int\_Tables\_number 1

\_symmetry\_cell\_setting triclinic

loop\_

\_symmetry\_equiv\_pos\_as\_xyz

x,y,z

\_cell\_length\_a 38.6882

\_cell\_length\_b 15.1040

\_cell\_length\_c 47.5200

\_cell\_angle\_alpha 90.0000

\_cell\_angle\_beta 90.0000

\_cell\_angle\_gamma 90.0000

loop\_

\_atom\_site\_label

\_atom\_site\_type\_symbol

\_atom\_site\_fract\_x

\_atom\_site\_fract\_y

\_atom\_site\_fract\_z

\_atom\_site\_U\_iso\_or\_equiv

\_atom\_site\_adp\_type

\_atom\_site\_occupancy

|      |    |          |         |         |         |      |      |
|------|----|----------|---------|---------|---------|------|------|
| Ti1  | Ti | -0.00693 | 0.50280 | 0.83872 | 0.00000 | Uiso | 1.00 |
| Ti2  | Ti | 0.89087  | 0.62857 | 0.88919 | 0.00000 | Uiso | 1.00 |
| Ti3  | Ti | 0.93662  | 0.62189 | 0.84637 | 0.00000 | Uiso | 1.00 |
| Ti4  | Ti | 0.83359  | 0.50400 | 0.90225 | 0.00000 | Uiso | 1.00 |
| O5   | O  | 0.95198  | 0.50143 | 0.86061 | 0.00000 | Uiso | 1.00 |
| O6   | O  | 0.83913  | 0.62270 | 0.89149 | 0.00000 | Uiso | 1.00 |
| O7   | O  | 0.88669  | 0.60874 | 0.84898 | 0.00000 | Uiso | 1.00 |
| O8   | O  | 0.78410  | 0.53581 | 0.91198 | 0.00000 | Uiso | 1.00 |
| O9   | O  | 0.88783  | 0.49873 | 0.89814 | 0.00000 | Uiso | 1.00 |
| O10  | O  | 0.97719  | 0.62576 | 0.82250 | 0.00000 | Uiso | 1.00 |
| O11  | O  | 0.94165  | 0.65327 | 0.88330 | 0.00000 | Uiso | 1.00 |
| O12  | O  | 0.80878  | 0.47929 | 0.86683 | 0.00000 | Uiso | 1.00 |
| Ti13 | Ti | 0.02089  | 0.49637 | 0.90684 | 0.00000 | Uiso | 1.00 |
| Ti14 | Ti | 0.91301  | 0.62057 | 0.96185 | 0.00000 | Uiso | 1.00 |
| Ti15 | Ti | 0.96444  | 0.62842 | 0.91885 | 0.00000 | Uiso | 1.00 |
| Ti16 | Ti | 0.85606  | 0.49885 | 0.97562 | 0.00000 | Uiso | 1.00 |
| O17  | O  | 0.96626  | 0.50087 | 0.91026 | 0.00000 | Uiso | 1.00 |
| O18  | O  | 0.87409  | 0.62463 | 0.98913 | 0.00000 | Uiso | 1.00 |
| O19  | O  | 0.91315  | 0.65229 | 0.92459 | 0.00000 | Uiso | 1.00 |
| O20  | O  | 0.80614  | 0.47300 | 0.98507 | 0.00000 | Uiso | 1.00 |
| O21  | O  | 0.89447  | 0.49869 | 0.94978 | 0.00000 | Uiso | 1.00 |
| O22  | O  | 0.01872  | 0.62300 | 0.91542 | 0.00000 | Uiso | 1.00 |
| O23  | O  | 0.96433  | 0.60766 | 0.95977 | 0.00000 | Uiso | 1.00 |

|      |    |          |         |         |         |      |      |
|------|----|----------|---------|---------|---------|------|------|
| O24  | O  | 0.83618  | 0.53099 | 0.94068 | 0.00000 | Uiso | 1.00 |
| Ti25 | Ti | -0.00850 | 0.75017 | 0.83938 | 0.00000 | Uiso | 1.00 |
| Ti26 | Ti | 0.88880  | 0.86973 | 0.89266 | 0.00000 | Uiso | 1.00 |
| Ti27 | Ti | 0.93450  | 0.88172 | 0.84635 | 0.00000 | Uiso | 1.00 |
| Ti28 | Ti | 0.82940  | 0.74485 | 0.89910 | 0.00000 | Uiso | 1.00 |
| O29  | O  | 0.94808  | 0.75184 | 0.85783 | 0.00000 | Uiso | 1.00 |
| O30  | O  | 0.83815  | 0.87436 | 0.90834 | 0.00000 | Uiso | 1.00 |
| O31  | O  | 0.88305  | 0.89356 | 0.85248 | 0.00000 | Uiso | 1.00 |
| O32  | O  | 0.77965  | 0.71859 | 0.91107 | 0.00000 | Uiso | 1.00 |
| O33  | O  | 0.87792  | 0.75082 | 0.88460 | 0.00000 | Uiso | 1.00 |
| O34  | O  | 0.97804  | 0.87732 | 0.82456 | 0.00000 | Uiso | 1.00 |
| O35  | O  | 0.93778  | 0.84457 | 0.88232 | 0.00000 | Uiso | 1.00 |
| O36  | O  | 0.80832  | 0.76222 | 0.86169 | 0.00000 | Uiso | 1.00 |
| Ti37 | Ti | 0.02521  | 0.75267 | 0.90924 | 0.00000 | Uiso | 1.00 |
| Ti38 | Ti | 0.91557  | 0.88115 | 0.96192 | 0.00000 | Uiso | 1.00 |
| Ti39 | Ti | 0.96227  | 0.86958 | 0.91606 | 0.00000 | Uiso | 1.00 |
| Ti40 | Ti | 0.85713  | 0.75110 | 0.97441 | 0.00000 | Uiso | 1.00 |
| O41  | O  | 0.97590  | 0.74928 | 0.92402 | 0.00000 | Uiso | 1.00 |
| O42  | O  | 0.87643  | 0.87560 | 0.98734 | 0.00000 | Uiso | 1.00 |
| O43  | O  | 0.91329  | 0.84298 | 0.92620 | 0.00000 | Uiso | 1.00 |
| O44  | O  | 0.80802  | 0.77831 | 0.98470 | 0.00000 | Uiso | 1.00 |
| O45  | O  | 0.89879  | 0.75225 | 0.95292 | 0.00000 | Uiso | 1.00 |
| O46  | O  | 0.01156  | 0.87411 | 0.90083 | 0.00000 | Uiso | 1.00 |
| O47  | O  | 0.96728  | 0.89304 | 0.95636 | 0.00000 | Uiso | 1.00 |
| O48  | O  | 0.83656  | 0.72371 | 0.93818 | 0.00000 | Uiso | 1.00 |
| Ti49 | Ti | 0.75845  | 0.49744 | 0.88087 | 0.00000 | Uiso | 1.00 |
| Ti50 | Ti | 0.65717  | 0.62761 | 0.92692 | 0.00000 | Uiso | 1.00 |
| Ti51 | Ti | 0.69812  | 0.62363 | 0.87670 | 0.00000 | Uiso | 1.00 |
| Ti52 | Ti | 0.59905  | 0.49911 | 0.93157 | 0.00000 | Uiso | 1.00 |
| O53  | O  | 0.70557  | 0.49536 | 0.89046 | 0.00000 | Uiso | 1.00 |
| O54  | O  | 0.60768  | 0.62120 | 0.94128 | 0.00000 | Uiso | 1.00 |
| O55  | O  | 0.65027  | 0.65379 | 0.88919 | 0.00000 | Uiso | 1.00 |
| O56  | O  | 0.54882  | 0.50839 | 0.94654 | 0.00000 | Uiso | 1.00 |
| O57  | O  | 0.64960  | 0.49908 | 0.91557 | 0.00000 | Uiso | 1.00 |
| O58  | O  | 0.74596  | 0.61563 | 0.86301 | 0.00000 | Uiso | 1.00 |
| O59  | O  | 0.70715  | 0.65417 | 0.91446 | 0.00000 | Uiso | 1.00 |
| O60  | O  | 0.57080  | 0.52616 | 0.89835 | 0.00000 | Uiso | 1.00 |
| Ti61 | Ti | 0.78838  | 0.50377 | 0.94888 | 0.00000 | Uiso | 1.00 |
| Ti62 | Ti | 0.62937  | 0.61449 | 0.85630 | 0.00000 | Uiso | 1.00 |
| Ti63 | Ti | 0.72769  | 0.62668 | 0.95036 | 0.00000 | Uiso | 1.00 |
| Ti64 | Ti | 0.56954  | 0.49360 | 0.86009 | 0.00000 | Uiso | 1.00 |
| O65  | O  | 0.74047  | 0.49672 | 0.95769 | 0.00000 | Uiso | 1.00 |
| O66  | O  | 0.58039  | 0.61934 | 0.84248 | 0.00000 | Uiso | 1.00 |
| O67  | O  | 0.67903  | 0.60840 | 0.96404 | 0.00000 | Uiso | 1.00 |
| O68  | O  | 0.51993  | 0.46612 | 0.87091 | 0.00000 | Uiso | 1.00 |
| O69  | O  | 0.61635  | 0.49374 | 0.87339 | 0.00000 | Uiso | 1.00 |
| O70  | O  | 0.77951  | 0.62635 | 0.96077 | 0.00000 | Uiso | 1.00 |
| O71  | O  | 0.67632  | 0.59442 | 0.84058 | 0.00000 | Uiso | 1.00 |
| O72  | O  | 0.61954  | 0.47109 | 0.96689 | 0.00000 | Uiso | 1.00 |
| Ti73 | Ti | 0.75931  | 0.74540 | 0.87483 | 0.00000 | Uiso | 1.00 |
| Ti74 | Ti | 0.65412  | 0.86840 | 0.92308 | 0.00000 | Uiso | 1.00 |

|       |    |         |         |         |         |      |      |
|-------|----|---------|---------|---------|---------|------|------|
| Ti75  | Ti | 0.69870 | 0.86766 | 0.87631 | 0.00000 | Uiso | 1.00 |
| Ti76  | Ti | 0.59499 | 0.74742 | 0.93627 | 0.00000 | Uiso | 1.00 |
| O77   | O  | 0.70767 | 0.74575 | 0.86438 | 0.00000 | Uiso | 1.00 |
| O78   | O  | 0.60021 | 0.87320 | 0.92362 | 0.00000 | Uiso | 1.00 |
| O79   | O  | 0.65177 | 0.83520 | 0.88636 | 0.00000 | Uiso | 1.00 |
| O80   | O  | 0.54194 | 0.73532 | 0.94517 | 0.00000 | Uiso | 1.00 |
| O81   | O  | 0.64732 | 0.74955 | 0.93425 | 0.00000 | Uiso | 1.00 |
| O82   | O  | 0.74666 | 0.87557 | 0.86662 | 0.00000 | Uiso | 1.00 |
| O83   | O  | 0.70375 | 0.83528 | 0.91316 | 0.00000 | Uiso | 1.00 |
| O84   | O  | 0.57085 | 0.72007 | 0.90062 | 0.00000 | Uiso | 1.00 |
| Ti85  | Ti | 0.78831 | 0.74924 | 0.94884 | 0.00000 | Uiso | 1.00 |
| Ti86  | Ti | 0.63110 | 0.87864 | 0.85511 | 0.00000 | Uiso | 1.00 |
| Ti87  | Ti | 0.72915 | 0.87476 | 0.94390 | 0.00000 | Uiso | 1.00 |
| Ti88  | Ti | 0.57244 | 0.74596 | 0.86087 | 0.00000 | Uiso | 1.00 |
| O89   | O  | 0.74062 | 0.75663 | 0.96194 | 0.00000 | Uiso | 1.00 |
| O90   | O  | 0.58307 | 0.87138 | 0.84323 | 0.00000 | Uiso | 1.00 |
| O91   | O  | 0.67981 | 0.89462 | 0.95811 | 0.00000 | Uiso | 1.00 |
| O92   | O  | 0.52471 | 0.78111 | 0.87044 | 0.00000 | Uiso | 1.00 |
| O93   | O  | 0.62046 | 0.74807 | 0.86845 | 0.00000 | Uiso | 1.00 |
| O94   | O  | 0.78196 | 0.87655 | 0.93490 | 0.00000 | Uiso | 1.00 |
| O95   | O  | 0.67862 | 0.89902 | 0.83992 | 0.00000 | Uiso | 1.00 |
| O96   | O  | 0.60776 | 0.77572 | 0.97419 | 0.00000 | Uiso | 1.00 |
| Ti97  | Ti | 0.52311 | 0.50164 | 0.91027 | 0.00000 | Uiso | 1.00 |
| Ti98  | Ti | 0.41363 | 0.63181 | 0.96103 | 0.00000 | Uiso | 1.00 |
| Ti99  | Ti | 0.46091 | 0.61925 | 0.91515 | 0.00000 | Uiso | 1.00 |
| Ti100 | Ti | 0.35720 | 0.50089 | 0.97422 | 0.00000 | Uiso | 1.00 |
| O101  | O  | 0.47443 | 0.49916 | 0.92522 | 0.00000 | Uiso | 1.00 |
| O102  | O  | 0.37485 | 0.62709 | 0.98865 | 0.00000 | Uiso | 1.00 |
| O103  | O  | 0.41095 | 0.59710 | 0.92428 | 0.00000 | Uiso | 1.00 |
| O104  | O  | 0.30822 | 0.47476 | 0.98469 | 0.00000 | Uiso | 1.00 |
| O105  | O  | 0.39877 | 0.49962 | 0.95262 | 0.00000 | Uiso | 1.00 |
| O106  | O  | 0.51049 | 0.62294 | 0.90125 | 0.00000 | Uiso | 1.00 |
| O107  | O  | 0.46517 | 0.64615 | 0.95531 | 0.00000 | Uiso | 1.00 |
| O108  | O  | 0.33690 | 0.52699 | 0.93791 | 0.00000 | Uiso | 1.00 |
| Ti109 | Ti | 0.48927 | 0.48936 | 0.83871 | 0.00000 | Uiso | 1.00 |
| Ti110 | Ti | 0.39099 | 0.61536 | 0.88821 | 0.00000 | Uiso | 1.00 |
| Ti111 | Ti | 0.43569 | 0.62408 | 0.84196 | 0.00000 | Uiso | 1.00 |
| Ti112 | Ti | 0.32954 | 0.50132 | 0.89927 | 0.00000 | Uiso | 1.00 |
| O113  | O  | 0.43867 | 0.49173 | 0.83410 | 0.00000 | Uiso | 1.00 |
| O114  | O  | 0.33938 | 0.62366 | 0.89128 | 0.00000 | Uiso | 1.00 |
| O115  | O  | 0.38576 | 0.62436 | 0.84957 | 0.00000 | Uiso | 1.00 |
| O116  | O  | 0.27982 | 0.52774 | 0.91083 | 0.00000 | Uiso | 1.00 |
| O117  | O  | 0.37810 | 0.49443 | 0.88506 | 0.00000 | Uiso | 1.00 |
| O118  | O  | 0.48489 | 0.62302 | 0.83264 | 0.00000 | Uiso | 1.00 |
| O119  | O  | 0.44099 | 0.58850 | 0.87970 | 0.00000 | Uiso | 1.00 |
| O120  | O  | 0.30776 | 0.48019 | 0.86235 | 0.00000 | Uiso | 1.00 |
| Ti121 | Ti | 0.52045 | 0.74512 | 0.90764 | 0.00000 | Uiso | 1.00 |
| Ti122 | Ti | 0.41429 | 0.86978 | 0.96088 | 0.00000 | Uiso | 1.00 |
| Ti123 | Ti | 0.46450 | 0.87747 | 0.91743 | 0.00000 | Uiso | 1.00 |
| Ti124 | Ti | 0.35582 | 0.75125 | 0.97502 | 0.00000 | Uiso | 1.00 |
| O125  | O  | 0.46583 | 0.75021 | 0.90766 | 0.00000 | Uiso | 1.00 |

|       |    |         |         |         |         |      |      |
|-------|----|---------|---------|---------|---------|------|------|
| O126  | O  | 0.37584 | 0.87495 | 0.98663 | 0.00000 | Uiso | 1.00 |
| O127  | O  | 0.41508 | 0.90331 | 0.92459 | 0.00000 | Uiso | 1.00 |
| O128  | O  | 0.30565 | 0.77412 | 0.98448 | 0.00000 | Uiso | 1.00 |
| O129  | O  | 0.39368 | 0.75219 | 0.94865 | 0.00000 | Uiso | 1.00 |
| O130  | O  | 0.51844 | 0.87226 | 0.91503 | 0.00000 | Uiso | 1.00 |
| O131  | O  | 0.46525 | 0.85363 | 0.95801 | 0.00000 | Uiso | 1.00 |
| O132  | O  | 0.33630 | 0.71748 | 0.94013 | 0.00000 | Uiso | 1.00 |
| Ti133 | Ti | 0.48946 | 0.74948 | 0.84579 | 0.00000 | Uiso | 1.00 |
| Ti134 | Ti | 0.39110 | 0.87912 | 0.89164 | 0.00000 | Uiso | 1.00 |
| Ti135 | Ti | 0.43284 | 0.86818 | 0.84202 | 0.00000 | Uiso | 1.00 |
| Ti136 | Ti | 0.33502 | 0.74400 | 0.90141 | 0.00000 | Uiso | 1.00 |
| O137  | O  | 0.44108 | 0.74640 | 0.85610 | 0.00000 | Uiso | 1.00 |
| O138  | O  | 0.34049 | 0.87372 | 0.90792 | 0.00000 | Uiso | 1.00 |
| O139  | O  | 0.38251 | 0.86481 | 0.85322 | 0.00000 | Uiso | 1.00 |
| O140  | O  | 0.28510 | 0.71614 | 0.91033 | 0.00000 | Uiso | 1.00 |
| O141  | O  | 0.38924 | 0.74751 | 0.89594 | 0.00000 | Uiso | 1.00 |
| O142  | O  | 0.48023 | 0.86938 | 0.82837 | 0.00000 | Uiso | 1.00 |
| O143  | O  | 0.44189 | 0.90106 | 0.88026 | 0.00000 | Uiso | 1.00 |
| O144  | O  | 0.31363 | 0.76844 | 0.86499 | 0.00000 | Uiso | 1.00 |
| Ti145 | Ti | 0.28886 | 0.50060 | 0.94853 | 0.00000 | Uiso | 1.00 |
| Ti146 | Ti | 0.13452 | 0.62384 | 0.85178 | 0.00000 | Uiso | 1.00 |
| Ti147 | Ti | 0.22642 | 0.61962 | 0.94976 | 0.00000 | Uiso | 1.00 |
| Ti148 | Ti | 0.07536 | 0.49761 | 0.85922 | 0.00000 | Uiso | 1.00 |
| O149  | O  | 0.24202 | 0.49254 | 0.96117 | 0.00000 | Uiso | 1.00 |
| O150  | O  | 0.08572 | 0.62336 | 0.84179 | 0.00000 | Uiso | 1.00 |
| O151  | O  | 0.17563 | 0.60804 | 0.96105 | 0.00000 | Uiso | 1.00 |
| O152  | O  | 0.02652 | 0.52817 | 0.86743 | 0.00000 | Uiso | 1.00 |
| O153  | O  | 0.12440 | 0.49828 | 0.86730 | 0.00000 | Uiso | 1.00 |
| O154  | O  | 0.27866 | 0.62243 | 0.95951 | 0.00000 | Uiso | 1.00 |
| O155  | O  | 0.18194 | 0.64773 | 0.83706 | 0.00000 | Uiso | 1.00 |
| O156  | O  | 0.11629 | 0.52538 | 0.96777 | 0.00000 | Uiso | 1.00 |
| Ti157 | Ti | 0.25827 | 0.49917 | 0.87502 | 0.00000 | Uiso | 1.00 |
| Ti158 | Ti | 0.15595 | 0.61985 | 0.92235 | 0.00000 | Uiso | 1.00 |
| Ti159 | Ti | 0.20160 | 0.63018 | 0.87471 | 0.00000 | Uiso | 1.00 |
| Ti160 | Ti | 0.09719 | 0.49871 | 0.93183 | 0.00000 | Uiso | 1.00 |
| O161  | O  | 0.20439 | 0.49944 | 0.86697 | 0.00000 | Uiso | 1.00 |
| O162  | O  | 0.10204 | 0.62598 | 0.92340 | 0.00000 | Uiso | 1.00 |
| O163  | O  | 0.15443 | 0.64650 | 0.88543 | 0.00000 | Uiso | 1.00 |
| O164  | O  | 0.04555 | 0.49017 | 0.94444 | 0.00000 | Uiso | 1.00 |
| O165  | O  | 0.14549 | 0.49902 | 0.91645 | 0.00000 | Uiso | 1.00 |
| O166  | O  | 0.24926 | 0.62629 | 0.86119 | 0.00000 | Uiso | 1.00 |
| O167  | O  | 0.20725 | 0.59896 | 0.91318 | 0.00000 | Uiso | 1.00 |
| O168  | O  | 0.07077 | 0.47167 | 0.89838 | 0.00000 | Uiso | 1.00 |
| Ti169 | Ti | 0.28810 | 0.74506 | 0.94804 | 0.00000 | Uiso | 1.00 |
| Ti170 | Ti | 0.13286 | 0.87036 | 0.85195 | 0.00000 | Uiso | 1.00 |
| Ti171 | Ti | 0.23049 | 0.87570 | 0.94343 | 0.00000 | Uiso | 1.00 |
| Ti172 | Ti | 0.07352 | 0.74737 | 0.85922 | 0.00000 | Uiso | 1.00 |
| O173  | O  | 0.23909 | 0.75173 | 0.95703 | 0.00000 | Uiso | 1.00 |
| O174  | O  | 0.08311 | 0.87164 | 0.84048 | 0.00000 | Uiso | 1.00 |
| O175  | O  | 0.18262 | 0.89099 | 0.96048 | 0.00000 | Uiso | 1.00 |
| O176  | O  | 0.02431 | 0.72262 | 0.86929 | 0.00000 | Uiso | 1.00 |

|       |    |          |          |         |         |      |      |
|-------|----|----------|----------|---------|---------|------|------|
| O177  | O  | 0.12102  | 0.74585  | 0.86813 | 0.00000 | Uiso | 1.00 |
| O178  | O  | 0.28325  | 0.87337  | 0.93480 | 0.00000 | Uiso | 1.00 |
| O179  | O  | 0.18055  | 0.84782  | 0.83757 | 0.00000 | Uiso | 1.00 |
| O180  | O  | 0.11620  | 0.72390  | 0.97118 | 0.00000 | Uiso | 1.00 |
| Ti181 | Ti | 0.26291  | 0.74930  | 0.87684 | 0.00000 | Uiso | 1.00 |
| Ti182 | Ti | 0.15768  | 0.88057  | 0.92493 | 0.00000 | Uiso | 1.00 |
| Ti183 | Ti | 0.19957  | 0.86878  | 0.87512 | 0.00000 | Uiso | 1.00 |
| Ti184 | Ti | 0.10057  | 0.75075  | 0.93394 | 0.00000 | Uiso | 1.00 |
| O185  | O  | 0.21219  | 0.74988  | 0.88755 | 0.00000 | Uiso | 1.00 |
| O186  | O  | 0.10889  | 0.87494  | 0.94066 | 0.00000 | Uiso | 1.00 |
| O187  | O  | 0.15089  | 0.85433  | 0.88731 | 0.00000 | Uiso | 1.00 |
| O188  | O  | 0.04891  | 0.76087  | 0.94577 | 0.00000 | Uiso | 1.00 |
| O189  | O  | 0.15430  | 0.74957  | 0.92786 | 0.00000 | Uiso | 1.00 |
| O190  | O  | 0.24748  | 0.87242  | 0.86399 | 0.00000 | Uiso | 1.00 |
| O191  | O  | 0.20562  | 0.90395  | 0.91131 | 0.00000 | Uiso | 1.00 |
| O192  | O  | 0.07446  | 0.77614  | 0.89858 | 0.00000 | Uiso | 1.00 |
| Ti193 | Ti | -0.00693 | 0.00280  | 0.83872 | 0.00000 | Uiso | 1.00 |
| Ti194 | Ti | 0.89088  | 0.12854  | 0.88920 | 0.00000 | Uiso | 1.00 |
| Ti195 | Ti | 0.93662  | 0.12188  | 0.84637 | 0.00000 | Uiso | 1.00 |
| Ti196 | Ti | 0.83360  | 0.00397  | 0.90226 | 0.00000 | Uiso | 1.00 |
| O197  | O  | 0.95198  | 0.00142  | 0.86061 | 0.00000 | Uiso | 1.00 |
| O198  | O  | 0.83915  | 0.12268  | 0.89151 | 0.00000 | Uiso | 1.00 |
| O199  | O  | 0.88669  | 0.10872  | 0.84899 | 0.00000 | Uiso | 1.00 |
| O200  | O  | 0.78410  | 0.03575  | 0.91199 | 0.00000 | Uiso | 1.00 |
| O201  | O  | 0.88783  | -0.00130 | 0.89815 | 0.00000 | Uiso | 1.00 |
| O202  | O  | 0.97719  | 0.12577  | 0.82250 | 0.00000 | Uiso | 1.00 |
| O203  | O  | 0.94166  | 0.15323  | 0.88330 | 0.00000 | Uiso | 1.00 |
| O204  | O  | 0.80878  | -0.02082 | 0.86685 | 0.00000 | Uiso | 1.00 |
| Ti205 | Ti | 0.02089  | -0.00366 | 0.90683 | 0.00000 | Uiso | 1.00 |
| Ti206 | Ti | 0.91302  | 0.12056  | 0.96186 | 0.00000 | Uiso | 1.00 |
| Ti207 | Ti | 0.96444  | 0.12839  | 0.91885 | 0.00000 | Uiso | 1.00 |
| Ti208 | Ti | 0.85606  | -0.00116 | 0.97563 | 0.00000 | Uiso | 1.00 |
| O209  | O  | 0.96626  | 0.00085  | 0.91025 | 0.00000 | Uiso | 1.00 |
| O210  | O  | 0.87410  | 0.12461  | 0.98915 | 0.00000 | Uiso | 1.00 |
| O211  | O  | 0.91315  | 0.15225  | 0.92460 | 0.00000 | Uiso | 1.00 |
| O212  | O  | 0.80615  | -0.02705 | 0.98508 | 0.00000 | Uiso | 1.00 |
| O213  | O  | 0.89447  | -0.00132 | 0.94978 | 0.00000 | Uiso | 1.00 |
| O214  | O  | 0.01872  | 0.12297  | 0.91543 | 0.00000 | Uiso | 1.00 |
| O215  | O  | 0.96433  | 0.10762  | 0.95977 | 0.00000 | Uiso | 1.00 |
| O216  | O  | 0.83618  | 0.03096  | 0.94069 | 0.00000 | Uiso | 1.00 |
| Ti217 | Ti | -0.00851 | 0.25017  | 0.83939 | 0.00000 | Uiso | 1.00 |
| Ti218 | Ti | 0.88880  | 0.36975  | 0.89266 | 0.00000 | Uiso | 1.00 |
| Ti219 | Ti | 0.93450  | 0.38172  | 0.84635 | 0.00000 | Uiso | 1.00 |
| Ti220 | Ti | 0.82944  | 0.24483  | 0.89913 | 0.00000 | Uiso | 1.00 |
| O221  | O  | 0.94807  | 0.25183  | 0.85783 | 0.00000 | Uiso | 1.00 |
| O222  | O  | 0.83816  | 0.37437  | 0.90834 | 0.00000 | Uiso | 1.00 |
| O223  | O  | 0.88305  | 0.39354  | 0.85248 | 0.00000 | Uiso | 1.00 |
| O224  | O  | 0.77970  | 0.21854  | 0.91111 | 0.00000 | Uiso | 1.00 |
| O225  | O  | 0.87795  | 0.25080  | 0.88462 | 0.00000 | Uiso | 1.00 |
| O226  | O  | 0.97804  | 0.37733  | 0.82456 | 0.00000 | Uiso | 1.00 |
| O227  | O  | 0.93778  | 0.34460  | 0.88233 | 0.00000 | Uiso | 1.00 |

|       |    |         |          |         |         |      |      |
|-------|----|---------|----------|---------|---------|------|------|
| O228  | O  | 0.80839 | 0.26218  | 0.86171 | 0.00000 | Uiso | 1.00 |
| Ti229 | Ti | 0.02519 | 0.25264  | 0.90926 | 0.00000 | Uiso | 1.00 |
| Ti230 | Ti | 0.91557 | 0.38117  | 0.96193 | 0.00000 | Uiso | 1.00 |
| Ti231 | Ti | 0.96227 | 0.36960  | 0.91607 | 0.00000 | Uiso | 1.00 |
| Ti232 | Ti | 0.85715 | 0.25111  | 0.97443 | 0.00000 | Uiso | 1.00 |
| O233  | O  | 0.97588 | 0.24927  | 0.92402 | 0.00000 | Uiso | 1.00 |
| O234  | O  | 0.87644 | 0.37563  | 0.98735 | 0.00000 | Uiso | 1.00 |
| O235  | O  | 0.91329 | 0.34303  | 0.92621 | 0.00000 | Uiso | 1.00 |
| O236  | O  | 0.80805 | 0.27833  | 0.98473 | 0.00000 | Uiso | 1.00 |
| O237  | O  | 0.89880 | 0.25225  | 0.95294 | 0.00000 | Uiso | 1.00 |
| O238  | O  | 0.01157 | 0.37411  | 0.90086 | 0.00000 | Uiso | 1.00 |
| O239  | O  | 0.96728 | 0.39306  | 0.95637 | 0.00000 | Uiso | 1.00 |
| O240  | O  | 0.83659 | 0.22372  | 0.93821 | 0.00000 | Uiso | 1.00 |
| Ti241 | Ti | 0.75845 | -0.00272 | 0.88089 | 0.00000 | Uiso | 1.00 |
| Ti242 | Ti | 0.65717 | 0.12760  | 0.92697 | 0.00000 | Uiso | 1.00 |
| Ti243 | Ti | 0.69826 | 0.12364  | 0.87676 | 0.00000 | Uiso | 1.00 |
| Ti244 | Ti | 0.59899 | -0.00101 | 0.93167 | 0.00000 | Uiso | 1.00 |
| O245  | O  | 0.70556 | -0.00465 | 0.89048 | 0.00000 | Uiso | 1.00 |
| O246  | O  | 0.60763 | 0.12119  | 0.94138 | 0.00000 | Uiso | 1.00 |
| O247  | O  | 0.65039 | 0.15381  | 0.88920 | 0.00000 | Uiso | 1.00 |
| O248  | O  | 0.54868 | 0.00723  | 0.94675 | 0.00000 | Uiso | 1.00 |
| O249  | O  | 0.64954 | -0.00088 | 0.91563 | 0.00000 | Uiso | 1.00 |
| O250  | O  | 0.74607 | 0.11559  | 0.86310 | 0.00000 | Uiso | 1.00 |
| O251  | O  | 0.70716 | 0.15419  | 0.91453 | 0.00000 | Uiso | 1.00 |
| O252  | O  | 0.57092 | 0.02716  | 0.89846 | 0.00000 | Uiso | 1.00 |
| Ti253 | Ti | 0.78838 | 0.00373  | 0.94889 | 0.00000 | Uiso | 1.00 |
| Ti254 | Ti | 0.62985 | 0.11452  | 0.85622 | 0.00000 | Uiso | 1.00 |
| Ti255 | Ti | 0.72770 | 0.12667  | 0.95041 | 0.00000 | Uiso | 1.00 |
| Ti256 | Ti | 0.56960 | -0.00436 | 0.86000 | 0.00000 | Uiso | 1.00 |
| O257  | O  | 0.74047 | -0.00332 | 0.95770 | 0.00000 | Uiso | 1.00 |
| O258  | O  | 0.58117 | 0.12013  | 0.84216 | 0.00000 | Uiso | 1.00 |
| O259  | O  | 0.67903 | 0.10841  | 0.96410 | 0.00000 | Uiso | 1.00 |
| O260  | O  | 0.51955 | -0.02372 | 0.87075 | 0.00000 | Uiso | 1.00 |
| O261  | O  | 0.61636 | -0.00556 | 0.87340 | 0.00000 | Uiso | 1.00 |
| O262  | O  | 0.77954 | 0.12633  | 0.96080 | 0.00000 | Uiso | 1.00 |
| O263  | O  | 0.67675 | 0.09431  | 0.84060 | 0.00000 | Uiso | 1.00 |
| O264  | O  | 0.61948 | -0.02954 | 0.96694 | 0.00000 | Uiso | 1.00 |
| Ti265 | Ti | 0.75941 | 0.24539  | 0.87487 | 0.00000 | Uiso | 1.00 |
| Ti266 | Ti | 0.65416 | 0.36838  | 0.92308 | 0.00000 | Uiso | 1.00 |
| Ti267 | Ti | 0.69884 | 0.36762  | 0.87635 | 0.00000 | Uiso | 1.00 |
| Ti268 | Ti | 0.59498 | 0.24751  | 0.93629 | 0.00000 | Uiso | 1.00 |
| O269  | O  | 0.70780 | 0.24572  | 0.86442 | 0.00000 | Uiso | 1.00 |
| O270  | O  | 0.60026 | 0.37325  | 0.92367 | 0.00000 | Uiso | 1.00 |
| O271  | O  | 0.65189 | 0.33513  | 0.88634 | 0.00000 | Uiso | 1.00 |
| O272  | O  | 0.54188 | 0.23578  | 0.94520 | 0.00000 | Uiso | 1.00 |
| O273  | O  | 0.64731 | 0.24956  | 0.93427 | 0.00000 | Uiso | 1.00 |
| O274  | O  | 0.74677 | 0.37557  | 0.86672 | 0.00000 | Uiso | 1.00 |
| O275  | O  | 0.70380 | 0.33523  | 0.91320 | 0.00000 | Uiso | 1.00 |
| O276  | O  | 0.57084 | 0.22065  | 0.90058 | 0.00000 | Uiso | 1.00 |
| Ti277 | Ti | 0.78834 | 0.24924  | 0.94887 | 0.00000 | Uiso | 1.00 |
| Ti278 | Ti | 0.63152 | 0.37864  | 0.85502 | 0.00000 | Uiso | 1.00 |



|       |    |         |          |         |         |      |      |
|-------|----|---------|----------|---------|---------|------|------|
| Ti279 | Ti | 0.72917 | 0.37475  | 0.94392 | 0.00000 | Uiso | 1.00 |
| Ti280 | Ti | 0.57330 | 0.24591  | 0.86075 | 0.00000 | Uiso | 1.00 |
| O281  | O  | 0.74065 | 0.25663  | 0.96197 | 0.00000 | Uiso | 1.00 |
| O282  | O  | 0.58370 | 0.37081  | 0.84295 | 0.00000 | Uiso | 1.00 |
| O283  | O  | 0.67982 | 0.39465  | 0.95812 | 0.00000 | Uiso | 1.00 |
| O284  | O  | 0.52526 | 0.27887  | 0.86898 | 0.00000 | Uiso | 1.00 |
| O285  | O  | 0.62122 | 0.24805  | 0.86842 | 0.00000 | Uiso | 1.00 |
| O286  | O  | 0.78198 | 0.37655  | 0.93492 | 0.00000 | Uiso | 1.00 |
| O287  | O  | 0.67901 | 0.39911  | 0.83992 | 0.00000 | Uiso | 1.00 |
| O288  | O  | 0.60774 | 0.27573  | 0.97421 | 0.00000 | Uiso | 1.00 |
| Ti289 | Ti | 0.52320 | 0.00267  | 0.91035 | 0.00000 | Uiso | 1.00 |
| Ti290 | Ti | 0.41327 | 0.13138  | 0.96129 | 0.00000 | Uiso | 1.00 |
| Ti291 | Ti | 0.46041 | 0.11891  | 0.91590 | 0.00000 | Uiso | 1.00 |
| Ti292 | Ti | 0.35727 | 0.00018  | 0.97401 | 0.00000 | Uiso | 1.00 |
| O293  | O  | 0.47428 | -0.00182 | 0.92477 | 0.00000 | Uiso | 1.00 |
| O294  | O  | 0.37461 | 0.12607  | 0.98894 | 0.00000 | Uiso | 1.00 |
| O295  | O  | 0.41021 | 0.09408  | 0.92462 | 0.00000 | Uiso | 1.00 |
| O296  | O  | 0.30834 | -0.02656 | 0.98435 | 0.00000 | Uiso | 1.00 |
| O297  | O  | 0.39869 | -0.00042 | 0.95226 | 0.00000 | Uiso | 1.00 |
| O298  | O  | 0.51013 | 0.12363  | 0.90215 | 0.00000 | Uiso | 1.00 |
| O299  | O  | 0.46479 | 0.14376  | 0.95615 | 0.00000 | Uiso | 1.00 |
| O300  | O  | 0.33710 | 0.02669  | 0.93763 | 0.00000 | Uiso | 1.00 |
| Ti301 | Ti | 0.48793 | -0.00064 | 0.83933 | 0.00000 | Uiso | 1.00 |
| Ti302 | Ti | 0.39027 | 0.11943  | 0.88856 | 0.00000 | Uiso | 1.00 |
| Ti303 | Ti | 0.43473 | 0.13188  | 0.84484 | 0.00000 | Uiso | 1.00 |
| Ti304 | Ti | 0.32982 | 0.00256  | 0.89873 | 0.00000 | Uiso | 1.00 |
| O305  | O  | 0.43704 | 0.00063  | 0.83563 | 0.00000 | Uiso | 1.00 |
| O306  | O  | 0.33882 | 0.12558  | 0.89138 | 0.00000 | Uiso | 1.00 |
| O307  | O  | 0.38513 | 0.14603  | 0.84906 | 0.00000 | Uiso | 1.00 |
| O308  | O  | 0.28004 | 0.02775  | 0.91058 | 0.00000 | Uiso | 1.00 |
| O309  | O  | 0.37844 | -0.00190 | 0.88394 | 0.00000 | Uiso | 1.00 |
| O310  | O  | 0.47972 | 0.12790  | 0.82558 | 0.00000 | Uiso | 1.00 |
| O311  | O  | 0.43983 | 0.08896  | 0.88074 | 0.00000 | Uiso | 1.00 |
| O312  | O  | 0.30780 | -0.01761 | 0.86185 | 0.00000 | Uiso | 1.00 |
| Ti313 | Ti | 0.52029 | 0.24561  | 0.90764 | 0.00000 | Uiso | 1.00 |
| Ti314 | Ti | 0.41403 | 0.37008  | 0.96185 | 0.00000 | Uiso | 1.00 |
| Ti315 | Ti | 0.46435 | 0.37843  | 0.91875 | 0.00000 | Uiso | 1.00 |
| Ti316 | Ti | 0.35547 | 0.25087  | 0.97565 | 0.00000 | Uiso | 1.00 |
| O317  | O  | 0.46561 | 0.25079  | 0.90989 | 0.00000 | Uiso | 1.00 |
| O318  | O  | 0.37528 | 0.37539  | 0.98722 | 0.00000 | Uiso | 1.00 |
| O319  | O  | 0.41462 | 0.40564  | 0.92577 | 0.00000 | Uiso | 1.00 |
| O320  | O  | 0.30524 | 0.27339  | 0.98512 | 0.00000 | Uiso | 1.00 |
| O321  | O  | 0.39359 | 0.25252  | 0.94958 | 0.00000 | Uiso | 1.00 |
| O322  | O  | 0.51837 | 0.37236  | 0.91609 | 0.00000 | Uiso | 1.00 |
| O323  | O  | 0.46498 | 0.35521  | 0.95937 | 0.00000 | Uiso | 1.00 |
| O324  | O  | 0.33569 | 0.21621  | 0.94093 | 0.00000 | Uiso | 1.00 |
| Ti325 | Ti | 0.49257 | 0.24890  | 0.84114 | 0.00000 | Uiso | 1.00 |
| Ti326 | Ti | 0.38985 | 0.37722  | 0.89321 | 0.00000 | Uiso | 1.00 |
| Ti327 | Ti | 0.43241 | 0.36296  | 0.84694 | 0.00000 | Uiso | 1.00 |
| Ti328 | Ti | 0.33451 | 0.24423  | 0.90250 | 0.00000 | Uiso | 1.00 |
| O329  | O  | 0.45049 | 0.24648  | 0.86113 | 0.00000 | Uiso | 1.00 |

|       |    |         |          |         |         |      |      |
|-------|----|---------|----------|---------|---------|------|------|
| O330  | O  | 0.33946 | 0.37281  | 0.90939 | 0.00000 | Uiso | 1.00 |
| O331  | O  | 0.38187 | 0.35098  | 0.85399 | 0.00000 | Uiso | 1.00 |
| O332  | O  | 0.28456 | 0.21599  | 0.91088 | 0.00000 | Uiso | 1.00 |
| O333  | O  | 0.38887 | 0.24808  | 0.89870 | 0.00000 | Uiso | 1.00 |
| O334  | O  | 0.47526 | 0.36411  | 0.82442 | 0.00000 | Uiso | 1.00 |
| O335  | O  | 0.43998 | 0.40553  | 0.88289 | 0.00000 | Uiso | 1.00 |
| O336  | O  | 0.31364 | 0.26997  | 0.86593 | 0.00000 | Uiso | 1.00 |
| Ti337 | Ti | 0.28901 | 0.00026  | 0.94826 | 0.00000 | Uiso | 1.00 |
| Ti338 | Ti | 0.13451 | 0.12391  | 0.85178 | 0.00000 | Uiso | 1.00 |
| Ti339 | Ti | 0.22630 | 0.11922  | 0.94984 | 0.00000 | Uiso | 1.00 |
| Ti340 | Ti | 0.07536 | -0.00239 | 0.85919 | 0.00000 | Uiso | 1.00 |
| O341  | O  | 0.24217 | -0.00798 | 0.96093 | 0.00000 | Uiso | 1.00 |
| O342  | O  | 0.08572 | 0.12342  | 0.84179 | 0.00000 | Uiso | 1.00 |
| O343  | O  | 0.17552 | 0.10738  | 0.96108 | 0.00000 | Uiso | 1.00 |
| O344  | O  | 0.02653 | 0.02818  | 0.86741 | 0.00000 | Uiso | 1.00 |
| O345  | O  | 0.12442 | -0.00175 | 0.86724 | 0.00000 | Uiso | 1.00 |
| O346  | O  | 0.27845 | 0.12175  | 0.95976 | 0.00000 | Uiso | 1.00 |
| O347  | O  | 0.18193 | 0.14819  | 0.83711 | 0.00000 | Uiso | 1.00 |
| O348  | O  | 0.11628 | 0.02516  | 0.96775 | 0.00000 | Uiso | 1.00 |
| Ti349 | Ti | 0.25834 | -0.00051 | 0.87481 | 0.00000 | Uiso | 1.00 |
| Ti350 | Ti | 0.15592 | 0.11975  | 0.92238 | 0.00000 | Uiso | 1.00 |
| Ti351 | Ti | 0.20156 | 0.13034  | 0.87475 | 0.00000 | Uiso | 1.00 |
| Ti352 | Ti | 0.09719 | -0.00139 | 0.93180 | 0.00000 | Uiso | 1.00 |
| O353  | O  | 0.20445 | -0.00034 | 0.86681 | 0.00000 | Uiso | 1.00 |
| O354  | O  | 0.10200 | 0.12592  | 0.92345 | 0.00000 | Uiso | 1.00 |
| O355  | O  | 0.15437 | 0.14649  | 0.88546 | 0.00000 | Uiso | 1.00 |
| O356  | O  | 0.04556 | -0.01002 | 0.94443 | 0.00000 | Uiso | 1.00 |
| O357  | O  | 0.14547 | -0.00097 | 0.91637 | 0.00000 | Uiso | 1.00 |
| O358  | O  | 0.24926 | 0.12690  | 0.86126 | 0.00000 | Uiso | 1.00 |
| O359  | O  | 0.20721 | 0.09891  | 0.91322 | 0.00000 | Uiso | 1.00 |
| O360  | O  | 0.07077 | -0.02833 | 0.89835 | 0.00000 | Uiso | 1.00 |
| Ti361 | Ti | 0.28767 | 0.24458  | 0.94863 | 0.00000 | Uiso | 1.00 |
| Ti362 | Ti | 0.13284 | 0.37035  | 0.85205 | 0.00000 | Uiso | 1.00 |
| Ti363 | Ti | 0.23026 | 0.37575  | 0.94382 | 0.00000 | Uiso | 1.00 |
| Ti364 | Ti | 0.07350 | 0.24737  | 0.85925 | 0.00000 | Uiso | 1.00 |
| O365  | O  | 0.23866 | 0.25146  | 0.95746 | 0.00000 | Uiso | 1.00 |
| O366  | O  | 0.08311 | 0.37164  | 0.84052 | 0.00000 | Uiso | 1.00 |
| O367  | O  | 0.18234 | 0.39121  | 0.96070 | 0.00000 | Uiso | 1.00 |
| O368  | O  | 0.02429 | 0.22264  | 0.86930 | 0.00000 | Uiso | 1.00 |
| O369  | O  | 0.12099 | 0.24582  | 0.86818 | 0.00000 | Uiso | 1.00 |
| O370  | O  | 0.28299 | 0.37317  | 0.93549 | 0.00000 | Uiso | 1.00 |
| O371  | O  | 0.18054 | 0.34779  | 0.83772 | 0.00000 | Uiso | 1.00 |
| O372  | O  | 0.11609 | 0.22386  | 0.97126 | 0.00000 | Uiso | 1.00 |
| Ti373 | Ti | 0.26278 | 0.24955  | 0.87724 | 0.00000 | Uiso | 1.00 |
| Ti374 | Ti | 0.15762 | 0.38053  | 0.92507 | 0.00000 | Uiso | 1.00 |
| Ti375 | Ti | 0.19947 | 0.36871  | 0.87529 | 0.00000 | Uiso | 1.00 |
| Ti376 | Ti | 0.10052 | 0.25071  | 0.93401 | 0.00000 | Uiso | 1.00 |
| O377  | O  | 0.21203 | 0.24992  | 0.88777 | 0.00000 | Uiso | 1.00 |
| O378  | O  | 0.10881 | 0.37498  | 0.94073 | 0.00000 | Uiso | 1.00 |
| O379  | O  | 0.15079 | 0.35437  | 0.88744 | 0.00000 | Uiso | 1.00 |
| O380  | O  | 0.04885 | 0.26084  | 0.94580 | 0.00000 | Uiso | 1.00 |

|      |   |          |          |         |         |      |      |
|------|---|----------|----------|---------|---------|------|------|
| O381 | O | 0.15426  | 0.24950  | 0.92802 | 0.00000 | Uiso | 1.00 |
| O382 | O | 0.24736  | 0.37226  | 0.86415 | 0.00000 | Uiso | 1.00 |
| O383 | O | 0.20559  | 0.40375  | 0.91153 | 0.00000 | Uiso | 1.00 |
| O384 | O | 0.07445  | 0.27608  | 0.89862 | 0.00000 | Uiso | 1.00 |
| C385 | C | -0.61686 | -0.38008 | 0.51593 | 0.00000 | Uiso | 1.00 |
| C386 | C | -0.60832 | -0.35971 | 0.53971 | 0.00000 | Uiso | 1.00 |
| C387 | C | -0.59916 | -0.33782 | 0.56575 | 0.00000 | Uiso | 1.00 |
| C388 | C | -0.59110 | -0.31764 | 0.58962 | 0.00000 | Uiso | 1.00 |
| C389 | C | -0.58278 | -0.29487 | 0.61577 | 0.00000 | Uiso | 1.00 |
| C390 | C | -0.57581 | -0.27278 | 0.63973 | 0.00000 | Uiso | 1.00 |
| C391 | C | -0.56899 | -0.24599 | 0.66643 | 0.00000 | Uiso | 1.00 |
| C392 | C | -0.57122 | -0.16224 | 0.67429 | 0.00000 | Uiso | 1.00 |
| S393 | S | -0.55997 | -0.32121 | 0.69486 | 0.00000 | Uiso | 1.00 |
| C394 | C | -0.56657 | -0.14989 | 0.70273 | 0.00000 | Uiso | 1.00 |
| H395 | H | -0.57723 | -0.10856 | 0.65999 | 0.00000 | Uiso | 1.00 |
| C396 | C | -0.56065 | -0.22397 | 0.71715 | 0.00000 | Uiso | 1.00 |
| H397 | H | -0.56871 | -0.08518 | 0.71241 | 0.00000 | Uiso | 1.00 |
| C398 | C | -0.55898 | -0.22295 | 0.74639 | 0.00000 | Uiso | 1.00 |
| H399 | H | -0.56468 | -0.15995 | 0.75626 | 0.00000 | Uiso | 1.00 |
| C400 | C | -0.55272 | -0.29155 | 0.76389 | 0.00000 | Uiso | 1.00 |
| C401 | C | -0.54189 | -0.37341 | 0.75557 | 0.00000 | Uiso | 1.00 |
| P402 | P | -0.56023 | -0.27557 | 0.80182 | 0.00000 | Uiso | 1.00 |
| O403 | O | -0.57531 | -0.16909 | 0.80868 | 0.00000 | Uiso | 1.00 |
| O404 | O | -0.58954 | -0.35239 | 0.81414 | 0.00000 | Uiso | 1.00 |
| N405 | N | -0.53246 | -0.44372 | 0.74919 | 0.00000 | Uiso | 1.00 |
| C406 | C | -0.64463 | -0.45363 | 0.44067 | 0.00000 | Uiso | 1.00 |
| C407 | C | -0.64380 | -0.53648 | 0.43160 | 0.00000 | Uiso | 1.00 |
| S408 | S | -0.65992 | -0.37527 | 0.41499 | 0.00000 | Uiso | 1.00 |
| C409 | C | -0.65472 | -0.54574 | 0.40416 | 0.00000 | Uiso | 1.00 |
| H410 | H | -0.63550 | -0.59183 | 0.44443 | 0.00000 | Uiso | 1.00 |
| C411 | C | -0.66370 | -0.47002 | 0.39199 | 0.00000 | Uiso | 1.00 |
| H412 | H | -0.65585 | -0.60909 | 0.39359 | 0.00000 | Uiso | 1.00 |
| H413 | H | -0.68113 | -0.52639 | 0.35487 | 0.00000 | Uiso | 1.00 |
| C414 | C | -0.68411 | -0.38722 | 0.35056 | 0.00000 | Uiso | 1.00 |
| C415 | C | -0.70730 | -0.38093 | 0.33023 | 0.00000 | Uiso | 1.00 |
| C416 | C | -0.70375 | -0.29735 | 0.31858 | 0.00000 | Uiso | 1.00 |
| H417 | H | -0.72499 | -0.43223 | 0.32363 | 0.00000 | Uiso | 1.00 |
| C418 | C | -0.67803 | -0.25630 | 0.33173 | 0.00000 | Uiso | 1.00 |
| H419 | H | -0.71877 | -0.27056 | 0.30137 | 0.00000 | Uiso | 1.00 |
| H420 | H | -0.66884 | -0.19024 | 0.32691 | 0.00000 | Uiso | 1.00 |
| N421 | N | -0.67606 | -0.46701 | 0.36529 | 0.00000 | Uiso | 1.00 |
| N422 | N | -0.66428 | -0.30868 | 0.35171 | 0.00000 | Uiso | 1.00 |
| H423 | H | -0.64319 | -0.29509 | 0.36464 | 0.00000 | Uiso | 1.00 |
| O424 | O | 0.47320  | 0.70801  | 0.81840 | 0.00000 | Uiso | 1.00 |
| C425 | C | 0.37378  | 0.59763  | 0.48989 | 0.00000 | Uiso | 1.00 |
| C426 | C | 0.36526  | 0.57733  | 0.46618 | 0.00000 | Uiso | 1.00 |
| H427 | H | 0.35992  | 0.83607  | 0.84083 | 0.00000 | Uiso | 1.00 |
| H428 | H | 0.36243  | 0.63196  | 0.83511 | 0.00000 | Uiso | 1.00 |

loop\_

\_geom\_bond\_atom\_site\_label\_1

\_geom\_bond\_atom\_site\_label\_2

```

_geom_bond_distance
_geom_bond_site_symmetry_2
_ccdc_geom_bond_type
Ti1 O5 1.900 1_455 S
Ti1 O10 2.103 1_455 S
Ti1 O152 1.919 . S
Ti1 O226 2.093 1_455 S
Ti2 O6 2.006 . S
Ti2 O11 2.019 . S
Ti2 O9 2.010 . S
Ti2 O19 1.924 . S
Ti2 O7 1.941 . S
Ti2 O33 1.925 . S
Ti3 O7 1.946 . S
Ti3 O10 1.938 . S
Ti3 O5 2.030 . S
Ti3 O29 2.085 . S
Ti3 O11 1.828 . S
Ti4 O8 2.028 . S
Ti4 O9 2.109 . S
Ti4 O24 1.874 . S
Ti4 O6 1.877 . S
Ti4 O222 1.987 . S
Ti4 O12 1.973 . S
O5 Ti1 1.900 1_655 S
O5 Ti219 2.046 . S
O6 Ti28 1.917 . S
O8 Ti61 1.827 . S
O8 Ti49 1.872 . S
O9 Ti218 1.966 . S
O10 Ti1 2.103 1_655 S
O10 Ti25 2.117 1_655 S
O11 Ti15 1.942 . S
O12 Ti49 2.076 . S
Ti13 O17 2.121 1_455 S
Ti13 O168 2.006 . S
Ti13 O22 1.957 . S
Ti13 O152 1.946 . S
Ti13 O164 2.028 . S
Ti13 O238 1.903 . S
Ti14 O18 1.988 . S
Ti14 O23 1.997 . S
Ti14 O21 2.057 . S
Ti14 O19 1.834 . S
Ti14 O45 2.107 . S
Ti15 O19 2.035 . S
Ti15 O22 2.108 1_655 S
Ti15 O17 1.971 . S
Ti15 O41 1.895 . S
Ti15 O23 1.970 . S
Ti16 O20 2.021 . S

```

|      |       |       |       |   |
|------|-------|-------|-------|---|
| Ti16 | O21   | 1.928 | .     | S |
| Ti16 | O18   | 2.123 | .     | S |
| Ti16 | O234  | 2.097 | .     | S |
| Ti16 | O24   | 1.893 | .     | S |
| O17  | Ti13  | 2.121 | 1_655 | S |
| O17  | Ti231 | 2.008 | .     | S |
| O18  | Ti40  | 2.138 | .     | S |
| O20  | Ti61  | 1.909 | .     | S |
| O21  | Ti230 | 2.037 | .     | S |
| O22  | Ti15  | 2.108 | 1_455 | S |
| O22  | Ti37  | 1.996 | .     | S |
| O24  | Ti61  | 1.934 | .     | S |
| Ti25 | O29   | 1.895 | 1_455 | S |
| Ti25 | O34   | 2.111 | 1_455 | S |
| Ti25 | O176  | 1.950 | .     | S |
| Ti25 | O10   | 2.117 | 1_455 | S |
| Ti26 | O30   | 2.097 | .     | S |
| Ti26 | O35   | 1.994 | .     | S |
| Ti26 | O33   | 1.884 | .     | S |
| Ti26 | O43   | 1.898 | .     | S |
| Ti26 | O31   | 1.956 | .     | S |
| Ti26 | O201  | 1.966 | 1_565 | S |
| Ti27 | O31   | 2.020 | .     | S |
| Ti27 | O34   | 1.978 | .     | S |
| Ti27 | O29   | 2.103 | .     | S |
| Ti27 | O197  | 2.046 | 1_565 | S |
| Ti27 | O35   | 1.804 | .     | S |
| Ti28 | O32   | 2.046 | .     | S |
| Ti28 | O33   | 2.002 | .     | S |
| Ti28 | O48   | 1.905 | .     | S |
| Ti28 | O30   | 2.033 | .     | S |
| Ti28 | O36   | 1.974 | .     | S |
| O29  | Ti25  | 1.895 | 1_655 | S |
| O30  | Ti196 | 1.987 | 1_565 | S |
| O32  | Ti85  | 1.884 | .     | S |
| O32  | Ti73  | 1.936 | .     | S |
| O34  | Ti25  | 2.111 | 1_655 | S |
| O34  | Ti193 | 2.093 | 1_665 | S |
| O35  | Ti39  | 1.900 | .     | S |
| O36  | Ti73  | 2.012 | .     | S |
| Ti37 | O41   | 2.033 | 1_455 | S |
| Ti37 | O192  | 2.003 | .     | S |
| Ti37 | O46   | 1.950 | .     | S |
| Ti37 | O176  | 1.952 | .     | S |
| Ti37 | O188  | 1.967 | .     | S |
| Ti38 | O42   | 1.939 | .     | S |
| Ti38 | O47   | 2.026 | .     | S |
| Ti38 | O45   | 2.096 | .     | S |
| Ti38 | O43   | 1.795 | .     | S |
| Ti38 | O213  | 2.037 | 1_565 | S |
| Ti39 | O43   | 1.996 | .     | S |

|      |       |       |       |   |
|------|-------|-------|-------|---|
| Ti39 | O46   | 2.041 | 1_655 | S |
| Ti39 | O41   | 1.929 | .     | S |
| Ti39 | O209  | 2.008 | 1_565 | S |
| Ti39 | O47   | 1.957 | .     | S |
| Ti40 | O44   | 2.005 | .     | S |
| Ti40 | O45   | 1.908 | .     | S |
| Ti40 | O42   | 2.114 | .     | S |
| Ti40 | O48   | 1.941 | .     | S |
| O41  | Ti37  | 2.033 | 1_655 | S |
| O42  | Ti208 | 2.097 | 1_565 | S |
| O44  | Ti85  | 1.918 | .     | S |
| O46  | Ti39  | 2.041 | 1_455 | S |
| O46  | Ti205 | 1.903 | 1_565 | S |
| O48  | Ti85  | 1.972 | .     | S |
| Ti49 | O53   | 2.096 | .     | S |
| Ti49 | O58   | 2.035 | .     | S |
| Ti49 | O274  | 2.011 | .     | S |
| Ti50 | O54   | 2.035 | .     | S |
| Ti50 | O59   | 2.062 | .     | S |
| Ti50 | O57   | 2.036 | .     | S |
| Ti50 | O67   | 1.977 | .     | S |
| Ti50 | O55   | 1.855 | .     | S |
| Ti50 | O81   | 1.913 | .     | S |
| Ti51 | O55   | 1.997 | .     | S |
| Ti51 | O58   | 1.965 | .     | S |
| Ti51 | O71   | 1.962 | .     | S |
| Ti51 | O53   | 2.065 | .     | S |
| Ti51 | O77   | 1.970 | .     | S |
| Ti51 | O59   | 1.886 | .     | S |
| Ti52 | O56   | 2.074 | .     | S |
| Ti52 | O57   | 2.098 | .     | S |
| Ti52 | O72   | 1.903 | .     | S |
| Ti52 | O54   | 1.930 | .     | S |
| Ti52 | O270  | 1.938 | .     | S |
| Ti52 | O60   | 1.963 | .     | S |
| O53  | Ti267 | 2.059 | .     | S |
| O54  | Ti76  | 1.983 | .     | S |
| O55  | Ti62  | 1.857 | .     | S |
| O56  | Ti97  | 1.993 | .     | S |
| O57  | Ti266 | 2.014 | .     | S |
| O58  | Ti73  | 2.103 | .     | S |
| O59  | Ti63  | 1.927 | .     | S |
| O60  | Ti97  | 1.965 | .     | S |
| O60  | Ti64  | 1.884 | .     | S |
| Ti61 | O65   | 1.903 | .     | S |
| Ti61 | O70   | 1.966 | .     | S |
| Ti61 | O286  | 2.048 | .     | S |
| Ti62 | O66   | 2.007 | .     | S |
| Ti62 | O71   | 1.987 | .     | S |
| Ti62 | O69   | 2.059 | .     | S |
| Ti62 | O93   | 2.127 | .     | S |

|      |       |       |       |   |
|------|-------|-------|-------|---|
| Ti63 | O67   | 2.011 | .     | S |
| Ti63 | O70   | 2.065 | .     | S |
| Ti63 | O65   | 2.054 | .     | S |
| Ti63 | O89   | 2.099 | .     | S |
| Ti64 | O68   | 2.030 | .     | S |
| Ti64 | O69   | 1.918 | .     | S |
| Ti64 | O66   | 2.117 | .     | S |
| Ti64 | O282  | 2.098 | .     | S |
| O65  | Ti279 | 2.003 | .     | S |
| O66  | Ti88  | 2.125 | .     | S |
| O68  | Ti97  | 1.950 | .     | S |
| O68  | Ti109 | 1.967 | .     | S |
| O69  | Ti278 | 2.032 | .     | S |
| O70  | Ti85  | 1.970 | .     | S |
| Ti73 | O77   | 2.059 | .     | S |
| Ti73 | O82   | 2.063 | .     | S |
| Ti74 | O78   | 2.087 | .     | S |
| Ti74 | O83   | 2.040 | .     | S |
| Ti74 | O81   | 1.890 | .     | S |
| Ti74 | O91   | 1.979 | .     | S |
| Ti74 | O79   | 1.818 | .     | S |
| Ti74 | O249  | 2.014 | 1_565 | S |
| Ti75 | O79   | 1.940 | .     | S |
| Ti75 | O82   | 1.915 | .     | S |
| Ti75 | O95   | 1.954 | .     | S |
| Ti75 | O77   | 1.958 | .     | S |
| Ti75 | O245  | 2.060 | 1_565 | S |
| Ti75 | O83   | 1.828 | .     | S |
| Ti76 | O80   | 2.103 | .     | S |
| Ti76 | O81   | 2.027 | .     | S |
| Ti76 | O96   | 1.917 | .     | S |
| Ti76 | O78   | 2.003 | .     | S |
| Ti76 | O84   | 1.978 | .     | S |
| O78  | Ti244 | 1.939 | 1_565 | S |
| O79  | Ti86  | 1.810 | .     | S |
| O80  | Ti121 | 1.973 | .     | S |
| O82  | Ti241 | 2.012 | 1_565 | S |
| O83  | Ti87  | 1.859 | .     | S |
| O84  | Ti121 | 2.014 | .     | S |
| O84  | Ti88  | 1.930 | .     | S |
| Ti85 | O89   | 1.951 | .     | S |
| Ti85 | O94   | 2.049 | .     | S |
| Ti86 | O90   | 1.945 | .     | S |
| Ti86 | O95   | 1.999 | .     | S |
| Ti86 | O93   | 2.112 | .     | S |
| Ti86 | O261  | 2.035 | 1_565 | S |
| Ti87 | O91   | 2.047 | .     | S |
| Ti87 | O94   | 2.087 | .     | S |
| Ti87 | O89   | 2.029 | .     | S |
| Ti87 | O257  | 2.003 | 1_565 | S |
| Ti88 | O92   | 1.975 | .     | S |

|       |       |       |       |   |
|-------|-------|-------|-------|---|
| Ti88  | O93   | 1.893 | .     | S |
| Ti88  | O90   | 2.112 | .     | S |
| O90   | Ti256 | 2.104 | 1_565 | S |
| O92   | Ti121 | 1.856 | .     | S |
| O92   | Ti133 | 1.860 | .     | S |
| O94   | Ti253 | 2.048 | 1_565 | S |
| Ti97  | O101  | 2.013 | .     | S |
| Ti97  | O106  | 1.944 | .     | S |
| Ti97  | O322  | 1.981 | .     | S |
| Ti98  | O102  | 1.995 | .     | S |
| Ti98  | O107  | 2.024 | .     | S |
| Ti98  | O105  | 2.116 | .     | S |
| Ti98  | O103  | 1.827 | .     | S |
| Ti98  | O129  | 2.061 | .     | S |
| Ti99  | O103  | 2.009 | .     | S |
| Ti99  | O106  | 2.029 | .     | S |
| Ti99  | O119  | 1.910 | .     | S |
| Ti99  | O101  | 1.948 | .     | S |
| Ti99  | O125  | 2.019 | .     | S |
| Ti99  | O107  | 1.958 | .     | S |
| Ti100 | O104  | 1.998 | .     | S |
| Ti100 | O105  | 1.908 | .     | S |
| Ti100 | O102  | 2.138 | .     | S |
| Ti100 | O318  | 2.113 | .     | S |
| Ti100 | O108  | 1.936 | .     | S |
| O101  | Ti315 | 1.890 | .     | S |
| O102  | Ti124 | 2.116 | .     | S |
| O103  | Ti110 | 1.900 | .     | S |
| O104  | Ti145 | 1.915 | .     | S |
| O105  | Ti314 | 2.090 | .     | S |
| O106  | Ti121 | 1.909 | .     | S |
| O108  | Ti145 | 1.967 | .     | S |
| O108  | Ti112 | 1.898 | .     | S |
| Ti109 | O113  | 1.970 | .     | S |
| Ti109 | O118  | 2.046 | .     | S |
| Ti109 | O334  | 2.082 | .     | S |
| Ti110 | O114  | 2.006 | .     | S |
| Ti110 | O119  | 2.017 | .     | S |
| Ti110 | O117  | 1.899 | .     | S |
| Ti110 | O141  | 2.031 | .     | S |
| Ti110 | O115  | 1.852 | .     | S |
| Ti111 | O115  | 1.966 | .     | S |
| Ti111 | O118  | 1.954 | .     | S |
| Ti111 | O113  | 2.037 | .     | S |
| Ti111 | O137  | 1.977 | .     | S |
| Ti111 | O119  | 1.883 | .     | S |
| Ti111 | O404  | 1.681 | 1_665 | S |
| Ti112 | O116  | 2.040 | .     | S |
| Ti112 | O117  | 1.999 | .     | S |
| Ti112 | O114  | 1.924 | .     | S |
| Ti112 | O330  | 2.036 | .     | S |



|       |       |       |       |   |
|-------|-------|-------|-------|---|
| Ti112 | O120  | 1.972 | .     | S |
| O113  | Ti327 | 2.053 | .     | S |
| O114  | Ti136 | 1.888 | .     | S |
| O115  | H428  | 1.140 | .     | S |
| O116  | Ti145 | 1.871 | .     | S |
| O116  | Ti157 | 1.944 | .     | S |
| O117  | Ti326 | 1.868 | .     | S |
| O118  | Ti133 | 2.018 | .     | S |
| O120  | Ti157 | 2.028 | .     | S |
| Ti121 | O125  | 2.115 | .     | S |
| Ti121 | O130  | 1.954 | .     | S |
| Ti122 | O126  | 1.928 | .     | S |
| Ti122 | O131  | 1.991 | .     | S |
| Ti122 | O129  | 2.032 | .     | S |
| Ti122 | O127  | 1.797 | .     | S |
| Ti122 | O297  | 2.092 | 1_565 | S |
| Ti123 | O127  | 1.981 | .     | S |
| Ti123 | O130  | 2.091 | .     | S |
| Ti123 | O143  | 2.003 | .     | S |
| Ti123 | O125  | 1.978 | .     | S |
| Ti123 | O293  | 1.894 | 1_565 | S |
| Ti123 | O131  | 1.962 | .     | S |
| Ti124 | O128  | 2.022 | .     | S |
| Ti124 | O129  | 1.928 | .     | S |
| Ti124 | O126  | 2.097 | .     | S |
| Ti124 | O132  | 1.892 | .     | S |
| O126  | Ti292 | 2.110 | 1_565 | S |
| O127  | Ti134 | 1.856 | .     | S |
| O128  | Ti169 | 1.911 | .     | S |
| O130  | Ti289 | 1.991 | 1_565 | S |
| O132  | Ti169 | 1.947 | .     | S |
| O132  | Ti136 | 1.884 | .     | S |
| Ti133 | O137  | 1.935 | .     | S |
| Ti133 | O142  | 2.023 | .     | S |
| Ti134 | O138  | 2.107 | .     | S |
| Ti134 | O143  | 2.065 | .     | S |
| Ti134 | O141  | 1.999 | .     | S |
| Ti134 | O309  | 1.898 | 1_565 | S |
| Ti134 | O139  | 1.868 | .     | S |
| Ti135 | O139  | 2.019 | .     | S |
| Ti135 | O142  | 1.945 | .     | S |
| Ti135 | O137  | 1.983 | .     | S |
| Ti135 | O305  | 2.030 | 1_565 | S |
| Ti135 | O143  | 1.916 | .     | S |
| Ti135 | O403  | 1.711 | 1_665 | S |
| Ti136 | O140  | 2.022 | .     | S |
| Ti136 | O141  | 2.114 | .     | S |
| Ti136 | O138  | 1.995 | .     | S |
| Ti136 | O144  | 1.953 | .     | S |
| O138  | Ti304 | 2.037 | 1_565 | S |
| O139  | H427  | 1.140 | .     | S |

|       |       |       |       |   |
|-------|-------|-------|-------|---|
| O140  | Ti169 | 1.848 | .     | S |
| O140  | Ti181 | 1.876 | .     | S |
| O142  | Ti301 | 2.053 | 1_565 | S |
| O144  | Ti181 | 2.062 | .     | S |
| Ti145 | O149  | 1.913 | .     | S |
| Ti145 | O154  | 1.953 | .     | S |
| Ti145 | O370  | 2.035 | .     | S |
| Ti146 | O150  | 1.947 | .     | S |
| Ti146 | O155  | 1.997 | .     | S |
| Ti146 | O153  | 2.072 | .     | S |
| Ti146 | O163  | 1.808 | .     | S |
| Ti146 | O177  | 2.067 | .     | S |
| Ti147 | O151  | 2.044 | .     | S |
| Ti147 | O154  | 2.074 | .     | S |
| Ti147 | O167  | 1.915 | .     | S |
| Ti147 | O149  | 2.084 | .     | S |
| Ti147 | O173  | 2.083 | .     | S |
| Ti148 | O152  | 1.984 | .     | S |
| Ti148 | O153  | 1.936 | .     | S |
| Ti148 | O168  | 1.910 | .     | S |
| Ti148 | O150  | 2.111 | .     | S |
| Ti148 | O366  | 2.121 | .     | S |
| O149  | Ti363 | 2.000 | .     | S |
| O150  | Ti172 | 2.102 | .     | S |
| O151  | Ti158 | 1.998 | .     | S |
| O153  | Ti362 | 2.089 | .     | S |
| O154  | Ti169 | 1.965 | .     | S |
| O155  | Ti159 | 1.962 | .     | S |
| O156  | Ti160 | 1.904 | .     | S |
| Ti157 | O161  | 2.119 | .     | S |
| Ti157 | O166  | 2.059 | .     | S |
| Ti157 | O382  | 2.029 | .     | S |
| Ti158 | O162  | 2.089 | .     | S |
| Ti158 | O167  | 2.056 | .     | S |
| Ti158 | O165  | 1.890 | .     | S |
| Ti158 | O163  | 1.801 | .     | S |
| Ti158 | O189  | 1.978 | .     | S |
| Ti159 | O163  | 1.911 | .     | S |
| Ti159 | O166  | 1.953 | .     | S |
| Ti159 | O161  | 2.012 | .     | S |
| Ti159 | O185  | 1.952 | .     | S |
| Ti159 | O167  | 1.901 | .     | S |
| Ti160 | O164  | 2.090 | .     | S |
| Ti160 | O165  | 2.006 | .     | S |
| Ti160 | O162  | 1.973 | .     | S |
| Ti160 | O378  | 1.968 | .     | S |
| Ti160 | O168  | 1.934 | .     | S |
| O161  | Ti375 | 2.023 | .     | S |
| O162  | Ti184 | 1.951 | .     | S |
| O165  | Ti374 | 1.895 | .     | S |
| O166  | Ti181 | 2.070 | .     | S |

|       |       |       |       |   |
|-------|-------|-------|-------|---|
| Ti169 | O173  | 1.946 | .     | S |
| Ti169 | O178  | 2.046 | .     | S |
| Ti170 | O174  | 2.001 | .     | S |
| Ti170 | O179  | 1.997 | .     | S |
| Ti170 | O177  | 2.083 | .     | S |
| Ti170 | O187  | 1.835 | .     | S |
| Ti170 | O345  | 2.090 | 1_565 | S |
| Ti171 | O175  | 2.035 | .     | S |
| Ti171 | O178  | 2.082 | .     | S |
| Ti171 | O191  | 1.854 | .     | S |
| Ti171 | O173  | 2.009 | .     | S |
| Ti171 | O341  | 1.996 | 1_565 | S |
| Ti172 | O176  | 1.998 | .     | S |
| Ti172 | O177  | 1.886 | .     | S |
| Ti172 | O192  | 1.921 | .     | S |
| Ti172 | O174  | 2.110 | .     | S |
| O174  | Ti340 | 2.121 | 1_565 | S |
| O175  | Ti182 | 1.951 | .     | S |
| O178  | Ti337 | 2.033 | 1_565 | S |
| O179  | Ti183 | 1.956 | .     | S |
| O180  | Ti184 | 1.913 | .     | S |
| Ti181 | O185  | 2.027 | .     | S |
| Ti181 | O190  | 2.046 | .     | S |
| Ti182 | O186  | 2.032 | .     | S |
| Ti182 | O191  | 1.996 | .     | S |
| Ti182 | O189  | 1.988 | .     | S |
| Ti182 | O187  | 1.850 | .     | S |
| Ti182 | O357  | 1.895 | 1_565 | S |
| Ti183 | O187  | 1.982 | .     | S |
| Ti183 | O190  | 1.928 | .     | S |
| Ti183 | O185  | 1.953 | .     | S |
| Ti183 | O353  | 2.025 | 1_565 | S |
| Ti183 | O191  | 1.815 | .     | S |
| Ti184 | O188  | 2.082 | .     | S |
| Ti184 | O189  | 2.099 | .     | S |
| Ti184 | O186  | 1.930 | .     | S |
| Ti184 | O192  | 1.998 | .     | S |
| O186  | Ti352 | 1.968 | 1_565 | S |
| O190  | Ti349 | 2.031 | 1_565 | S |
| Ti193 | O197  | 1.900 | 1_455 | S |
| Ti193 | O202  | 2.103 | 1_455 | S |
| Ti193 | O344  | 1.919 | .     | S |
| Ti193 | O34   | 2.093 | 1_445 | S |
| Ti194 | O198  | 2.006 | .     | S |
| Ti194 | O203  | 2.019 | .     | S |
| Ti194 | O201  | 2.010 | .     | S |
| Ti194 | O211  | 1.924 | .     | S |
| Ti194 | O199  | 1.941 | .     | S |
| Ti194 | O225  | 1.926 | .     | S |
| Ti195 | O199  | 1.946 | .     | S |
| Ti195 | O202  | 1.938 | .     | S |

|       |       |       |       |   |
|-------|-------|-------|-------|---|
| Ti195 | O197  | 2.030 | .     | S |
| Ti195 | O221  | 2.085 | .     | S |
| Ti195 | O203  | 1.828 | .     | S |
| Ti196 | O200  | 2.028 | .     | S |
| Ti196 | O201  | 2.109 | .     | S |
| Ti196 | O216  | 1.874 | .     | S |
| Ti196 | O198  | 1.877 | .     | S |
| Ti196 | O30   | 1.987 | 1_545 | S |
| Ti196 | O204  | 1.973 | .     | S |
| O197  | Ti193 | 1.900 | 1_655 | S |
| O197  | Ti27  | 2.046 | 1_545 | S |
| O198  | Ti220 | 1.917 | .     | S |
| O200  | Ti253 | 1.826 | .     | S |
| O200  | Ti241 | 1.872 | .     | S |
| O201  | Ti26  | 1.966 | 1_545 | S |
| O202  | Ti193 | 2.103 | 1_655 | S |
| O202  | Ti217 | 2.117 | 1_655 | S |
| O203  | Ti207 | 1.942 | .     | S |
| O204  | Ti241 | 2.076 | .     | S |
| Ti205 | O209  | 2.121 | 1_455 | S |
| Ti205 | O360  | 2.006 | .     | S |
| Ti205 | O214  | 1.958 | .     | S |
| Ti205 | O344  | 1.946 | .     | S |
| Ti205 | O356  | 2.028 | .     | S |
| Ti205 | O46   | 1.903 | 1_545 | S |
| Ti206 | O210  | 1.988 | .     | S |
| Ti206 | O215  | 1.997 | .     | S |
| Ti206 | O213  | 2.057 | .     | S |
| Ti206 | O211  | 1.834 | .     | S |
| Ti206 | O237  | 2.107 | .     | S |
| Ti207 | O211  | 2.035 | .     | S |
| Ti207 | O214  | 2.108 | 1_655 | S |
| Ti207 | O209  | 1.971 | .     | S |
| Ti207 | O233  | 1.895 | .     | S |
| Ti207 | O215  | 1.970 | .     | S |
| Ti208 | O212  | 2.021 | .     | S |
| Ti208 | O213  | 1.928 | .     | S |
| Ti208 | O210  | 2.123 | .     | S |
| Ti208 | O42   | 2.097 | 1_545 | S |
| Ti208 | O216  | 1.893 | .     | S |
| O209  | Ti205 | 2.121 | 1_655 | S |
| O209  | Ti39  | 2.008 | 1_545 | S |
| O210  | Ti232 | 2.138 | .     | S |
| O212  | Ti253 | 1.909 | .     | S |
| O213  | Ti38  | 2.037 | 1_545 | S |
| O214  | Ti207 | 2.108 | 1_455 | S |
| O214  | Ti229 | 1.996 | .     | S |
| O216  | Ti253 | 1.934 | .     | S |
| Ti217 | O221  | 1.895 | 1_455 | S |
| Ti217 | O226  | 2.111 | 1_455 | S |
| Ti217 | O368  | 1.950 | .     | S |

|       |       |       |       |   |
|-------|-------|-------|-------|---|
| Ti217 | O202  | 2.117 | 1_455 | S |
| Ti218 | O222  | 2.097 | .     | S |
| Ti218 | O227  | 1.994 | .     | S |
| Ti218 | O225  | 1.884 | .     | S |
| Ti218 | O235  | 1.898 | .     | S |
| Ti218 | O223  | 1.956 | .     | S |
| Ti219 | O223  | 2.020 | .     | S |
| Ti219 | O226  | 1.978 | .     | S |
| Ti219 | O221  | 2.103 | .     | S |
| Ti219 | O227  | 1.804 | .     | S |
| Ti220 | O224  | 2.046 | .     | S |
| Ti220 | O225  | 2.002 | .     | S |
| Ti220 | O240  | 1.904 | .     | S |
| Ti220 | O222  | 2.033 | .     | S |
| Ti220 | O228  | 1.973 | .     | S |
| O221  | Ti217 | 1.895 | 1_655 | S |
| O224  | Ti277 | 1.883 | .     | S |
| O224  | Ti265 | 1.935 | .     | S |
| O226  | Ti217 | 2.111 | 1_655 | S |
| O226  | Ti1   | 2.093 | 1_655 | S |
| O227  | Ti231 | 1.900 | .     | S |
| O228  | Ti265 | 2.011 | .     | S |
| Ti229 | O233  | 2.033 | 1_455 | S |
| Ti229 | O384  | 2.003 | .     | S |
| Ti229 | O238  | 1.950 | .     | S |
| Ti229 | O368  | 1.952 | .     | S |
| Ti229 | O380  | 1.967 | .     | S |
| Ti230 | O234  | 1.939 | .     | S |
| Ti230 | O239  | 2.026 | .     | S |
| Ti230 | O237  | 2.096 | .     | S |
| Ti230 | O235  | 1.795 | .     | S |
| Ti231 | O235  | 1.996 | .     | S |
| Ti231 | O238  | 2.041 | 1_655 | S |
| Ti231 | O233  | 1.930 | .     | S |
| Ti231 | O239  | 1.957 | .     | S |
| Ti232 | O236  | 2.004 | .     | S |
| Ti232 | O237  | 1.908 | .     | S |
| Ti232 | O234  | 2.114 | .     | S |
| Ti232 | O240  | 1.941 | .     | S |
| O233  | Ti229 | 2.033 | 1_655 | S |
| O236  | Ti277 | 1.918 | .     | S |
| O238  | Ti231 | 2.041 | 1_455 | S |
| O240  | Ti277 | 1.972 | .     | S |
| Ti241 | O245  | 2.097 | .     | S |
| Ti241 | O250  | 2.034 | .     | S |
| Ti241 | O82   | 2.012 | 1_545 | S |
| Ti242 | O246  | 2.038 | .     | S |
| Ti242 | O251  | 2.062 | .     | S |
| Ti242 | O249  | 2.036 | .     | S |
| Ti242 | O259  | 1.978 | .     | S |
| Ti242 | O247  | 1.857 | .     | S |

|       |       |       |       |   |
|-------|-------|-------|-------|---|
| Ti242 | O273  | 1.913 | .     | S |
| Ti243 | O247  | 1.997 | .     | S |
| Ti243 | O250  | 1.964 | .     | S |
| Ti243 | O263  | 1.960 | .     | S |
| Ti243 | O245  | 2.064 | .     | S |
| Ti243 | O269  | 1.970 | .     | S |
| Ti243 | O251  | 1.885 | .     | S |
| Ti244 | O248  | 2.078 | .     | S |
| Ti244 | O249  | 2.099 | .     | S |
| Ti244 | O264  | 1.903 | .     | S |
| Ti244 | O246  | 1.932 | .     | S |
| Ti244 | O78   | 1.939 | 1_545 | S |
| Ti244 | O252  | 1.962 | .     | S |
| O245  | Ti75  | 2.060 | 1_545 | S |
| O246  | Ti268 | 1.984 | .     | S |
| O247  | Ti254 | 1.855 | .     | S |
| O248  | Ti289 | 1.992 | .     | S |
| O249  | Ti74  | 2.014 | 1_545 | S |
| O250  | Ti265 | 2.103 | .     | S |
| O251  | Ti255 | 1.927 | .     | S |
| O252  | Ti289 | 1.966 | .     | S |
| O252  | Ti256 | 1.889 | .     | S |
| Ti253 | O257  | 1.903 | .     | S |
| Ti253 | O262  | 1.966 | .     | S |
| Ti253 | O94   | 2.048 | 1_545 | S |
| Ti254 | O258  | 2.000 | .     | S |
| Ti254 | O263  | 1.984 | .     | S |
| Ti254 | O261  | 2.056 | .     | S |
| Ti254 | O285  | 2.125 | .     | S |
| Ti255 | O259  | 2.011 | .     | S |
| Ti255 | O262  | 2.065 | .     | S |
| Ti255 | O257  | 2.054 | .     | S |
| Ti255 | O281  | 2.099 | .     | S |
| Ti256 | O260  | 2.024 | .     | S |
| Ti256 | O261  | 1.918 | .     | S |
| Ti256 | O258  | 2.111 | .     | S |
| Ti256 | O90   | 2.104 | 1_545 | S |
| O257  | Ti87  | 2.003 | 1_545 | S |
| O258  | Ti280 | 2.117 | .     | S |
| O260  | Ti289 | 1.929 | .     | S |
| O260  | Ti301 | 1.961 | .     | S |
| O261  | Ti86  | 2.035 | 1_545 | S |
| O262  | Ti277 | 1.971 | .     | S |
| Ti265 | O269  | 2.058 | .     | S |
| Ti265 | O274  | 2.063 | .     | S |
| Ti266 | O270  | 2.087 | .     | S |
| Ti266 | O275  | 2.039 | .     | S |
| Ti266 | O273  | 1.891 | .     | S |
| Ti266 | O283  | 1.979 | .     | S |
| Ti266 | O271  | 1.819 | .     | S |
| Ti267 | O271  | 1.940 | .     | S |

|       |       |       |       |   |
|-------|-------|-------|-------|---|
| Ti267 | O274  | 1.914 | .     | S |
| Ti267 | O287  | 1.952 | .     | S |
| Ti267 | O269  | 1.957 | .     | S |
| Ti267 | O275  | 1.828 | .     | S |
| Ti268 | O272  | 2.105 | .     | S |
| Ti268 | O273  | 2.027 | .     | S |
| Ti268 | O288  | 1.917 | .     | S |
| Ti268 | O270  | 2.002 | .     | S |
| Ti268 | O276  | 1.979 | .     | S |
| O271  | Ti278 | 1.808 | .     | S |
| O272  | Ti313 | 1.976 | .     | S |
| O275  | Ti279 | 1.858 | .     | S |
| O276  | Ti313 | 2.020 | .     | S |
| O276  | Ti280 | 1.933 | .     | S |
| Ti277 | O281  | 1.951 | .     | S |
| Ti277 | O286  | 2.049 | .     | S |
| Ti278 | O282  | 1.940 | .     | S |
| Ti278 | O287  | 1.997 | .     | S |
| Ti278 | O285  | 2.111 | .     | S |
| Ti279 | O283  | 2.047 | .     | S |
| Ti279 | O286  | 2.087 | .     | S |
| Ti279 | O281  | 2.029 | .     | S |
| Ti280 | O284  | 1.964 | .     | S |
| Ti280 | O285  | 1.889 | .     | S |
| Ti280 | O282  | 2.106 | .     | S |
| O284  | Ti313 | 1.914 | .     | S |
| O284  | Ti325 | 1.885 | .     | S |
| Ti289 | O293  | 2.014 | .     | S |
| Ti289 | O298  | 1.935 | .     | S |
| Ti289 | O130  | 1.991 | 1_545 | S |
| Ti290 | O294  | 1.992 | .     | S |
| Ti290 | O299  | 2.017 | .     | S |
| Ti290 | O297  | 2.113 | .     | S |
| Ti290 | O295  | 1.836 | .     | S |
| Ti290 | O321  | 2.058 | .     | S |
| Ti291 | O295  | 2.021 | .     | S |
| Ti291 | O298  | 2.033 | .     | S |
| Ti291 | O311  | 1.906 | .     | S |
| Ti291 | O293  | 1.947 | .     | S |
| Ti291 | O317  | 2.022 | .     | S |
| Ti291 | O299  | 1.956 | .     | S |
| Ti292 | O296  | 1.997 | .     | S |
| Ti292 | O297  | 1.907 | .     | S |
| Ti292 | O294  | 2.137 | .     | S |
| Ti292 | O126  | 2.110 | 1_545 | S |
| Ti292 | O300  | 1.938 | .     | S |
| O293  | Ti123 | 1.894 | 1_545 | S |
| O294  | Ti316 | 2.121 | .     | S |
| O295  | Ti302 | 1.918 | .     | S |
| O296  | Ti337 | 1.914 | .     | S |
| O297  | Ti122 | 2.092 | 1_545 | S |

|       |       |       |       |   |
|-------|-------|-------|-------|---|
| O298  | Ti313 | 1.902 | .     | S |
| O300  | Ti337 | 1.969 | .     | S |
| O300  | Ti304 | 1.905 | .     | S |
| Ti301 | O305  | 1.977 | .     | S |
| Ti301 | O310  | 2.073 | .     | S |
| Ti301 | O142  | 2.053 | 1_545 | S |
| Ti302 | O306  | 1.997 | .     | S |
| Ti302 | O311  | 2.006 | .     | S |
| Ti302 | O309  | 1.902 | .     | S |
| Ti302 | O307  | 1.930 | .     | S |
| Ti302 | O333  | 2.003 | .     | S |
| Ti303 | O307  | 1.941 | .     | S |
| Ti303 | O310  | 1.967 | .     | S |
| Ti303 | O305  | 2.032 | .     | S |
| Ti303 | O329  | 1.992 | .     | S |
| Ti303 | O311  | 1.835 | .     | S |
| Ti304 | O308  | 2.042 | .     | S |
| Ti304 | O309  | 2.009 | .     | S |
| Ti304 | O306  | 1.923 | .     | S |
| Ti304 | O138  | 2.037 | 1_545 | S |
| Ti304 | O312  | 1.972 | .     | S |
| O305  | Ti135 | 2.030 | 1_545 | S |
| O306  | Ti328 | 1.876 | .     | S |
| O308  | Ti337 | 1.871 | .     | S |
| O308  | Ti349 | 1.943 | .     | S |
| O309  | Ti134 | 1.898 | 1_545 | S |
| O310  | Ti325 | 2.033 | .     | S |
| O312  | Ti349 | 2.027 | .     | S |
| Ti313 | O317  | 2.120 | .     | S |
| Ti313 | O322  | 1.958 | .     | S |
| Ti314 | O318  | 1.925 | .     | S |
| Ti314 | O323  | 1.987 | .     | S |
| Ti314 | O321  | 2.029 | .     | S |
| Ti314 | O319  | 1.797 | .     | S |
| Ti315 | O319  | 1.995 | .     | S |
| Ti315 | O322  | 2.096 | .     | S |
| Ti315 | O335  | 1.990 | .     | S |
| Ti315 | O317  | 1.974 | .     | S |
| Ti315 | O323  | 1.962 | .     | S |
| Ti316 | O320  | 2.023 | .     | S |
| Ti316 | O321  | 1.926 | .     | S |
| Ti316 | O318  | 2.104 | .     | S |
| Ti316 | O324  | 1.892 | .     | S |
| O319  | Ti326 | 1.870 | .     | S |
| O320  | Ti361 | 1.913 | .     | S |
| O324  | Ti361 | 1.941 | .     | S |
| O324  | Ti328 | 1.875 | .     | S |
| Ti325 | O329  | 1.885 | .     | S |
| Ti325 | O334  | 2.027 | .     | S |
| Ti326 | O330  | 2.097 | .     | S |
| Ti326 | O335  | 2.045 | .     | S |



|       |       |       |       |   |
|-------|-------|-------|-------|---|
| Ti326 | O333  | 1.968 | .     | S |
| Ti326 | O331  | 1.930 | .     | S |
| Ti327 | O331  | 1.992 | .     | S |
| Ti327 | O334  | 1.973 | .     | S |
| Ti327 | O329  | 2.010 | .     | S |
| Ti327 | O335  | 1.849 | .     | S |
| Ti328 | O332  | 2.018 | .     | S |
| Ti328 | O333  | 2.112 | .     | S |
| Ti328 | O330  | 1.979 | .     | S |
| Ti328 | O336  | 1.955 | .     | S |
| O332  | Ti361 | 1.849 | .     | S |
| O332  | Ti373 | 1.877 | .     | S |
| O336  | Ti373 | 2.063 | .     | S |
| Ti337 | O341  | 1.913 | .     | S |
| Ti337 | O346  | 1.958 | .     | S |
| Ti337 | O178  | 2.033 | 1_545 | S |
| Ti338 | O342  | 1.947 | .     | S |
| Ti338 | O347  | 1.997 | .     | S |
| Ti338 | O345  | 2.072 | .     | S |
| Ti338 | O355  | 1.808 | .     | S |
| Ti338 | O369  | 2.067 | .     | S |
| Ti339 | O343  | 2.044 | .     | S |
| Ti339 | O346  | 2.072 | .     | S |
| Ti339 | O359  | 1.915 | .     | S |
| Ti339 | O341  | 2.085 | .     | S |
| Ti339 | O365  | 2.085 | .     | S |
| Ti340 | O344  | 1.984 | .     | S |
| Ti340 | O345  | 1.936 | .     | S |
| Ti340 | O360  | 1.910 | .     | S |
| Ti340 | O342  | 2.111 | .     | S |
| Ti340 | O174  | 2.121 | 1_545 | S |
| O341  | Ti171 | 1.996 | 1_545 | S |
| O342  | Ti364 | 2.102 | .     | S |
| O343  | Ti350 | 1.998 | .     | S |
| O345  | Ti170 | 2.090 | 1_545 | S |
| O346  | Ti361 | 1.962 | .     | S |
| O347  | Ti351 | 1.962 | .     | S |
| O348  | Ti352 | 1.904 | .     | S |
| Ti349 | O353  | 2.119 | .     | S |
| Ti349 | O358  | 2.059 | .     | S |
| Ti349 | O190  | 2.031 | 1_545 | S |
| Ti350 | O354  | 2.089 | .     | S |
| Ti350 | O359  | 2.056 | .     | S |
| Ti350 | O357  | 1.889 | .     | S |
| Ti350 | O355  | 1.801 | .     | S |
| Ti350 | O381  | 1.979 | .     | S |
| Ti351 | O355  | 1.911 | .     | S |
| Ti351 | O358  | 1.954 | .     | S |
| Ti351 | O353  | 2.013 | .     | S |
| Ti351 | O377  | 1.952 | .     | S |
| Ti351 | O359  | 1.901 | .     | S |

|       |       |       |       |   |
|-------|-------|-------|-------|---|
| Ti352 | O356  | 2.090 | .     | S |
| Ti352 | O357  | 2.007 | .     | S |
| Ti352 | O354  | 1.972 | .     | S |
| Ti352 | O186  | 1.968 | 1_545 | S |
| Ti352 | O360  | 1.933 | .     | S |
| O353  | Ti183 | 2.025 | 1_545 | S |
| O354  | Ti376 | 1.951 | .     | S |
| O357  | Ti182 | 1.895 | 1_545 | S |
| O358  | Ti373 | 2.069 | .     | S |
| Ti361 | O365  | 1.945 | .     | S |
| Ti361 | O370  | 2.048 | .     | S |
| Ti362 | O366  | 2.001 | .     | S |
| Ti362 | O371  | 1.996 | .     | S |
| Ti362 | O369  | 2.082 | .     | S |
| Ti362 | O379  | 1.836 | .     | S |
| Ti363 | O367  | 2.033 | .     | S |
| Ti363 | O370  | 2.079 | .     | S |
| Ti363 | O383  | 1.856 | .     | S |
| Ti363 | O365  | 2.013 | .     | S |
| Ti364 | O368  | 1.998 | .     | S |
| Ti364 | O369  | 1.886 | .     | S |
| Ti364 | O384  | 1.921 | .     | S |
| Ti364 | O366  | 2.110 | .     | S |
| O367  | Ti374 | 1.951 | .     | S |
| O371  | Ti375 | 1.956 | .     | S |
| O372  | Ti376 | 1.914 | .     | S |
| Ti373 | O377  | 2.026 | .     | S |
| Ti373 | O382  | 2.044 | .     | S |
| Ti374 | O378  | 2.032 | .     | S |
| Ti374 | O383  | 1.995 | .     | S |
| Ti374 | O381  | 1.988 | .     | S |
| Ti374 | O379  | 1.850 | .     | S |
| Ti375 | O379  | 1.982 | .     | S |
| Ti375 | O382  | 1.928 | .     | S |
| Ti375 | O377  | 1.951 | .     | S |
| Ti375 | O383  | 1.817 | .     | S |
| Ti376 | O380  | 2.082 | .     | S |
| Ti376 | O381  | 2.099 | .     | S |
| Ti376 | O378  | 1.931 | .     | S |
| Ti376 | O384  | 1.998 | .     | S |
| C385  | C386  | 1.217 | .     | T |
| C385  | C425  | 1.332 | 1_445 | A |
| C386  | C387  | 1.329 | .     | D |
| C387  | C388  | 1.215 | .     | T |
| C388  | C389  | 1.329 | .     | D |
| C389  | C390  | 1.217 | .     | T |
| C390  | C391  | 1.357 | .     | A |
| C391  | C392  | 1.322 | .     | D |
| C391  | S393  | 1.800 | .     | S |
| C392  | C394  | 1.376 | .     | A |
| C392  | H395  | 1.083 | .     | S |

|      |       |       |       |   |
|------|-------|-------|-------|---|
| S393 | C396  | 1.811 | .     | S |
| C394 | C396  | 1.332 | .     | D |
| C394 | H397  | 1.083 | .     | S |
| C396 | C398  | 1.391 | .     | A |
| C398 | H399  | 1.083 | .     | S |
| C398 | C400  | 1.351 | .     | D |
| C400 | C401  | 1.364 | .     | A |
| C400 | P402  | 1.842 | .     | S |
| C401 | N405  | 1.163 | .     | T |
| P402 | O424  | 1.535 | 1_445 | D |
| P402 | O404  | 1.725 | .     | S |
| P402 | O403  | 1.742 | .     | S |
| O403 | Ti135 | 1.711 | 1_445 | S |
| O404 | Ti111 | 1.681 | 1_445 | S |
| C406 | C407  | 1.324 | .     | D |
| C406 | S408  | 1.800 | .     | S |
| C406 | C426  | 1.354 | 1_445 | A |
| C407 | C409  | 1.378 | .     | A |
| C407 | H410  | 1.083 | .     | S |
| S408 | C411  | 1.807 | .     | S |
| C409 | C411  | 1.328 | .     | D |
| C409 | H412  | 1.082 | .     | S |
| C411 | N421  | 1.357 | .     | A |
| H413 | N421  | 1.043 | .     | S |
| C414 | C415  | 1.322 | .     | D |
| C414 | N421  | 1.428 | .     | S |
| C414 | N422  | 1.414 | .     | S |
| C415 | C416  | 1.385 | .     | A |
| C415 | H417  | 1.081 | .     | S |
| C416 | C418  | 1.329 | .     | D |
| C416 | H419  | 1.082 | .     | S |
| C418 | H420  | 1.084 | .     | S |
| C418 | N422  | 1.346 | .     | A |
| N422 | H423  | 1.042 | .     | S |
| O424 | P402  | 1.535 | 1_665 | D |
| C425 | C385  | 1.332 | 1_665 | A |
| C425 | C426  | 1.213 | .     | T |
| C426 | C406  | 1.354 | 1_665 | A |

data\_TiO2@PY3PO3

|                                |                    |
|--------------------------------|--------------------|
| _audit_creation_method         | 'Materials Studio' |
| _symmetry_space_group_name_H-M | 'P1'               |
| _symmetry_Int_Tables_number    | 1                  |
| _symmetry_cell_setting         | triclinic          |
| loop_                          |                    |
| _symmetry_equiv_pos_as_xyz     |                    |
| x,y,z                          |                    |
| _cell_length_a                 | 38.6882            |
| _cell_length_b                 | 15.1040            |
| _cell_length_c                 | 47.5200            |
| _cell_angle_alpha              | 90.0000            |

\_cell\_angle\_beta 90.0000  
\_cell\_angle\_gamma 90.0000

loop\_

\_atom\_site\_label

\_atom\_site\_type\_symbol

\_atom\_site\_fract\_x

\_atom\_site\_fract\_y

\_atom\_site\_fract\_z

\_atom\_site\_U\_iso\_or\_equiv

\_atom\_site\_adp\_type

\_atom\_site\_occupancy

|      |    |          |         |         |         |      |      |
|------|----|----------|---------|---------|---------|------|------|
| Ti1  | Ti | -0.00691 | 0.50279 | 0.83874 | 0.00000 | Uiso | 1.00 |
| Ti2  | Ti | 0.89089  | 0.62857 | 0.88920 | 0.00000 | Uiso | 1.00 |
| Ti3  | Ti | 0.93664  | 0.62188 | 0.84638 | 0.00000 | Uiso | 1.00 |
| Ti4  | Ti | 0.83361  | 0.50400 | 0.90226 | 0.00000 | Uiso | 1.00 |
| O5   | O  | 0.95200  | 0.50143 | 0.86062 | 0.00000 | Uiso | 1.00 |
| O6   | O  | 0.83916  | 0.62269 | 0.89150 | 0.00000 | Uiso | 1.00 |
| O7   | O  | 0.88671  | 0.60873 | 0.84899 | 0.00000 | Uiso | 1.00 |
| O8   | O  | 0.78412  | 0.53581 | 0.91199 | 0.00000 | Uiso | 1.00 |
| O9   | O  | 0.88785  | 0.49873 | 0.89815 | 0.00000 | Uiso | 1.00 |
| O10  | O  | 0.97722  | 0.62576 | 0.82251 | 0.00000 | Uiso | 1.00 |
| O11  | O  | 0.94167  | 0.65327 | 0.88331 | 0.00000 | Uiso | 1.00 |
| O12  | O  | 0.80880  | 0.47929 | 0.86685 | 0.00000 | Uiso | 1.00 |
| Ti13 | Ti | 0.02091  | 0.49636 | 0.90685 | 0.00000 | Uiso | 1.00 |
| Ti14 | Ti | 0.91303  | 0.62057 | 0.96186 | 0.00000 | Uiso | 1.00 |
| Ti15 | Ti | 0.96446  | 0.62842 | 0.91886 | 0.00000 | Uiso | 1.00 |
| Ti16 | Ti | 0.85608  | 0.49885 | 0.97563 | 0.00000 | Uiso | 1.00 |
| O17  | O  | 0.96628  | 0.50087 | 0.91027 | 0.00000 | Uiso | 1.00 |
| O18  | O  | 0.87411  | 0.62462 | 0.98915 | 0.00000 | Uiso | 1.00 |
| O19  | O  | 0.91317  | 0.65229 | 0.92461 | 0.00000 | Uiso | 1.00 |
| O20  | O  | 0.80617  | 0.47299 | 0.98508 | 0.00000 | Uiso | 1.00 |
| O21  | O  | 0.89449  | 0.49868 | 0.94979 | 0.00000 | Uiso | 1.00 |
| O22  | O  | 0.01874  | 0.62300 | 0.91543 | 0.00000 | Uiso | 1.00 |
| O23  | O  | 0.96435  | 0.60765 | 0.95978 | 0.00000 | Uiso | 1.00 |
| O24  | O  | 0.83620  | 0.53098 | 0.94069 | 0.00000 | Uiso | 1.00 |
| Ti25 | Ti | -0.00848 | 0.75017 | 0.83939 | 0.00000 | Uiso | 1.00 |
| Ti26 | Ti | 0.88882  | 0.86972 | 0.89267 | 0.00000 | Uiso | 1.00 |
| Ti27 | Ti | 0.93453  | 0.88171 | 0.84636 | 0.00000 | Uiso | 1.00 |
| Ti28 | Ti | 0.82942  | 0.74484 | 0.89912 | 0.00000 | Uiso | 1.00 |
| O29  | O  | 0.94810  | 0.75183 | 0.85784 | 0.00000 | Uiso | 1.00 |
| O30  | O  | 0.83818  | 0.87435 | 0.90836 | 0.00000 | Uiso | 1.00 |
| O31  | O  | 0.88308  | 0.89355 | 0.85249 | 0.00000 | Uiso | 1.00 |
| O32  | O  | 0.77967  | 0.71858 | 0.91108 | 0.00000 | Uiso | 1.00 |
| O33  | O  | 0.87794  | 0.75081 | 0.88461 | 0.00000 | Uiso | 1.00 |
| O34  | O  | 0.97806  | 0.87732 | 0.82457 | 0.00000 | Uiso | 1.00 |
| O35  | O  | 0.93780  | 0.84456 | 0.88234 | 0.00000 | Uiso | 1.00 |
| O36  | O  | 0.80834  | 0.76221 | 0.86170 | 0.00000 | Uiso | 1.00 |
| Ti37 | Ti | 0.02523  | 0.75266 | 0.90925 | 0.00000 | Uiso | 1.00 |
| Ti38 | Ti | 0.91559  | 0.88115 | 0.96193 | 0.00000 | Uiso | 1.00 |
| Ti39 | Ti | 0.96230  | 0.86958 | 0.91608 | 0.00000 | Uiso | 1.00 |
| Ti40 | Ti | 0.85716  | 0.75110 | 0.97442 | 0.00000 | Uiso | 1.00 |

|      |    |         |         |         |         |      |      |
|------|----|---------|---------|---------|---------|------|------|
| O41  | O  | 0.97593 | 0.74927 | 0.92403 | 0.00000 | Uiso | 1.00 |
| O42  | O  | 0.87646 | 0.87559 | 0.98736 | 0.00000 | Uiso | 1.00 |
| O43  | O  | 0.91332 | 0.84298 | 0.92622 | 0.00000 | Uiso | 1.00 |
| O44  | O  | 0.80805 | 0.77830 | 0.98472 | 0.00000 | Uiso | 1.00 |
| O45  | O  | 0.89881 | 0.75224 | 0.95293 | 0.00000 | Uiso | 1.00 |
| O46  | O  | 0.01159 | 0.87410 | 0.90085 | 0.00000 | Uiso | 1.00 |
| O47  | O  | 0.96730 | 0.89304 | 0.95637 | 0.00000 | Uiso | 1.00 |
| O48  | O  | 0.83659 | 0.72371 | 0.93820 | 0.00000 | Uiso | 1.00 |
| Ti49 | Ti | 0.75848 | 0.49744 | 0.88088 | 0.00000 | Uiso | 1.00 |
| Ti50 | Ti | 0.65720 | 0.62760 | 0.92694 | 0.00000 | Uiso | 1.00 |
| Ti51 | Ti | 0.69814 | 0.62363 | 0.87671 | 0.00000 | Uiso | 1.00 |
| Ti52 | Ti | 0.59908 | 0.49910 | 0.93159 | 0.00000 | Uiso | 1.00 |
| O53  | O  | 0.70559 | 0.49535 | 0.89047 | 0.00000 | Uiso | 1.00 |
| O54  | O  | 0.60770 | 0.62120 | 0.94129 | 0.00000 | Uiso | 1.00 |
| O55  | O  | 0.65029 | 0.65378 | 0.88920 | 0.00000 | Uiso | 1.00 |
| O56  | O  | 0.54885 | 0.50839 | 0.94656 | 0.00000 | Uiso | 1.00 |
| O57  | O  | 0.64963 | 0.49907 | 0.91559 | 0.00000 | Uiso | 1.00 |
| O58  | O  | 0.74598 | 0.61562 | 0.86303 | 0.00000 | Uiso | 1.00 |
| O59  | O  | 0.70717 | 0.65417 | 0.91447 | 0.00000 | Uiso | 1.00 |
| O60  | O  | 0.57082 | 0.52615 | 0.89837 | 0.00000 | Uiso | 1.00 |
| Ti61 | Ti | 0.78840 | 0.50376 | 0.94889 | 0.00000 | Uiso | 1.00 |
| Ti62 | Ti | 0.62940 | 0.61449 | 0.85632 | 0.00000 | Uiso | 1.00 |
| Ti63 | Ti | 0.72771 | 0.62667 | 0.95037 | 0.00000 | Uiso | 1.00 |
| Ti64 | Ti | 0.56956 | 0.49359 | 0.86010 | 0.00000 | Uiso | 1.00 |
| O65  | O  | 0.74050 | 0.49671 | 0.95770 | 0.00000 | Uiso | 1.00 |
| O66  | O  | 0.58041 | 0.61933 | 0.84249 | 0.00000 | Uiso | 1.00 |
| O67  | O  | 0.67905 | 0.60840 | 0.96405 | 0.00000 | Uiso | 1.00 |
| O68  | O  | 0.51996 | 0.46612 | 0.87092 | 0.00000 | Uiso | 1.00 |
| O69  | O  | 0.61638 | 0.49374 | 0.87341 | 0.00000 | Uiso | 1.00 |
| O70  | O  | 0.77954 | 0.62635 | 0.96079 | 0.00000 | Uiso | 1.00 |
| O71  | O  | 0.67635 | 0.59441 | 0.84060 | 0.00000 | Uiso | 1.00 |
| O72  | O  | 0.61956 | 0.47108 | 0.96690 | 0.00000 | Uiso | 1.00 |
| Ti73 | Ti | 0.75933 | 0.74540 | 0.87484 | 0.00000 | Uiso | 1.00 |
| Ti74 | Ti | 0.65414 | 0.86839 | 0.92309 | 0.00000 | Uiso | 1.00 |
| Ti75 | Ti | 0.69873 | 0.86766 | 0.87633 | 0.00000 | Uiso | 1.00 |
| Ti76 | Ti | 0.59502 | 0.74741 | 0.93628 | 0.00000 | Uiso | 1.00 |
| O77  | O  | 0.70769 | 0.74574 | 0.86439 | 0.00000 | Uiso | 1.00 |
| O78  | O  | 0.60023 | 0.87319 | 0.92364 | 0.00000 | Uiso | 1.00 |
| O79  | O  | 0.65180 | 0.83520 | 0.88637 | 0.00000 | Uiso | 1.00 |
| O80  | O  | 0.54197 | 0.73532 | 0.94518 | 0.00000 | Uiso | 1.00 |
| O81  | O  | 0.64734 | 0.74955 | 0.93427 | 0.00000 | Uiso | 1.00 |
| O82  | O  | 0.74668 | 0.87557 | 0.86664 | 0.00000 | Uiso | 1.00 |
| O83  | O  | 0.70377 | 0.83528 | 0.91317 | 0.00000 | Uiso | 1.00 |
| O84  | O  | 0.57087 | 0.72007 | 0.90064 | 0.00000 | Uiso | 1.00 |
| Ti85 | Ti | 0.78834 | 0.74924 | 0.94885 | 0.00000 | Uiso | 1.00 |
| Ti86 | Ti | 0.63112 | 0.87864 | 0.85512 | 0.00000 | Uiso | 1.00 |
| Ti87 | Ti | 0.72918 | 0.87476 | 0.94391 | 0.00000 | Uiso | 1.00 |
| Ti88 | Ti | 0.57247 | 0.74595 | 0.86088 | 0.00000 | Uiso | 1.00 |
| O89  | O  | 0.74064 | 0.75662 | 0.96195 | 0.00000 | Uiso | 1.00 |
| O90  | O  | 0.58309 | 0.87137 | 0.84325 | 0.00000 | Uiso | 1.00 |
| O91  | O  | 0.67984 | 0.89462 | 0.95812 | 0.00000 | Uiso | 1.00 |

|       |    |         |         |         |         |      |      |
|-------|----|---------|---------|---------|---------|------|------|
| O92   | O  | 0.52474 | 0.78110 | 0.87046 | 0.00000 | Uiso | 1.00 |
| O93   | O  | 0.62049 | 0.74807 | 0.86846 | 0.00000 | Uiso | 1.00 |
| O94   | O  | 0.78199 | 0.87655 | 0.93492 | 0.00000 | Uiso | 1.00 |
| O95   | O  | 0.67865 | 0.89901 | 0.83993 | 0.00000 | Uiso | 1.00 |
| O96   | O  | 0.60778 | 0.77571 | 0.97420 | 0.00000 | Uiso | 1.00 |
| Ti97  | Ti | 0.52314 | 0.50164 | 0.91029 | 0.00000 | Uiso | 1.00 |
| Ti98  | Ti | 0.41366 | 0.63180 | 0.96105 | 0.00000 | Uiso | 1.00 |
| Ti99  | Ti | 0.46093 | 0.61925 | 0.91517 | 0.00000 | Uiso | 1.00 |
| Ti100 | Ti | 0.35722 | 0.50088 | 0.97424 | 0.00000 | Uiso | 1.00 |
| O101  | O  | 0.47445 | 0.49915 | 0.92524 | 0.00000 | Uiso | 1.00 |
| O102  | O  | 0.37488 | 0.62709 | 0.98867 | 0.00000 | Uiso | 1.00 |
| O103  | O  | 0.41098 | 0.59710 | 0.92429 | 0.00000 | Uiso | 1.00 |
| O104  | O  | 0.30825 | 0.47476 | 0.98471 | 0.00000 | Uiso | 1.00 |
| O105  | O  | 0.39879 | 0.49961 | 0.95263 | 0.00000 | Uiso | 1.00 |
| O106  | O  | 0.51051 | 0.62293 | 0.90127 | 0.00000 | Uiso | 1.00 |
| O107  | O  | 0.46519 | 0.64615 | 0.95533 | 0.00000 | Uiso | 1.00 |
| O108  | O  | 0.33692 | 0.52699 | 0.93793 | 0.00000 | Uiso | 1.00 |
| Ti109 | Ti | 0.48930 | 0.48935 | 0.83873 | 0.00000 | Uiso | 1.00 |
| Ti110 | Ti | 0.39101 | 0.61535 | 0.88823 | 0.00000 | Uiso | 1.00 |
| Ti111 | Ti | 0.43572 | 0.62407 | 0.84197 | 0.00000 | Uiso | 1.00 |
| Ti112 | Ti | 0.32957 | 0.50132 | 0.89929 | 0.00000 | Uiso | 1.00 |
| O113  | O  | 0.43869 | 0.49172 | 0.83411 | 0.00000 | Uiso | 1.00 |
| O114  | O  | 0.33941 | 0.62366 | 0.89129 | 0.00000 | Uiso | 1.00 |
| O115  | O  | 0.38578 | 0.62436 | 0.84959 | 0.00000 | Uiso | 1.00 |
| O116  | O  | 0.27985 | 0.52774 | 0.91085 | 0.00000 | Uiso | 1.00 |
| O117  | O  | 0.37813 | 0.49442 | 0.88507 | 0.00000 | Uiso | 1.00 |
| O118  | O  | 0.48491 | 0.62301 | 0.83266 | 0.00000 | Uiso | 1.00 |
| O119  | O  | 0.44101 | 0.58849 | 0.87971 | 0.00000 | Uiso | 1.00 |
| O120  | O  | 0.30779 | 0.48018 | 0.86237 | 0.00000 | Uiso | 1.00 |
| Ti121 | Ti | 0.52047 | 0.74512 | 0.90765 | 0.00000 | Uiso | 1.00 |
| Ti122 | Ti | 0.41431 | 0.86977 | 0.96089 | 0.00000 | Uiso | 1.00 |
| Ti123 | Ti | 0.46453 | 0.87746 | 0.91744 | 0.00000 | Uiso | 1.00 |
| Ti124 | Ti | 0.35584 | 0.75125 | 0.97503 | 0.00000 | Uiso | 1.00 |
| O125  | O  | 0.46585 | 0.75021 | 0.90767 | 0.00000 | Uiso | 1.00 |
| O126  | O  | 0.37587 | 0.87495 | 0.98664 | 0.00000 | Uiso | 1.00 |
| O127  | O  | 0.41510 | 0.90331 | 0.92461 | 0.00000 | Uiso | 1.00 |
| O128  | O  | 0.30568 | 0.77412 | 0.98449 | 0.00000 | Uiso | 1.00 |
| O129  | O  | 0.39370 | 0.75219 | 0.94866 | 0.00000 | Uiso | 1.00 |
| O130  | O  | 0.51847 | 0.87225 | 0.91504 | 0.00000 | Uiso | 1.00 |
| O131  | O  | 0.46527 | 0.85362 | 0.95802 | 0.00000 | Uiso | 1.00 |
| O132  | O  | 0.33633 | 0.71748 | 0.94014 | 0.00000 | Uiso | 1.00 |
| Ti133 | Ti | 0.48948 | 0.74948 | 0.84581 | 0.00000 | Uiso | 1.00 |
| Ti134 | Ti | 0.39113 | 0.87911 | 0.89166 | 0.00000 | Uiso | 1.00 |
| Ti135 | Ti | 0.43286 | 0.86817 | 0.84203 | 0.00000 | Uiso | 1.00 |
| Ti136 | Ti | 0.33505 | 0.74399 | 0.90142 | 0.00000 | Uiso | 1.00 |
| O137  | O  | 0.44111 | 0.74640 | 0.85611 | 0.00000 | Uiso | 1.00 |
| O138  | O  | 0.34051 | 0.87372 | 0.90793 | 0.00000 | Uiso | 1.00 |
| O139  | O  | 0.38254 | 0.86481 | 0.85324 | 0.00000 | Uiso | 1.00 |
| O140  | O  | 0.28512 | 0.71613 | 0.91034 | 0.00000 | Uiso | 1.00 |
| O141  | O  | 0.38926 | 0.74751 | 0.89595 | 0.00000 | Uiso | 1.00 |
| O142  | O  | 0.48025 | 0.86937 | 0.82839 | 0.00000 | Uiso | 1.00 |

|       |    |          |         |         |         |      |      |
|-------|----|----------|---------|---------|---------|------|------|
| O143  | O  | 0.44191  | 0.90105 | 0.88027 | 0.00000 | Uiso | 1.00 |
| O144  | O  | 0.31365  | 0.76843 | 0.86501 | 0.00000 | Uiso | 1.00 |
| Ti145 | Ti | 0.28888  | 0.50060 | 0.94855 | 0.00000 | Uiso | 1.00 |
| Ti146 | Ti | 0.13454  | 0.62383 | 0.85179 | 0.00000 | Uiso | 1.00 |
| Ti147 | Ti | 0.22645  | 0.61962 | 0.94978 | 0.00000 | Uiso | 1.00 |
| Ti148 | Ti | 0.07538  | 0.49760 | 0.85923 | 0.00000 | Uiso | 1.00 |
| O149  | O  | 0.24205  | 0.49253 | 0.96118 | 0.00000 | Uiso | 1.00 |
| O150  | O  | 0.08575  | 0.62336 | 0.84180 | 0.00000 | Uiso | 1.00 |
| O151  | O  | 0.17565  | 0.60804 | 0.96106 | 0.00000 | Uiso | 1.00 |
| O152  | O  | 0.02655  | 0.52817 | 0.86744 | 0.00000 | Uiso | 1.00 |
| O153  | O  | 0.12442  | 0.49827 | 0.86732 | 0.00000 | Uiso | 1.00 |
| O154  | O  | 0.27868  | 0.62243 | 0.95952 | 0.00000 | Uiso | 1.00 |
| O155  | O  | 0.18197  | 0.64773 | 0.83707 | 0.00000 | Uiso | 1.00 |
| O156  | O  | 0.11632  | 0.52538 | 0.96778 | 0.00000 | Uiso | 1.00 |
| Ti157 | Ti | 0.25829  | 0.49917 | 0.87503 | 0.00000 | Uiso | 1.00 |
| Ti158 | Ti | 0.15598  | 0.61985 | 0.92236 | 0.00000 | Uiso | 1.00 |
| Ti159 | Ti | 0.20162  | 0.63018 | 0.87472 | 0.00000 | Uiso | 1.00 |
| Ti160 | Ti | 0.09722  | 0.49870 | 0.93184 | 0.00000 | Uiso | 1.00 |
| O161  | O  | 0.20441  | 0.49943 | 0.86699 | 0.00000 | Uiso | 1.00 |
| O162  | O  | 0.10206  | 0.62597 | 0.92341 | 0.00000 | Uiso | 1.00 |
| O163  | O  | 0.15445  | 0.64650 | 0.88544 | 0.00000 | Uiso | 1.00 |
| O164  | O  | 0.04558  | 0.49016 | 0.94446 | 0.00000 | Uiso | 1.00 |
| O165  | O  | 0.14551  | 0.49902 | 0.91647 | 0.00000 | Uiso | 1.00 |
| O166  | O  | 0.24928  | 0.62628 | 0.86120 | 0.00000 | Uiso | 1.00 |
| O167  | O  | 0.20728  | 0.59895 | 0.91320 | 0.00000 | Uiso | 1.00 |
| O168  | O  | 0.07080  | 0.47167 | 0.89839 | 0.00000 | Uiso | 1.00 |
| Ti169 | Ti | 0.28813  | 0.74506 | 0.94805 | 0.00000 | Uiso | 1.00 |
| Ti170 | Ti | 0.13289  | 0.87035 | 0.85196 | 0.00000 | Uiso | 1.00 |
| Ti171 | Ti | 0.23051  | 0.87569 | 0.94345 | 0.00000 | Uiso | 1.00 |
| Ti172 | Ti | 0.07354  | 0.74736 | 0.85923 | 0.00000 | Uiso | 1.00 |
| O173  | O  | 0.23911  | 0.75172 | 0.95705 | 0.00000 | Uiso | 1.00 |
| O174  | O  | 0.08313  | 0.87163 | 0.84050 | 0.00000 | Uiso | 1.00 |
| O175  | O  | 0.18264  | 0.89098 | 0.96049 | 0.00000 | Uiso | 1.00 |
| O176  | O  | 0.02433  | 0.72261 | 0.86930 | 0.00000 | Uiso | 1.00 |
| O177  | O  | 0.12104  | 0.74584 | 0.86814 | 0.00000 | Uiso | 1.00 |
| O178  | O  | 0.28328  | 0.87337 | 0.93482 | 0.00000 | Uiso | 1.00 |
| O179  | O  | 0.18058  | 0.84782 | 0.83759 | 0.00000 | Uiso | 1.00 |
| O180  | O  | 0.11622  | 0.72390 | 0.97119 | 0.00000 | Uiso | 1.00 |
| Ti181 | Ti | 0.26293  | 0.74929 | 0.87685 | 0.00000 | Uiso | 1.00 |
| Ti182 | Ti | 0.15771  | 0.88056 | 0.92495 | 0.00000 | Uiso | 1.00 |
| Ti183 | Ti | 0.19959  | 0.86877 | 0.87513 | 0.00000 | Uiso | 1.00 |
| Ti184 | Ti | 0.10059  | 0.75074 | 0.93395 | 0.00000 | Uiso | 1.00 |
| O185  | O  | 0.21221  | 0.74987 | 0.88757 | 0.00000 | Uiso | 1.00 |
| O186  | O  | 0.10892  | 0.87494 | 0.94068 | 0.00000 | Uiso | 1.00 |
| O187  | O  | 0.15092  | 0.85433 | 0.88732 | 0.00000 | Uiso | 1.00 |
| O188  | O  | 0.04894  | 0.76087 | 0.94578 | 0.00000 | Uiso | 1.00 |
| O189  | O  | 0.15432  | 0.74957 | 0.92787 | 0.00000 | Uiso | 1.00 |
| O190  | O  | 0.24750  | 0.87242 | 0.86401 | 0.00000 | Uiso | 1.00 |
| O191  | O  | 0.20564  | 0.90394 | 0.91133 | 0.00000 | Uiso | 1.00 |
| O192  | O  | 0.07448  | 0.77613 | 0.89859 | 0.00000 | Uiso | 1.00 |
| Ti193 | Ti | -0.00691 | 0.00279 | 0.83873 | 0.00000 | Uiso | 1.00 |

|       |    |          |          |         |         |      |      |
|-------|----|----------|----------|---------|---------|------|------|
| Ti194 | Ti | 0.89090  | 0.12854  | 0.88921 | 0.00000 | Uiso | 1.00 |
| Ti195 | Ti | 0.93664  | 0.12188  | 0.84638 | 0.00000 | Uiso | 1.00 |
| Ti196 | Ti | 0.83362  | 0.00396  | 0.90227 | 0.00000 | Uiso | 1.00 |
| O197  | O  | 0.95200  | 0.00142  | 0.86062 | 0.00000 | Uiso | 1.00 |
| O198  | O  | 0.83917  | 0.12267  | 0.89152 | 0.00000 | Uiso | 1.00 |
| O199  | O  | 0.88671  | 0.10872  | 0.84900 | 0.00000 | Uiso | 1.00 |
| O200  | O  | 0.78413  | 0.03574  | 0.91200 | 0.00000 | Uiso | 1.00 |
| O201  | O  | 0.88786  | -0.00131 | 0.89816 | 0.00000 | Uiso | 1.00 |
| O202  | O  | 0.97721  | 0.12576  | 0.82251 | 0.00000 | Uiso | 1.00 |
| O203  | O  | 0.94168  | 0.15322  | 0.88331 | 0.00000 | Uiso | 1.00 |
| O204  | O  | 0.80880  | -0.02083 | 0.86687 | 0.00000 | Uiso | 1.00 |
| Ti205 | Ti | 0.02092  | -0.00366 | 0.90684 | 0.00000 | Uiso | 1.00 |
| Ti206 | Ti | 0.91304  | 0.12055  | 0.96187 | 0.00000 | Uiso | 1.00 |
| Ti207 | Ti | 0.96446  | 0.12839  | 0.91887 | 0.00000 | Uiso | 1.00 |
| Ti208 | Ti | 0.85608  | -0.00117 | 0.97564 | 0.00000 | Uiso | 1.00 |
| O209  | O  | 0.96629  | 0.00084  | 0.91027 | 0.00000 | Uiso | 1.00 |
| O210  | O  | 0.87412  | 0.12460  | 0.98916 | 0.00000 | Uiso | 1.00 |
| O211  | O  | 0.91317  | 0.15225  | 0.92462 | 0.00000 | Uiso | 1.00 |
| O212  | O  | 0.80617  | -0.02705 | 0.98509 | 0.00000 | Uiso | 1.00 |
| O213  | O  | 0.89450  | -0.00132 | 0.94980 | 0.00000 | Uiso | 1.00 |
| O214  | O  | 0.01874  | 0.12297  | 0.91544 | 0.00000 | Uiso | 1.00 |
| O215  | O  | 0.96436  | 0.10762  | 0.95979 | 0.00000 | Uiso | 1.00 |
| O216  | O  | 0.83620  | 0.03096  | 0.94070 | 0.00000 | Uiso | 1.00 |
| Ti217 | Ti | -0.00849 | 0.25017  | 0.83940 | 0.00000 | Uiso | 1.00 |
| Ti218 | Ti | 0.88883  | 0.36974  | 0.89267 | 0.00000 | Uiso | 1.00 |
| Ti219 | Ti | 0.93453  | 0.38171  | 0.84636 | 0.00000 | Uiso | 1.00 |
| Ti220 | Ti | 0.82946  | 0.24482  | 0.89914 | 0.00000 | Uiso | 1.00 |
| O221  | O  | 0.94809  | 0.25183  | 0.85784 | 0.00000 | Uiso | 1.00 |
| O222  | O  | 0.83818  | 0.37437  | 0.90835 | 0.00000 | Uiso | 1.00 |
| O223  | O  | 0.88308  | 0.39354  | 0.85249 | 0.00000 | Uiso | 1.00 |
| O224  | O  | 0.77972  | 0.21854  | 0.91112 | 0.00000 | Uiso | 1.00 |
| O225  | O  | 0.87797  | 0.25080  | 0.88464 | 0.00000 | Uiso | 1.00 |
| O226  | O  | 0.97806  | 0.37732  | 0.82458 | 0.00000 | Uiso | 1.00 |
| O227  | O  | 0.93781  | 0.34460  | 0.88234 | 0.00000 | Uiso | 1.00 |
| O228  | O  | 0.80841  | 0.26218  | 0.86173 | 0.00000 | Uiso | 1.00 |
| Ti229 | Ti | 0.02521  | 0.25264  | 0.90927 | 0.00000 | Uiso | 1.00 |
| Ti230 | Ti | 0.91559  | 0.38117  | 0.96194 | 0.00000 | Uiso | 1.00 |
| Ti231 | Ti | 0.96230  | 0.36960  | 0.91609 | 0.00000 | Uiso | 1.00 |
| Ti232 | Ti | 0.85718  | 0.25110  | 0.97444 | 0.00000 | Uiso | 1.00 |
| O233  | O  | 0.97591  | 0.24926  | 0.92403 | 0.00000 | Uiso | 1.00 |
| O234  | O  | 0.87646  | 0.37563  | 0.98737 | 0.00000 | Uiso | 1.00 |
| O235  | O  | 0.91331  | 0.34303  | 0.92622 | 0.00000 | Uiso | 1.00 |
| O236  | O  | 0.80807  | 0.27832  | 0.98474 | 0.00000 | Uiso | 1.00 |
| O237  | O  | 0.89883  | 0.25224  | 0.95295 | 0.00000 | Uiso | 1.00 |
| O238  | O  | 0.01159  | 0.37411  | 0.90088 | 0.00000 | Uiso | 1.00 |
| O239  | O  | 0.96730  | 0.39305  | 0.95638 | 0.00000 | Uiso | 1.00 |
| O240  | O  | 0.83661  | 0.22371  | 0.93822 | 0.00000 | Uiso | 1.00 |
| Ti241 | Ti | 0.75848  | -0.00273 | 0.88091 | 0.00000 | Uiso | 1.00 |
| Ti242 | Ti | 0.65720  | 0.12760  | 0.92699 | 0.00000 | Uiso | 1.00 |
| Ti243 | Ti | 0.69828  | 0.12364  | 0.87677 | 0.00000 | Uiso | 1.00 |
| Ti244 | Ti | 0.59902  | -0.00101 | 0.93168 | 0.00000 | Uiso | 1.00 |



|       |    |         |          |         |         |      |      |
|-------|----|---------|----------|---------|---------|------|------|
| O245  | O  | 0.70559 | -0.00465 | 0.89049 | 0.00000 | Uiso | 1.00 |
| O246  | O  | 0.60765 | 0.12118  | 0.94139 | 0.00000 | Uiso | 1.00 |
| O247  | O  | 0.65041 | 0.15381  | 0.88922 | 0.00000 | Uiso | 1.00 |
| O248  | O  | 0.54870 | 0.00723  | 0.94676 | 0.00000 | Uiso | 1.00 |
| O249  | O  | 0.64957 | -0.00088 | 0.91564 | 0.00000 | Uiso | 1.00 |
| O250  | O  | 0.74610 | 0.11559  | 0.86311 | 0.00000 | Uiso | 1.00 |
| O251  | O  | 0.70718 | 0.15418  | 0.91455 | 0.00000 | Uiso | 1.00 |
| O252  | O  | 0.57094 | 0.02716  | 0.89847 | 0.00000 | Uiso | 1.00 |
| Ti253 | Ti | 0.78841 | 0.00373  | 0.94890 | 0.00000 | Uiso | 1.00 |
| Ti254 | Ti | 0.62988 | 0.11452  | 0.85624 | 0.00000 | Uiso | 1.00 |
| Ti255 | Ti | 0.72773 | 0.12667  | 0.95042 | 0.00000 | Uiso | 1.00 |
| Ti256 | Ti | 0.56962 | -0.00437 | 0.86001 | 0.00000 | Uiso | 1.00 |
| O257  | O  | 0.74050 | -0.00333 | 0.95771 | 0.00000 | Uiso | 1.00 |
| O258  | O  | 0.58120 | 0.12012  | 0.84217 | 0.00000 | Uiso | 1.00 |
| O259  | O  | 0.67906 | 0.10840  | 0.96411 | 0.00000 | Uiso | 1.00 |
| O260  | O  | 0.51957 | -0.02372 | 0.87077 | 0.00000 | Uiso | 1.00 |
| O261  | O  | 0.61639 | -0.00556 | 0.87341 | 0.00000 | Uiso | 1.00 |
| O262  | O  | 0.77956 | 0.12633  | 0.96082 | 0.00000 | Uiso | 1.00 |
| O263  | O  | 0.67677 | 0.09430  | 0.84061 | 0.00000 | Uiso | 1.00 |
| O264  | O  | 0.61950 | -0.02955 | 0.96695 | 0.00000 | Uiso | 1.00 |
| Ti265 | Ti | 0.75944 | 0.24538  | 0.87489 | 0.00000 | Uiso | 1.00 |
| Ti266 | Ti | 0.65419 | 0.36838  | 0.92309 | 0.00000 | Uiso | 1.00 |
| Ti267 | Ti | 0.69886 | 0.36761  | 0.87637 | 0.00000 | Uiso | 1.00 |
| Ti268 | Ti | 0.59500 | 0.24750  | 0.93630 | 0.00000 | Uiso | 1.00 |
| O269  | O  | 0.70782 | 0.24572  | 0.86443 | 0.00000 | Uiso | 1.00 |
| O270  | O  | 0.60028 | 0.37324  | 0.92368 | 0.00000 | Uiso | 1.00 |
| O271  | O  | 0.65191 | 0.33513  | 0.88635 | 0.00000 | Uiso | 1.00 |
| O272  | O  | 0.54191 | 0.23577  | 0.94521 | 0.00000 | Uiso | 1.00 |
| O273  | O  | 0.64734 | 0.24956  | 0.93429 | 0.00000 | Uiso | 1.00 |
| O274  | O  | 0.74680 | 0.37556  | 0.86673 | 0.00000 | Uiso | 1.00 |
| O275  | O  | 0.70382 | 0.33522  | 0.91321 | 0.00000 | Uiso | 1.00 |
| O276  | O  | 0.57086 | 0.22065  | 0.90059 | 0.00000 | Uiso | 1.00 |
| Ti277 | Ti | 0.78836 | 0.24924  | 0.94888 | 0.00000 | Uiso | 1.00 |
| Ti278 | Ti | 0.63154 | 0.37864  | 0.85503 | 0.00000 | Uiso | 1.00 |
| Ti279 | Ti | 0.72920 | 0.37475  | 0.94394 | 0.00000 | Uiso | 1.00 |
| Ti280 | Ti | 0.57333 | 0.24591  | 0.86077 | 0.00000 | Uiso | 1.00 |
| O281  | O  | 0.74067 | 0.25662  | 0.96199 | 0.00000 | Uiso | 1.00 |
| O282  | O  | 0.58373 | 0.37080  | 0.84296 | 0.00000 | Uiso | 1.00 |
| O283  | O  | 0.67984 | 0.39465  | 0.95813 | 0.00000 | Uiso | 1.00 |
| O284  | O  | 0.52528 | 0.27886  | 0.86899 | 0.00000 | Uiso | 1.00 |
| O285  | O  | 0.62124 | 0.24804  | 0.86843 | 0.00000 | Uiso | 1.00 |
| O286  | O  | 0.78200 | 0.37655  | 0.93493 | 0.00000 | Uiso | 1.00 |
| O287  | O  | 0.67903 | 0.39910  | 0.83993 | 0.00000 | Uiso | 1.00 |
| O288  | O  | 0.60777 | 0.27573  | 0.97423 | 0.00000 | Uiso | 1.00 |
| Ti289 | Ti | 0.52323 | 0.00267  | 0.91036 | 0.00000 | Uiso | 1.00 |
| Ti290 | Ti | 0.41329 | 0.13138  | 0.96131 | 0.00000 | Uiso | 1.00 |
| Ti291 | Ti | 0.46044 | 0.11890  | 0.91592 | 0.00000 | Uiso | 1.00 |
| Ti292 | Ti | 0.35730 | 0.00018  | 0.97402 | 0.00000 | Uiso | 1.00 |
| O293  | O  | 0.47430 | -0.00183 | 0.92478 | 0.00000 | Uiso | 1.00 |
| O294  | O  | 0.37463 | 0.12606  | 0.98895 | 0.00000 | Uiso | 1.00 |
| O295  | O  | 0.41023 | 0.09408  | 0.92463 | 0.00000 | Uiso | 1.00 |

|       |    |         |          |         |         |      |      |
|-------|----|---------|----------|---------|---------|------|------|
| O296  | O  | 0.30836 | -0.02657 | 0.98436 | 0.00000 | Uiso | 1.00 |
| O297  | O  | 0.39871 | -0.00042 | 0.95228 | 0.00000 | Uiso | 1.00 |
| O298  | O  | 0.51016 | 0.12362  | 0.90216 | 0.00000 | Uiso | 1.00 |
| O299  | O  | 0.46481 | 0.14375  | 0.95616 | 0.00000 | Uiso | 1.00 |
| O300  | O  | 0.33712 | 0.02669  | 0.93765 | 0.00000 | Uiso | 1.00 |
| Ti301 | Ti | 0.48796 | -0.00065 | 0.83935 | 0.00000 | Uiso | 1.00 |
| Ti302 | Ti | 0.39030 | 0.11943  | 0.88857 | 0.00000 | Uiso | 1.00 |
| Ti303 | Ti | 0.43475 | 0.13188  | 0.84485 | 0.00000 | Uiso | 1.00 |
| Ti304 | Ti | 0.32984 | 0.00255  | 0.89875 | 0.00000 | Uiso | 1.00 |
| O305  | O  | 0.43706 | 0.00062  | 0.83564 | 0.00000 | Uiso | 1.00 |
| O306  | O  | 0.33885 | 0.12558  | 0.89139 | 0.00000 | Uiso | 1.00 |
| O307  | O  | 0.38515 | 0.14603  | 0.84908 | 0.00000 | Uiso | 1.00 |
| O308  | O  | 0.28006 | 0.02774  | 0.91060 | 0.00000 | Uiso | 1.00 |
| O309  | O  | 0.37846 | -0.00191 | 0.88395 | 0.00000 | Uiso | 1.00 |
| O310  | O  | 0.47974 | 0.12790  | 0.82559 | 0.00000 | Uiso | 1.00 |
| O311  | O  | 0.43985 | 0.08896  | 0.88075 | 0.00000 | Uiso | 1.00 |
| O312  | O  | 0.30783 | -0.01761 | 0.86186 | 0.00000 | Uiso | 1.00 |
| Ti313 | Ti | 0.52032 | 0.24560  | 0.90765 | 0.00000 | Uiso | 1.00 |
| Ti314 | Ti | 0.41405 | 0.37007  | 0.96186 | 0.00000 | Uiso | 1.00 |
| Ti315 | Ti | 0.46437 | 0.37843  | 0.91877 | 0.00000 | Uiso | 1.00 |
| Ti316 | Ti | 0.35549 | 0.25087  | 0.97566 | 0.00000 | Uiso | 1.00 |
| O317  | O  | 0.46564 | 0.25078  | 0.90991 | 0.00000 | Uiso | 1.00 |
| O318  | O  | 0.37530 | 0.37538  | 0.98723 | 0.00000 | Uiso | 1.00 |
| O319  | O  | 0.41465 | 0.40564  | 0.92578 | 0.00000 | Uiso | 1.00 |
| O320  | O  | 0.30526 | 0.27338  | 0.98514 | 0.00000 | Uiso | 1.00 |
| O321  | O  | 0.39361 | 0.25252  | 0.94959 | 0.00000 | Uiso | 1.00 |
| O322  | O  | 0.51839 | 0.37235  | 0.91610 | 0.00000 | Uiso | 1.00 |
| O323  | O  | 0.46500 | 0.35520  | 0.95938 | 0.00000 | Uiso | 1.00 |
| O324  | O  | 0.33571 | 0.21620  | 0.94095 | 0.00000 | Uiso | 1.00 |
| Ti325 | Ti | 0.49259 | 0.24890  | 0.84116 | 0.00000 | Uiso | 1.00 |
| Ti326 | Ti | 0.38988 | 0.37721  | 0.89322 | 0.00000 | Uiso | 1.00 |
| Ti327 | Ti | 0.43243 | 0.36295  | 0.84695 | 0.00000 | Uiso | 1.00 |
| Ti328 | Ti | 0.33453 | 0.24422  | 0.90251 | 0.00000 | Uiso | 1.00 |
| O329  | O  | 0.45051 | 0.24647  | 0.86114 | 0.00000 | Uiso | 1.00 |
| O330  | O  | 0.33948 | 0.37280  | 0.90940 | 0.00000 | Uiso | 1.00 |
| O331  | O  | 0.38189 | 0.35098  | 0.85401 | 0.00000 | Uiso | 1.00 |
| O332  | O  | 0.28458 | 0.21598  | 0.91089 | 0.00000 | Uiso | 1.00 |
| O333  | O  | 0.38889 | 0.24808  | 0.89871 | 0.00000 | Uiso | 1.00 |
| O334  | O  | 0.47528 | 0.36410  | 0.82444 | 0.00000 | Uiso | 1.00 |
| O335  | O  | 0.44000 | 0.40553  | 0.88291 | 0.00000 | Uiso | 1.00 |
| O336  | O  | 0.31366 | 0.26996  | 0.86594 | 0.00000 | Uiso | 1.00 |
| Ti337 | Ti | 0.28903 | 0.00025  | 0.94828 | 0.00000 | Uiso | 1.00 |
| Ti338 | Ti | 0.13453 | 0.12390  | 0.85179 | 0.00000 | Uiso | 1.00 |
| Ti339 | Ti | 0.22633 | 0.11922  | 0.94986 | 0.00000 | Uiso | 1.00 |
| Ti340 | Ti | 0.07538 | -0.00240 | 0.85921 | 0.00000 | Uiso | 1.00 |
| O341  | O  | 0.24220 | -0.00798 | 0.96095 | 0.00000 | Uiso | 1.00 |
| O342  | O  | 0.08574 | 0.12341  | 0.84180 | 0.00000 | Uiso | 1.00 |
| O343  | O  | 0.17554 | 0.10738  | 0.96109 | 0.00000 | Uiso | 1.00 |
| O344  | O  | 0.02655 | 0.02818  | 0.86743 | 0.00000 | Uiso | 1.00 |
| O345  | O  | 0.12444 | -0.00175 | 0.86726 | 0.00000 | Uiso | 1.00 |
| O346  | O  | 0.27847 | 0.12174  | 0.95977 | 0.00000 | Uiso | 1.00 |

|       |    |          |          |         |         |      |      |
|-------|----|----------|----------|---------|---------|------|------|
| O347  | O  | 0.18196  | 0.14818  | 0.83712 | 0.00000 | Uiso | 1.00 |
| O348  | O  | 0.11631  | 0.02515  | 0.96777 | 0.00000 | Uiso | 1.00 |
| Ti349 | Ti | 0.25837  | -0.00051 | 0.87483 | 0.00000 | Uiso | 1.00 |
| Ti350 | Ti | 0.15594  | 0.11975  | 0.92239 | 0.00000 | Uiso | 1.00 |
| Ti351 | Ti | 0.20159  | 0.13033  | 0.87477 | 0.00000 | Uiso | 1.00 |
| Ti352 | Ti | 0.09722  | -0.00139 | 0.93182 | 0.00000 | Uiso | 1.00 |
| O353  | O  | 0.20447  | -0.00035 | 0.86683 | 0.00000 | Uiso | 1.00 |
| O354  | O  | 0.10203  | 0.12591  | 0.92346 | 0.00000 | Uiso | 1.00 |
| O355  | O  | 0.15439  | 0.14649  | 0.88548 | 0.00000 | Uiso | 1.00 |
| O356  | O  | 0.04558  | -0.01002 | 0.94444 | 0.00000 | Uiso | 1.00 |
| O357  | O  | 0.14550  | -0.00097 | 0.91639 | 0.00000 | Uiso | 1.00 |
| O358  | O  | 0.24928  | 0.12689  | 0.86128 | 0.00000 | Uiso | 1.00 |
| O359  | O  | 0.20724  | 0.09891  | 0.91323 | 0.00000 | Uiso | 1.00 |
| O360  | O  | 0.07079  | -0.02834 | 0.89837 | 0.00000 | Uiso | 1.00 |
| Ti361 | Ti | 0.28769  | 0.24457  | 0.94864 | 0.00000 | Uiso | 1.00 |
| Ti362 | Ti | 0.13287  | 0.37034  | 0.85206 | 0.00000 | Uiso | 1.00 |
| Ti363 | Ti | 0.23028  | 0.37575  | 0.94383 | 0.00000 | Uiso | 1.00 |
| Ti364 | Ti | 0.07353  | 0.24736  | 0.85926 | 0.00000 | Uiso | 1.00 |
| O365  | O  | 0.23869  | 0.25145  | 0.95748 | 0.00000 | Uiso | 1.00 |
| O366  | O  | 0.08314  | 0.37163  | 0.84053 | 0.00000 | Uiso | 1.00 |
| O367  | O  | 0.18236  | 0.39120  | 0.96071 | 0.00000 | Uiso | 1.00 |
| O368  | O  | 0.02431  | 0.22263  | 0.86932 | 0.00000 | Uiso | 1.00 |
| O369  | O  | 0.12101  | 0.24581  | 0.86820 | 0.00000 | Uiso | 1.00 |
| O370  | O  | 0.28301  | 0.37317  | 0.93550 | 0.00000 | Uiso | 1.00 |
| O371  | O  | 0.18056  | 0.34778  | 0.83773 | 0.00000 | Uiso | 1.00 |
| O372  | O  | 0.11611  | 0.22386  | 0.97128 | 0.00000 | Uiso | 1.00 |
| Ti373 | Ti | 0.26280  | 0.24955  | 0.87725 | 0.00000 | Uiso | 1.00 |
| Ti374 | Ti | 0.15764  | 0.38053  | 0.92508 | 0.00000 | Uiso | 1.00 |
| Ti375 | Ti | 0.19950  | 0.36870  | 0.87531 | 0.00000 | Uiso | 1.00 |
| Ti376 | Ti | 0.10054  | 0.25070  | 0.93402 | 0.00000 | Uiso | 1.00 |
| O377  | O  | 0.21205  | 0.24992  | 0.88779 | 0.00000 | Uiso | 1.00 |
| O378  | O  | 0.10883  | 0.37498  | 0.94075 | 0.00000 | Uiso | 1.00 |
| O379  | O  | 0.15081  | 0.35436  | 0.88746 | 0.00000 | Uiso | 1.00 |
| O380  | O  | 0.04887  | 0.26084  | 0.94581 | 0.00000 | Uiso | 1.00 |
| O381  | O  | 0.15428  | 0.24949  | 0.92803 | 0.00000 | Uiso | 1.00 |
| O382  | O  | 0.24739  | 0.37226  | 0.86417 | 0.00000 | Uiso | 1.00 |
| O383  | O  | 0.20561  | 0.40374  | 0.91154 | 0.00000 | Uiso | 1.00 |
| O384  | O  | 0.07447  | 0.27608  | 0.89863 | 0.00000 | Uiso | 1.00 |
| C385  | C  | -0.57423 | -0.24920 | 0.50346 | 0.00000 | Uiso | 1.00 |
| C386  | C  | -0.56850 | -0.23552 | 0.52828 | 0.00000 | Uiso | 1.00 |
| C387  | C  | -0.56239 | -0.22102 | 0.55545 | 0.00000 | Uiso | 1.00 |
| C388  | C  | -0.55714 | -0.20781 | 0.58028 | 0.00000 | Uiso | 1.00 |
| C389  | C  | -0.55195 | -0.19293 | 0.60748 | 0.00000 | Uiso | 1.00 |
| C390  | C  | -0.54790 | -0.17837 | 0.63248 | 0.00000 | Uiso | 1.00 |
| C391  | C  | -0.54449 | -0.16045 | 0.66041 | 0.00000 | Uiso | 1.00 |
| C392  | C  | -0.55326 | -0.08331 | 0.67144 | 0.00000 | Uiso | 1.00 |
| S393  | S  | -0.53143 | -0.24161 | 0.68602 | 0.00000 | Uiso | 1.00 |
| C394  | C  | -0.55099 | -0.08125 | 0.70033 | 0.00000 | Uiso | 1.00 |
| H395  | H  | -0.56244 | -0.02774 | 0.65911 | 0.00000 | Uiso | 1.00 |
| C396  | C  | -0.54039 | -0.15677 | 0.71195 | 0.00000 | Uiso | 1.00 |
| H397  | H  | -0.55835 | -0.02338 | 0.71239 | 0.00000 | Uiso | 1.00 |

|      |   |          |          |         |         |      |      |
|------|---|----------|----------|---------|---------|------|------|
| C398 | C | -0.54024 | -0.16744 | 0.74091 | 0.00000 | Uiso | 1.00 |
| H399 | H | -0.55099 | -0.11300 | 0.75291 | 0.00000 | Uiso | 1.00 |
| C400 | C | -0.52986 | -0.23879 | 0.75581 | 0.00000 | Uiso | 1.00 |
| C401 | C | -0.51277 | -0.30986 | 0.74486 | 0.00000 | Uiso | 1.00 |
| P402 | P | -0.54025 | -0.24295 | 0.79361 | 0.00000 | Uiso | 1.00 |
| O403 | O | -0.56134 | -0.14675 | 0.80426 | 0.00000 | Uiso | 1.00 |
| O404 | O | -0.56575 | -0.33379 | 0.80090 | 0.00000 | Uiso | 1.00 |
| N405 | N | -0.49804 | -0.37096 | 0.73626 | 0.00000 | Uiso | 1.00 |
| C406 | C | -0.58059 | -0.26534 | 0.47583 | 0.00000 | Uiso | 1.00 |
| C407 | C | -0.57320 | -0.34175 | 0.46358 | 0.00000 | Uiso | 1.00 |
| S408 | S | -0.60017 | -0.18525 | 0.45274 | 0.00000 | Uiso | 1.00 |
| C409 | C | -0.58190 | -0.34416 | 0.43547 | 0.00000 | Uiso | 1.00 |
| H410 | H | -0.56158 | -0.39724 | 0.47450 | 0.00000 | Uiso | 1.00 |
| C411 | C | -0.59574 | -0.26945 | 0.42598 | 0.00000 | Uiso | 1.00 |
| H412 | H | -0.57780 | -0.40186 | 0.42241 | 0.00000 | Uiso | 1.00 |
| H413 | H | -0.60641 | -0.31637 | 0.38596 | 0.00000 | Uiso | 1.00 |
| C414 | C | -0.62045 | -0.18111 | 0.38736 | 0.00000 | Uiso | 1.00 |
| C415 | C | -0.64266 | -0.17783 | 0.36625 | 0.00000 | Uiso | 1.00 |
| C416 | C | -0.64545 | -0.08977 | 0.35842 | 0.00000 | Uiso | 1.00 |
| H417 | H | -0.65546 | -0.23370 | 0.35660 | 0.00000 | Uiso | 1.00 |
| C418 | C | -0.62428 | -0.04264 | 0.37455 | 0.00000 | Uiso | 1.00 |
| H419 | H | -0.66150 | -0.06383 | 0.34170 | 0.00000 | Uiso | 1.00 |
| H420 | H | -0.62046 | 0.02828  | 0.37306 | 0.00000 | Uiso | 1.00 |
| N421 | N | -0.60679 | -0.26090 | 0.39903 | 0.00000 | Uiso | 1.00 |
| N422 | N | -0.60754 | -0.09529 | 0.39288 | 0.00000 | Uiso | 1.00 |
| H423 | H | -0.58864 | -0.07706 | 0.40740 | 0.00000 | Uiso | 1.00 |
| O424 | O | 0.49276  | 0.74464  | 0.81102 | 0.00000 | Uiso | 1.00 |
| H425 | H | 0.36416  | 0.64822  | 0.83516 | 0.00000 | Uiso | 1.00 |
| H426 | H | 0.35853  | 0.85864  | 0.83946 | 0.00000 | Uiso | 1.00 |

loop\_

\_geom\_bond\_atom\_site\_label\_1

\_geom\_bond\_atom\_site\_label\_2

\_geom\_bond\_distance

\_geom\_bond\_site\_symmetry\_2

\_ccdc\_geom\_bond\_type

|     |      |       |       |   |
|-----|------|-------|-------|---|
| Ti1 | O5   | 1.900 | 1_455 | S |
| Ti1 | O10  | 2.103 | 1_455 | S |
| Ti1 | O152 | 1.919 | .     | S |
| Ti1 | O226 | 2.093 | 1_455 | S |
| Ti2 | O6   | 2.006 | .     | S |
| Ti2 | O11  | 2.019 | .     | S |
| Ti2 | O9   | 2.010 | .     | S |
| Ti2 | O19  | 1.924 | .     | S |
| Ti2 | O7   | 1.941 | .     | S |
| Ti2 | O33  | 1.925 | .     | S |
| Ti3 | O7   | 1.946 | .     | S |
| Ti3 | O10  | 1.938 | .     | S |
| Ti3 | O5   | 2.030 | .     | S |
| Ti3 | O29  | 2.085 | .     | S |
| Ti3 | O11  | 1.828 | .     | S |
| Ti4 | O8   | 2.028 | .     | S |

|      |       |       |       |   |
|------|-------|-------|-------|---|
| Ti4  | O9    | 2.109 | .     | S |
| Ti4  | O24   | 1.874 | .     | S |
| Ti4  | O6    | 1.877 | .     | S |
| Ti4  | O222  | 1.987 | .     | S |
| Ti4  | O12   | 1.973 | .     | S |
| O5   | Ti1   | 1.900 | 1_655 | S |
| O5   | Ti219 | 2.046 | .     | S |
| O6   | Ti28  | 1.917 | .     | S |
| O8   | Ti61  | 1.827 | .     | S |
| O8   | Ti49  | 1.872 | .     | S |
| O9   | Ti218 | 1.966 | .     | S |
| O10  | Ti1   | 2.103 | 1_655 | S |
| O10  | Ti25  | 2.117 | 1_655 | S |
| O11  | Ti15  | 1.942 | .     | S |
| O12  | Ti49  | 2.076 | .     | S |
| Ti13 | O17   | 2.121 | 1_455 | S |
| Ti13 | O168  | 2.006 | .     | S |
| Ti13 | O22   | 1.957 | .     | S |
| Ti13 | O152  | 1.946 | .     | S |
| Ti13 | O164  | 2.028 | .     | S |
| Ti13 | O238  | 1.903 | .     | S |
| Ti14 | O18   | 1.988 | .     | S |
| Ti14 | O23   | 1.997 | .     | S |
| Ti14 | O21   | 2.057 | .     | S |
| Ti14 | O19   | 1.834 | .     | S |
| Ti14 | O45   | 2.107 | .     | S |
| Ti15 | O19   | 2.035 | .     | S |
| Ti15 | O22   | 2.108 | 1_655 | S |
| Ti15 | O17   | 1.971 | .     | S |
| Ti15 | O41   | 1.895 | .     | S |
| Ti15 | O23   | 1.970 | .     | S |
| Ti16 | O20   | 2.021 | .     | S |
| Ti16 | O21   | 1.928 | .     | S |
| Ti16 | O18   | 2.123 | .     | S |
| Ti16 | O234  | 2.097 | .     | S |
| Ti16 | O24   | 1.893 | .     | S |
| O17  | Ti13  | 2.121 | 1_655 | S |
| O17  | Ti231 | 2.008 | .     | S |
| O18  | Ti40  | 2.138 | .     | S |
| O20  | Ti61  | 1.909 | .     | S |
| O21  | Ti230 | 2.037 | .     | S |
| O22  | Ti15  | 2.108 | 1_455 | S |
| O22  | Ti37  | 1.996 | .     | S |
| O24  | Ti61  | 1.934 | .     | S |
| Ti25 | O29   | 1.895 | 1_455 | S |
| Ti25 | O34   | 2.111 | 1_455 | S |
| Ti25 | O176  | 1.950 | .     | S |
| Ti25 | O10   | 2.117 | 1_455 | S |
| Ti26 | O30   | 2.097 | .     | S |
| Ti26 | O35   | 1.994 | .     | S |
| Ti26 | O33   | 1.884 | .     | S |

|      |       |       |       |   |
|------|-------|-------|-------|---|
| Ti26 | O43   | 1.898 | .     | S |
| Ti26 | O31   | 1.956 | .     | S |
| Ti26 | O201  | 1.966 | 1_565 | S |
| Ti27 | O31   | 2.020 | .     | S |
| Ti27 | O34   | 1.978 | .     | S |
| Ti27 | O29   | 2.103 | .     | S |
| Ti27 | O197  | 2.046 | 1_565 | S |
| Ti27 | O35   | 1.804 | .     | S |
| Ti28 | O32   | 2.046 | .     | S |
| Ti28 | O33   | 2.002 | .     | S |
| Ti28 | O48   | 1.905 | .     | S |
| Ti28 | O30   | 2.033 | .     | S |
| Ti28 | O36   | 1.974 | .     | S |
| O29  | Ti25  | 1.895 | 1_655 | S |
| O30  | Ti196 | 1.987 | 1_565 | S |
| O32  | Ti85  | 1.884 | .     | S |
| O32  | Ti73  | 1.936 | .     | S |
| O34  | Ti25  | 2.111 | 1_655 | S |
| O34  | Ti193 | 2.093 | 1_665 | S |
| O35  | Ti39  | 1.900 | .     | S |
| O36  | Ti73  | 2.012 | .     | S |
| Ti37 | O41   | 2.033 | 1_455 | S |
| Ti37 | O192  | 2.003 | .     | S |
| Ti37 | O46   | 1.950 | .     | S |
| Ti37 | O176  | 1.952 | .     | S |
| Ti37 | O188  | 1.967 | .     | S |
| Ti38 | O42   | 1.939 | .     | S |
| Ti38 | O47   | 2.026 | .     | S |
| Ti38 | O45   | 2.096 | .     | S |
| Ti38 | O43   | 1.795 | .     | S |
| Ti38 | O213  | 2.037 | 1_565 | S |
| Ti39 | O43   | 1.996 | .     | S |
| Ti39 | O46   | 2.041 | 1_655 | S |
| Ti39 | O41   | 1.929 | .     | S |
| Ti39 | O209  | 2.008 | 1_565 | S |
| Ti39 | O47   | 1.957 | .     | S |
| Ti40 | O44   | 2.005 | .     | S |
| Ti40 | O45   | 1.908 | .     | S |
| Ti40 | O42   | 2.114 | .     | S |
| Ti40 | O48   | 1.941 | .     | S |
| O41  | Ti37  | 2.033 | 1_655 | S |
| O42  | Ti208 | 2.097 | 1_565 | S |
| O44  | Ti85  | 1.918 | .     | S |
| O46  | Ti39  | 2.041 | 1_455 | S |
| O46  | Ti205 | 1.903 | 1_565 | S |
| O48  | Ti85  | 1.972 | .     | S |
| Ti49 | O53   | 2.096 | .     | S |
| Ti49 | O58   | 2.035 | .     | S |
| Ti49 | O274  | 2.011 | .     | S |
| Ti50 | O54   | 2.035 | .     | S |
| Ti50 | O59   | 2.062 | .     | S |

|      |       |       |   |   |
|------|-------|-------|---|---|
| Ti50 | O57   | 2.036 | . | S |
| Ti50 | O67   | 1.977 | . | S |
| Ti50 | O55   | 1.855 | . | S |
| Ti50 | O81   | 1.913 | . | S |
| Ti51 | O55   | 1.997 | . | S |
| Ti51 | O58   | 1.965 | . | S |
| Ti51 | O71   | 1.962 | . | S |
| Ti51 | O53   | 2.065 | . | S |
| Ti51 | O77   | 1.970 | . | S |
| Ti51 | O59   | 1.886 | . | S |
| Ti52 | O56   | 2.074 | . | S |
| Ti52 | O57   | 2.098 | . | S |
| Ti52 | O72   | 1.903 | . | S |
| Ti52 | O54   | 1.930 | . | S |
| Ti52 | O270  | 1.938 | . | S |
| Ti52 | O60   | 1.963 | . | S |
| O53  | Ti267 | 2.059 | . | S |
| O54  | Ti76  | 1.983 | . | S |
| O55  | Ti62  | 1.857 | . | S |
| O56  | Ti97  | 1.993 | . | S |
| O57  | Ti266 | 2.014 | . | S |
| O58  | Ti73  | 2.103 | . | S |
| O59  | Ti63  | 1.927 | . | S |
| O60  | Ti97  | 1.965 | . | S |
| O60  | Ti64  | 1.884 | . | S |
| Ti61 | O65   | 1.903 | . | S |
| Ti61 | O70   | 1.966 | . | S |
| Ti61 | O286  | 2.048 | . | S |
| Ti62 | O66   | 2.007 | . | S |
| Ti62 | O71   | 1.987 | . | S |
| Ti62 | O69   | 2.059 | . | S |
| Ti62 | O93   | 2.127 | . | S |
| Ti63 | O67   | 2.011 | . | S |
| Ti63 | O70   | 2.065 | . | S |
| Ti63 | O65   | 2.054 | . | S |
| Ti63 | O89   | 2.099 | . | S |
| Ti64 | O68   | 2.030 | . | S |
| Ti64 | O69   | 1.918 | . | S |
| Ti64 | O66   | 2.117 | . | S |
| Ti64 | O282  | 2.098 | . | S |
| O65  | Ti279 | 2.003 | . | S |
| O66  | Ti88  | 2.125 | . | S |
| O68  | Ti97  | 1.950 | . | S |
| O68  | Ti109 | 1.967 | . | S |
| O69  | Ti278 | 2.032 | . | S |
| O70  | Ti85  | 1.970 | . | S |
| Ti73 | O77   | 2.059 | . | S |
| Ti73 | O82   | 2.063 | . | S |
| Ti74 | O78   | 2.087 | . | S |
| Ti74 | O83   | 2.040 | . | S |
| Ti74 | O81   | 1.890 | . | S |

|      |       |       |       |   |
|------|-------|-------|-------|---|
| Ti74 | O91   | 1.979 | .     | S |
| Ti74 | O79   | 1.818 | .     | S |
| Ti74 | O249  | 2.014 | 1_565 | S |
| Ti75 | O79   | 1.940 | .     | S |
| Ti75 | O82   | 1.915 | .     | S |
| Ti75 | O95   | 1.954 | .     | S |
| Ti75 | O77   | 1.958 | .     | S |
| Ti75 | O245  | 2.060 | 1_565 | S |
| Ti75 | O83   | 1.828 | .     | S |
| Ti76 | O80   | 2.103 | .     | S |
| Ti76 | O81   | 2.027 | .     | S |
| Ti76 | O96   | 1.917 | .     | S |
| Ti76 | O78   | 2.003 | .     | S |
| Ti76 | O84   | 1.978 | .     | S |
| O78  | Ti244 | 1.939 | 1_565 | S |
| O79  | Ti86  | 1.810 | .     | S |
| O80  | Ti121 | 1.973 | .     | S |
| O82  | Ti241 | 2.012 | 1_565 | S |
| O83  | Ti87  | 1.859 | .     | S |
| O84  | Ti121 | 2.014 | .     | S |
| O84  | Ti88  | 1.930 | .     | S |
| Ti85 | O89   | 1.951 | .     | S |
| Ti85 | O94   | 2.049 | .     | S |
| Ti86 | O90   | 1.945 | .     | S |
| Ti86 | O95   | 1.999 | .     | S |
| Ti86 | O93   | 2.112 | .     | S |
| Ti86 | O261  | 2.035 | 1_565 | S |
| Ti87 | O91   | 2.047 | .     | S |
| Ti87 | O94   | 2.087 | .     | S |
| Ti87 | O89   | 2.029 | .     | S |
| Ti87 | O257  | 2.003 | 1_565 | S |
| Ti88 | O92   | 1.975 | .     | S |
| Ti88 | O93   | 1.893 | .     | S |
| Ti88 | O90   | 2.112 | .     | S |
| O90  | Ti256 | 2.104 | 1_565 | S |
| O92  | Ti121 | 1.856 | .     | S |
| O92  | Ti133 | 1.860 | .     | S |
| O94  | Ti253 | 2.048 | 1_565 | S |
| Ti97 | O101  | 2.013 | .     | S |
| Ti97 | O106  | 1.944 | .     | S |
| Ti97 | O322  | 1.981 | .     | S |
| Ti98 | O102  | 1.995 | .     | S |
| Ti98 | O107  | 2.024 | .     | S |
| Ti98 | O105  | 2.116 | .     | S |
| Ti98 | O103  | 1.827 | .     | S |
| Ti98 | O129  | 2.061 | .     | S |
| Ti99 | O103  | 2.009 | .     | S |
| Ti99 | O106  | 2.029 | .     | S |
| Ti99 | O119  | 1.910 | .     | S |
| Ti99 | O101  | 1.948 | .     | S |
| Ti99 | O125  | 2.019 | .     | S |



|       |       |       |       |   |
|-------|-------|-------|-------|---|
| Ti99  | O107  | 1.958 | .     | S |
| Ti100 | O104  | 1.998 | .     | S |
| Ti100 | O105  | 1.908 | .     | S |
| Ti100 | O102  | 2.138 | .     | S |
| Ti100 | O318  | 2.113 | .     | S |
| Ti100 | O108  | 1.936 | .     | S |
| O101  | Ti315 | 1.890 | .     | S |
| O102  | Ti124 | 2.116 | .     | S |
| O103  | Ti110 | 1.900 | .     | S |
| O104  | Ti145 | 1.915 | .     | S |
| O105  | Ti314 | 2.090 | .     | S |
| O106  | Ti121 | 1.909 | .     | S |
| O108  | Ti145 | 1.967 | .     | S |
| O108  | Ti112 | 1.898 | .     | S |
| Ti109 | O113  | 1.970 | .     | S |
| Ti109 | O118  | 2.046 | .     | S |
| Ti109 | O334  | 2.082 | .     | S |
| Ti110 | O114  | 2.006 | .     | S |
| Ti110 | O119  | 2.017 | .     | S |
| Ti110 | O117  | 1.899 | .     | S |
| Ti110 | O141  | 2.031 | .     | S |
| Ti110 | O115  | 1.852 | .     | S |
| Ti111 | O115  | 1.966 | .     | S |
| Ti111 | O118  | 1.954 | .     | S |
| Ti111 | O113  | 2.037 | .     | S |
| Ti111 | O137  | 1.977 | .     | S |
| Ti111 | O119  | 1.883 | .     | S |
| Ti111 | O404  | 2.054 | 1_665 | S |
| Ti112 | O116  | 2.040 | .     | S |
| Ti112 | O117  | 1.999 | .     | S |
| Ti112 | O114  | 1.924 | .     | S |
| Ti112 | O330  | 2.036 | .     | S |
| Ti112 | O120  | 1.972 | .     | S |
| O113  | Ti327 | 2.053 | .     | S |
| O114  | Ti136 | 1.888 | .     | S |
| O115  | H425  | 1.140 | .     | S |
| O116  | Ti145 | 1.871 | .     | S |
| O116  | Ti157 | 1.944 | .     | S |
| O117  | Ti326 | 1.868 | .     | S |
| O118  | Ti133 | 2.018 | .     | S |
| O120  | Ti157 | 2.028 | .     | S |
| Ti121 | O125  | 2.115 | .     | S |
| Ti121 | O130  | 1.954 | .     | S |
| Ti122 | O126  | 1.928 | .     | S |
| Ti122 | O131  | 1.991 | .     | S |
| Ti122 | O129  | 2.032 | .     | S |
| Ti122 | O127  | 1.797 | .     | S |
| Ti122 | O297  | 2.092 | 1_565 | S |
| Ti123 | O127  | 1.981 | .     | S |
| Ti123 | O130  | 2.091 | .     | S |
| Ti123 | O143  | 2.003 | .     | S |

|       |       |       |       |   |
|-------|-------|-------|-------|---|
| Ti123 | O125  | 1.978 | .     | S |
| Ti123 | O293  | 1.894 | 1_565 | S |
| Ti123 | O131  | 1.962 | .     | S |
| Ti124 | O128  | 2.022 | .     | S |
| Ti124 | O129  | 1.928 | .     | S |
| Ti124 | O126  | 2.097 | .     | S |
| Ti124 | O132  | 1.892 | .     | S |
| O126  | Ti292 | 2.110 | 1_565 | S |
| O127  | Ti134 | 1.856 | .     | S |
| O128  | Ti169 | 1.911 | .     | S |
| O130  | Ti289 | 1.991 | 1_565 | S |
| O132  | Ti169 | 1.947 | .     | S |
| O132  | Ti136 | 1.884 | .     | S |
| Ti133 | O137  | 1.935 | .     | S |
| Ti133 | O142  | 2.023 | .     | S |
| Ti134 | O138  | 2.107 | .     | S |
| Ti134 | O143  | 2.065 | .     | S |
| Ti134 | O141  | 1.999 | .     | S |
| Ti134 | O309  | 1.898 | 1_565 | S |
| Ti134 | O139  | 1.868 | .     | S |
| Ti135 | O139  | 2.019 | .     | S |
| Ti135 | O142  | 1.945 | .     | S |
| Ti135 | O137  | 1.983 | .     | S |
| Ti135 | O305  | 2.030 | 1_565 | S |
| Ti135 | O143  | 1.916 | .     | S |
| Ti135 | O403  | 1.823 | 1_665 | S |
| Ti136 | O140  | 2.022 | .     | S |
| Ti136 | O141  | 2.114 | .     | S |
| Ti136 | O138  | 1.995 | .     | S |
| Ti136 | O144  | 1.953 | .     | S |
| O138  | Ti304 | 2.037 | 1_565 | S |
| O139  | H426  | 1.140 | .     | S |
| O140  | Ti169 | 1.848 | .     | S |
| O140  | Ti181 | 1.876 | .     | S |
| O142  | Ti301 | 2.053 | 1_565 | S |
| O144  | Ti181 | 2.062 | .     | S |
| Ti145 | O149  | 1.913 | .     | S |
| Ti145 | O154  | 1.953 | .     | S |
| Ti145 | O370  | 2.035 | .     | S |
| Ti146 | O150  | 1.947 | .     | S |
| Ti146 | O155  | 1.997 | .     | S |
| Ti146 | O153  | 2.072 | .     | S |
| Ti146 | O163  | 1.808 | .     | S |
| Ti146 | O177  | 2.067 | .     | S |
| Ti147 | O151  | 2.044 | .     | S |
| Ti147 | O154  | 2.074 | .     | S |
| Ti147 | O167  | 1.915 | .     | S |
| Ti147 | O149  | 2.084 | .     | S |
| Ti147 | O173  | 2.083 | .     | S |
| Ti148 | O152  | 1.984 | .     | S |
| Ti148 | O153  | 1.936 | .     | S |

|       |       |       |       |   |
|-------|-------|-------|-------|---|
| Ti148 | O168  | 1.910 | .     | S |
| Ti148 | O150  | 2.111 | .     | S |
| Ti148 | O366  | 2.121 | .     | S |
| O149  | Ti363 | 2.000 | .     | S |
| O150  | Ti172 | 2.102 | .     | S |
| O151  | Ti158 | 1.998 | .     | S |
| O153  | Ti362 | 2.089 | .     | S |
| O154  | Ti169 | 1.965 | .     | S |
| O155  | Ti159 | 1.962 | .     | S |
| O156  | Ti160 | 1.904 | .     | S |
| Ti157 | O161  | 2.119 | .     | S |
| Ti157 | O166  | 2.059 | .     | S |
| Ti157 | O382  | 2.029 | .     | S |
| Ti158 | O162  | 2.089 | .     | S |
| Ti158 | O167  | 2.056 | .     | S |
| Ti158 | O165  | 1.890 | .     | S |
| Ti158 | O163  | 1.801 | .     | S |
| Ti158 | O189  | 1.978 | .     | S |
| Ti159 | O163  | 1.911 | .     | S |
| Ti159 | O166  | 1.953 | .     | S |
| Ti159 | O161  | 2.012 | .     | S |
| Ti159 | O185  | 1.952 | .     | S |
| Ti159 | O167  | 1.901 | .     | S |
| Ti160 | O164  | 2.090 | .     | S |
| Ti160 | O165  | 2.006 | .     | S |
| Ti160 | O162  | 1.973 | .     | S |
| Ti160 | O378  | 1.968 | .     | S |
| Ti160 | O168  | 1.934 | .     | S |
| O161  | Ti375 | 2.023 | .     | S |
| O162  | Ti184 | 1.951 | .     | S |
| O165  | Ti374 | 1.895 | .     | S |
| O166  | Ti181 | 2.070 | .     | S |
| Ti169 | O173  | 1.946 | .     | S |
| Ti169 | O178  | 2.046 | .     | S |
| Ti170 | O174  | 2.001 | .     | S |
| Ti170 | O179  | 1.997 | .     | S |
| Ti170 | O177  | 2.083 | .     | S |
| Ti170 | O187  | 1.835 | .     | S |
| Ti170 | O345  | 2.090 | 1_565 | S |
| Ti171 | O175  | 2.035 | .     | S |
| Ti171 | O178  | 2.082 | .     | S |
| Ti171 | O191  | 1.854 | .     | S |
| Ti171 | O173  | 2.009 | .     | S |
| Ti171 | O341  | 1.996 | 1_565 | S |
| Ti172 | O176  | 1.998 | .     | S |
| Ti172 | O177  | 1.886 | .     | S |
| Ti172 | O192  | 1.921 | .     | S |
| Ti172 | O174  | 2.110 | .     | S |
| O174  | Ti340 | 2.121 | 1_565 | S |
| O175  | Ti182 | 1.951 | .     | S |
| O178  | Ti337 | 2.033 | 1_565 | S |

|       |       |       |       |   |
|-------|-------|-------|-------|---|
| O179  | Ti183 | 1.956 | .     | S |
| O180  | Ti184 | 1.913 | .     | S |
| Ti181 | O185  | 2.027 | .     | S |
| Ti181 | O190  | 2.046 | .     | S |
| Ti182 | O186  | 2.032 | .     | S |
| Ti182 | O191  | 1.996 | .     | S |
| Ti182 | O189  | 1.988 | .     | S |
| Ti182 | O187  | 1.850 | .     | S |
| Ti182 | O357  | 1.895 | 1_565 | S |
| Ti183 | O187  | 1.982 | .     | S |
| Ti183 | O190  | 1.928 | .     | S |
| Ti183 | O185  | 1.953 | .     | S |
| Ti183 | O353  | 2.025 | 1_565 | S |
| Ti183 | O191  | 1.815 | .     | S |
| Ti184 | O188  | 2.082 | .     | S |
| Ti184 | O189  | 2.099 | .     | S |
| Ti184 | O186  | 1.930 | .     | S |
| Ti184 | O192  | 1.998 | .     | S |
| O186  | Ti352 | 1.968 | 1_565 | S |
| O190  | Ti349 | 2.031 | 1_565 | S |
| Ti193 | O197  | 1.900 | 1_455 | S |
| Ti193 | O202  | 2.103 | 1_455 | S |
| Ti193 | O344  | 1.919 | .     | S |
| Ti193 | O34   | 2.093 | 1_445 | S |
| Ti194 | O198  | 2.006 | .     | S |
| Ti194 | O203  | 2.019 | .     | S |
| Ti194 | O201  | 2.010 | .     | S |
| Ti194 | O211  | 1.924 | .     | S |
| Ti194 | O199  | 1.941 | .     | S |
| Ti194 | O225  | 1.926 | .     | S |
| Ti195 | O199  | 1.946 | .     | S |
| Ti195 | O202  | 1.938 | .     | S |
| Ti195 | O197  | 2.030 | .     | S |
| Ti195 | O221  | 2.085 | .     | S |
| Ti195 | O203  | 1.828 | .     | S |
| Ti196 | O200  | 2.028 | .     | S |
| Ti196 | O201  | 2.109 | .     | S |
| Ti196 | O216  | 1.874 | .     | S |
| Ti196 | O198  | 1.877 | .     | S |
| Ti196 | O30   | 1.987 | 1_545 | S |
| Ti196 | O204  | 1.973 | .     | S |
| O197  | Ti193 | 1.900 | 1_655 | S |
| O197  | Ti27  | 2.046 | 1_545 | S |
| O198  | Ti220 | 1.917 | .     | S |
| O200  | Ti253 | 1.826 | .     | S |
| O200  | Ti241 | 1.872 | .     | S |
| O201  | Ti26  | 1.966 | 1_545 | S |
| O202  | Ti193 | 2.103 | 1_655 | S |
| O202  | Ti217 | 2.117 | 1_655 | S |
| O203  | Ti207 | 1.942 | .     | S |
| O204  | Ti241 | 2.076 | .     | S |

|       |       |       |       |   |
|-------|-------|-------|-------|---|
| Ti205 | O209  | 2.121 | 1_455 | S |
| Ti205 | O360  | 2.006 | .     | S |
| Ti205 | O214  | 1.958 | .     | S |
| Ti205 | O344  | 1.946 | .     | S |
| Ti205 | O356  | 2.028 | .     | S |
| Ti205 | O46   | 1.903 | 1_545 | S |
| Ti206 | O210  | 1.988 | .     | S |
| Ti206 | O215  | 1.997 | .     | S |
| Ti206 | O213  | 2.057 | .     | S |
| Ti206 | O211  | 1.834 | .     | S |
| Ti206 | O237  | 2.107 | .     | S |
| Ti207 | O211  | 2.035 | .     | S |
| Ti207 | O214  | 2.108 | 1_655 | S |
| Ti207 | O209  | 1.971 | .     | S |
| Ti207 | O233  | 1.895 | .     | S |
| Ti207 | O215  | 1.970 | .     | S |
| Ti208 | O212  | 2.021 | .     | S |
| Ti208 | O213  | 1.928 | .     | S |
| Ti208 | O210  | 2.123 | .     | S |
| Ti208 | O42   | 2.097 | 1_545 | S |
| Ti208 | O216  | 1.893 | .     | S |
| O209  | Ti205 | 2.121 | 1_655 | S |
| O209  | Ti39  | 2.008 | 1_545 | S |
| O210  | Ti232 | 2.138 | .     | S |
| O212  | Ti253 | 1.909 | .     | S |
| O213  | Ti38  | 2.037 | 1_545 | S |
| O214  | Ti207 | 2.108 | 1_455 | S |
| O214  | Ti229 | 1.996 | .     | S |
| O216  | Ti253 | 1.934 | .     | S |
| Ti217 | O221  | 1.895 | 1_455 | S |
| Ti217 | O226  | 2.111 | 1_455 | S |
| Ti217 | O368  | 1.950 | .     | S |
| Ti217 | O202  | 2.117 | 1_455 | S |
| Ti218 | O222  | 2.097 | .     | S |
| Ti218 | O227  | 1.994 | .     | S |
| Ti218 | O225  | 1.884 | .     | S |
| Ti218 | O235  | 1.898 | .     | S |
| Ti218 | O223  | 1.956 | .     | S |
| Ti219 | O223  | 2.020 | .     | S |
| Ti219 | O226  | 1.978 | .     | S |
| Ti219 | O221  | 2.103 | .     | S |
| Ti219 | O227  | 1.804 | .     | S |
| Ti220 | O224  | 2.046 | .     | S |
| Ti220 | O225  | 2.002 | .     | S |
| Ti220 | O240  | 1.904 | .     | S |
| Ti220 | O222  | 2.033 | .     | S |
| Ti220 | O228  | 1.973 | .     | S |
| O221  | Ti217 | 1.895 | 1_655 | S |
| O224  | Ti277 | 1.883 | .     | S |
| O224  | Ti265 | 1.935 | .     | S |
| O226  | Ti217 | 2.111 | 1_655 | S |

|       |       |       |       |   |
|-------|-------|-------|-------|---|
| O226  | Ti1   | 2.093 | 1_655 | S |
| O227  | Ti231 | 1.900 | .     | S |
| O228  | Ti265 | 2.011 | .     | S |
| Ti229 | O233  | 2.033 | 1_455 | S |
| Ti229 | O384  | 2.003 | .     | S |
| Ti229 | O238  | 1.950 | .     | S |
| Ti229 | O368  | 1.952 | .     | S |
| Ti229 | O380  | 1.967 | .     | S |
| Ti230 | O234  | 1.939 | .     | S |
| Ti230 | O239  | 2.026 | .     | S |
| Ti230 | O237  | 2.096 | .     | S |
| Ti230 | O235  | 1.795 | .     | S |
| Ti231 | O235  | 1.996 | .     | S |
| Ti231 | O238  | 2.041 | 1_655 | S |
| Ti231 | O233  | 1.930 | .     | S |
| Ti231 | O239  | 1.957 | .     | S |
| Ti232 | O236  | 2.004 | .     | S |
| Ti232 | O237  | 1.908 | .     | S |
| Ti232 | O234  | 2.114 | .     | S |
| Ti232 | O240  | 1.941 | .     | S |
| O233  | Ti229 | 2.033 | 1_655 | S |
| O236  | Ti277 | 1.918 | .     | S |
| O238  | Ti231 | 2.041 | 1_455 | S |
| O240  | Ti277 | 1.972 | .     | S |
| Ti241 | O245  | 2.097 | .     | S |
| Ti241 | O250  | 2.034 | .     | S |
| Ti241 | O82   | 2.012 | 1_545 | S |
| Ti242 | O246  | 2.038 | .     | S |
| Ti242 | O251  | 2.062 | .     | S |
| Ti242 | O249  | 2.036 | .     | S |
| Ti242 | O259  | 1.978 | .     | S |
| Ti242 | O247  | 1.857 | .     | S |
| Ti242 | O273  | 1.913 | .     | S |
| Ti243 | O247  | 1.997 | .     | S |
| Ti243 | O250  | 1.964 | .     | S |
| Ti243 | O263  | 1.960 | .     | S |
| Ti243 | O245  | 2.064 | .     | S |
| Ti243 | O269  | 1.970 | .     | S |
| Ti243 | O251  | 1.885 | .     | S |
| Ti244 | O248  | 2.078 | .     | S |
| Ti244 | O249  | 2.099 | .     | S |
| Ti244 | O264  | 1.903 | .     | S |
| Ti244 | O246  | 1.932 | .     | S |
| Ti244 | O78   | 1.939 | 1_545 | S |
| Ti244 | O252  | 1.962 | .     | S |
| O245  | Ti75  | 2.060 | 1_545 | S |
| O246  | Ti268 | 1.984 | .     | S |
| O247  | Ti254 | 1.855 | .     | S |
| O248  | Ti289 | 1.992 | .     | S |
| O249  | Ti74  | 2.014 | 1_545 | S |
| O250  | Ti265 | 2.103 | .     | S |

|       |       |       |       |   |
|-------|-------|-------|-------|---|
| O251  | Ti255 | 1.927 | .     | S |
| O252  | Ti289 | 1.966 | .     | S |
| O252  | Ti256 | 1.889 | .     | S |
| Ti253 | O257  | 1.903 | .     | S |
| Ti253 | O262  | 1.966 | .     | S |
| Ti253 | O94   | 2.048 | 1_545 | S |
| Ti254 | O258  | 2.000 | .     | S |
| Ti254 | O263  | 1.984 | .     | S |
| Ti254 | O261  | 2.056 | .     | S |
| Ti254 | O285  | 2.125 | .     | S |
| Ti255 | O259  | 2.011 | .     | S |
| Ti255 | O262  | 2.065 | .     | S |
| Ti255 | O257  | 2.054 | .     | S |
| Ti255 | O281  | 2.099 | .     | S |
| Ti256 | O260  | 2.024 | .     | S |
| Ti256 | O261  | 1.918 | .     | S |
| Ti256 | O258  | 2.111 | .     | S |
| Ti256 | O90   | 2.104 | 1_545 | S |
| O257  | Ti87  | 2.003 | 1_545 | S |
| O258  | Ti280 | 2.117 | .     | S |
| O260  | Ti289 | 1.929 | .     | S |
| O260  | Ti301 | 1.961 | .     | S |
| O261  | Ti86  | 2.035 | 1_545 | S |
| O262  | Ti277 | 1.971 | .     | S |
| Ti265 | O269  | 2.058 | .     | S |
| Ti265 | O274  | 2.063 | .     | S |
| Ti266 | O270  | 2.087 | .     | S |
| Ti266 | O275  | 2.039 | .     | S |
| Ti266 | O273  | 1.891 | .     | S |
| Ti266 | O283  | 1.979 | .     | S |
| Ti266 | O271  | 1.819 | .     | S |
| Ti267 | O271  | 1.940 | .     | S |
| Ti267 | O274  | 1.914 | .     | S |
| Ti267 | O287  | 1.952 | .     | S |
| Ti267 | O269  | 1.957 | .     | S |
| Ti267 | O275  | 1.828 | .     | S |
| Ti268 | O272  | 2.105 | .     | S |
| Ti268 | O273  | 2.027 | .     | S |
| Ti268 | O288  | 1.917 | .     | S |
| Ti268 | O270  | 2.002 | .     | S |
| Ti268 | O276  | 1.979 | .     | S |
| O271  | Ti278 | 1.808 | .     | S |
| O272  | Ti313 | 1.976 | .     | S |
| O275  | Ti279 | 1.858 | .     | S |
| O276  | Ti313 | 2.020 | .     | S |
| O276  | Ti280 | 1.933 | .     | S |
| Ti277 | O281  | 1.951 | .     | S |
| Ti277 | O286  | 2.049 | .     | S |
| Ti278 | O282  | 1.940 | .     | S |
| Ti278 | O287  | 1.997 | .     | S |
| Ti278 | O285  | 2.111 | .     | S |

|       |       |       |       |   |
|-------|-------|-------|-------|---|
| Ti279 | O283  | 2.047 | .     | S |
| Ti279 | O286  | 2.087 | .     | S |
| Ti279 | O281  | 2.029 | .     | S |
| Ti280 | O284  | 1.964 | .     | S |
| Ti280 | O285  | 1.889 | .     | S |
| Ti280 | O282  | 2.106 | .     | S |
| O284  | Ti313 | 1.914 | .     | S |
| O284  | Ti325 | 1.885 | .     | S |
| Ti289 | O293  | 2.014 | .     | S |
| Ti289 | O298  | 1.935 | .     | S |
| Ti289 | O130  | 1.991 | 1_545 | S |
| Ti290 | O294  | 1.992 | .     | S |
| Ti290 | O299  | 2.017 | .     | S |
| Ti290 | O297  | 2.113 | .     | S |
| Ti290 | O295  | 1.836 | .     | S |
| Ti290 | O321  | 2.058 | .     | S |
| Ti291 | O295  | 2.021 | .     | S |
| Ti291 | O298  | 2.033 | .     | S |
| Ti291 | O311  | 1.906 | .     | S |
| Ti291 | O293  | 1.947 | .     | S |
| Ti291 | O317  | 2.022 | .     | S |
| Ti291 | O299  | 1.956 | .     | S |
| Ti292 | O296  | 1.997 | .     | S |
| Ti292 | O297  | 1.907 | .     | S |
| Ti292 | O294  | 2.137 | .     | S |
| Ti292 | O126  | 2.110 | 1_545 | S |
| Ti292 | O300  | 1.938 | .     | S |
| O293  | Ti123 | 1.894 | 1_545 | S |
| O294  | Ti316 | 2.121 | .     | S |
| O295  | Ti302 | 1.918 | .     | S |
| O296  | Ti337 | 1.914 | .     | S |
| O297  | Ti122 | 2.092 | 1_545 | S |
| O298  | Ti313 | 1.902 | .     | S |
| O300  | Ti337 | 1.969 | .     | S |
| O300  | Ti304 | 1.905 | .     | S |
| Ti301 | O305  | 1.977 | .     | S |
| Ti301 | O310  | 2.073 | .     | S |
| Ti301 | O142  | 2.053 | 1_545 | S |
| Ti302 | O306  | 1.997 | .     | S |
| Ti302 | O311  | 2.006 | .     | S |
| Ti302 | O309  | 1.902 | .     | S |
| Ti302 | O307  | 1.930 | .     | S |
| Ti302 | O333  | 2.003 | .     | S |
| Ti303 | O307  | 1.941 | .     | S |
| Ti303 | O310  | 1.967 | .     | S |
| Ti303 | O305  | 2.032 | .     | S |
| Ti303 | O329  | 1.992 | .     | S |
| Ti303 | O311  | 1.835 | .     | S |
| Ti304 | O308  | 2.042 | .     | S |
| Ti304 | O309  | 2.009 | .     | S |
| Ti304 | O306  | 1.923 | .     | S |



|       |       |       |       |   |
|-------|-------|-------|-------|---|
| Ti304 | O138  | 2.037 | 1_545 | S |
| Ti304 | O312  | 1.972 | .     | S |
| O305  | Ti135 | 2.030 | 1_545 | S |
| O306  | Ti328 | 1.876 | .     | S |
| O308  | Ti337 | 1.871 | .     | S |
| O308  | Ti349 | 1.943 | .     | S |
| O309  | Ti134 | 1.898 | 1_545 | S |
| O310  | Ti325 | 2.033 | .     | S |
| O312  | Ti349 | 2.027 | .     | S |
| Ti313 | O317  | 2.120 | .     | S |
| Ti313 | O322  | 1.958 | .     | S |
| Ti314 | O318  | 1.925 | .     | S |
| Ti314 | O323  | 1.987 | .     | S |
| Ti314 | O321  | 2.029 | .     | S |
| Ti314 | O319  | 1.797 | .     | S |
| Ti315 | O319  | 1.995 | .     | S |
| Ti315 | O322  | 2.096 | .     | S |
| Ti315 | O335  | 1.990 | .     | S |
| Ti315 | O317  | 1.974 | .     | S |
| Ti315 | O323  | 1.962 | .     | S |
| Ti316 | O320  | 2.023 | .     | S |
| Ti316 | O321  | 1.926 | .     | S |
| Ti316 | O318  | 2.104 | .     | S |
| Ti316 | O324  | 1.892 | .     | S |
| O319  | Ti326 | 1.870 | .     | S |
| O320  | Ti361 | 1.913 | .     | S |
| O324  | Ti361 | 1.941 | .     | S |
| O324  | Ti328 | 1.875 | .     | S |
| Ti325 | O329  | 1.885 | .     | S |
| Ti325 | O334  | 2.027 | .     | S |
| Ti326 | O330  | 2.097 | .     | S |
| Ti326 | O335  | 2.045 | .     | S |
| Ti326 | O333  | 1.968 | .     | S |
| Ti326 | O331  | 1.930 | .     | S |
| Ti327 | O331  | 1.992 | .     | S |
| Ti327 | O334  | 1.973 | .     | S |
| Ti327 | O329  | 2.010 | .     | S |
| Ti327 | O335  | 1.849 | .     | S |
| Ti328 | O332  | 2.018 | .     | S |
| Ti328 | O333  | 2.112 | .     | S |
| Ti328 | O330  | 1.979 | .     | S |
| Ti328 | O336  | 1.955 | .     | S |
| O332  | Ti361 | 1.849 | .     | S |
| O332  | Ti373 | 1.877 | .     | S |
| O336  | Ti373 | 2.063 | .     | S |
| Ti337 | O341  | 1.913 | .     | S |
| Ti337 | O346  | 1.958 | .     | S |
| Ti337 | O178  | 2.033 | 1_545 | S |
| Ti338 | O342  | 1.947 | .     | S |
| Ti338 | O347  | 1.997 | .     | S |
| Ti338 | O345  | 2.072 | .     | S |

|       |       |       |       |   |
|-------|-------|-------|-------|---|
| Ti338 | O355  | 1.808 | .     | S |
| Ti338 | O369  | 2.067 | .     | S |
| Ti339 | O343  | 2.044 | .     | S |
| Ti339 | O346  | 2.072 | .     | S |
| Ti339 | O359  | 1.915 | .     | S |
| Ti339 | O341  | 2.085 | .     | S |
| Ti339 | O365  | 2.085 | .     | S |
| Ti340 | O344  | 1.984 | .     | S |
| Ti340 | O345  | 1.936 | .     | S |
| Ti340 | O360  | 1.910 | .     | S |
| Ti340 | O342  | 2.111 | .     | S |
| Ti340 | O174  | 2.121 | 1_545 | S |
| O341  | Ti171 | 1.996 | 1_545 | S |
| O342  | Ti364 | 2.102 | .     | S |
| O343  | Ti350 | 1.998 | .     | S |
| O345  | Ti170 | 2.090 | 1_545 | S |
| O346  | Ti361 | 1.962 | .     | S |
| O347  | Ti351 | 1.962 | .     | S |
| O348  | Ti352 | 1.904 | .     | S |
| Ti349 | O353  | 2.119 | .     | S |
| Ti349 | O358  | 2.059 | .     | S |
| Ti349 | O190  | 2.031 | 1_545 | S |
| Ti350 | O354  | 2.089 | .     | S |
| Ti350 | O359  | 2.056 | .     | S |
| Ti350 | O357  | 1.889 | .     | S |
| Ti350 | O355  | 1.801 | .     | S |
| Ti350 | O381  | 1.979 | .     | S |
| Ti351 | O355  | 1.911 | .     | S |
| Ti351 | O358  | 1.954 | .     | S |
| Ti351 | O353  | 2.013 | .     | S |
| Ti351 | O377  | 1.952 | .     | S |
| Ti351 | O359  | 1.901 | .     | S |
| Ti352 | O356  | 2.090 | .     | S |
| Ti352 | O357  | 2.007 | .     | S |
| Ti352 | O354  | 1.972 | .     | S |
| Ti352 | O186  | 1.968 | 1_545 | S |
| Ti352 | O360  | 1.933 | .     | S |
| O353  | Ti183 | 2.025 | 1_545 | S |
| O354  | Ti376 | 1.951 | .     | S |
| O357  | Ti182 | 1.895 | 1_545 | S |
| O358  | Ti373 | 2.069 | .     | S |
| Ti361 | O365  | 1.945 | .     | S |
| Ti361 | O370  | 2.048 | .     | S |
| Ti362 | O366  | 2.001 | .     | S |
| Ti362 | O371  | 1.996 | .     | S |
| Ti362 | O369  | 2.082 | .     | S |
| Ti362 | O379  | 1.836 | .     | S |
| Ti363 | O367  | 2.033 | .     | S |
| Ti363 | O370  | 2.079 | .     | S |
| Ti363 | O383  | 1.856 | .     | S |
| Ti363 | O365  | 2.013 | .     | S |

|       |       |       |       |   |
|-------|-------|-------|-------|---|
| Ti364 | O368  | 1.998 | .     | S |
| Ti364 | O369  | 1.886 | .     | S |
| Ti364 | O384  | 1.921 | .     | S |
| Ti364 | O366  | 2.110 | .     | S |
| O367  | Ti374 | 1.951 | .     | S |
| O371  | Ti375 | 1.956 | .     | S |
| O372  | Ti376 | 1.914 | .     | S |
| Ti373 | O377  | 2.026 | .     | S |
| Ti373 | O382  | 2.044 | .     | S |
| Ti374 | O378  | 2.032 | .     | S |
| Ti374 | O383  | 1.995 | .     | S |
| Ti374 | O381  | 1.988 | .     | S |
| Ti374 | O379  | 1.850 | .     | S |
| Ti375 | O379  | 1.982 | .     | S |
| Ti375 | O382  | 1.928 | .     | S |
| Ti375 | O377  | 1.951 | .     | S |
| Ti375 | O383  | 1.817 | .     | S |
| Ti376 | O380  | 2.082 | .     | S |
| Ti376 | O381  | 2.099 | .     | S |
| Ti376 | O378  | 1.931 | .     | S |
| Ti376 | O384  | 1.998 | .     | S |
| C385  | C386  | 1.218 | .     | T |
| C385  | C406  | 1.358 | .     | A |
| C386  | C387  | 1.330 | .     | D |
| C387  | C388  | 1.214 | .     | T |
| C388  | C389  | 1.327 | .     | D |
| C389  | C390  | 1.218 | .     | T |
| C390  | C391  | 1.361 | .     | A |
| C391  | C392  | 1.322 | .     | D |
| C391  | S393  | 1.800 | .     | S |
| C392  | C394  | 1.376 | .     | A |
| C392  | H395  | 1.083 | .     | S |
| S393  | C396  | 1.811 | .     | S |
| C394  | C396  | 1.332 | .     | D |
| C394  | H397  | 1.083 | .     | S |
| C396  | C398  | 1.386 | .     | A |
| C398  | H399  | 1.083 | .     | S |
| C398  | C400  | 1.351 | .     | D |
| C400  | C401  | 1.364 | .     | A |
| C400  | P402  | 1.842 | .     | S |
| C401  | N405  | 1.159 | .     | T |
| P402  | O424  | 1.533 | 1_445 | D |
| P402  | O404  | 1.725 | .     | S |
| P402  | O403  | 1.742 | .     | S |
| O403  | Ti135 | 1.823 | 1_445 | S |
| O404  | Ti111 | 2.054 | 1_445 | S |
| C406  | C407  | 1.324 | .     | D |
| C406  | S408  | 1.800 | .     | S |
| C407  | C409  | 1.378 | .     | A |
| C407  | H410  | 1.083 | .     | S |
| S408  | C411  | 1.807 | .     | S |

|      |      |       |       |   |
|------|------|-------|-------|---|
| C409 | C411 | 1.328 | .     | D |
| C409 | H412 | 1.082 | .     | S |
| C411 | N421 | 1.357 | .     | A |
| H413 | N421 | 1.043 | .     | S |
| C414 | C415 | 1.322 | .     | D |
| C414 | N421 | 1.428 | .     | S |
| C414 | N422 | 1.414 | .     | S |
| C415 | C416 | 1.385 | .     | A |
| C415 | H417 | 1.081 | .     | S |
| C416 | C418 | 1.329 | .     | D |
| C416 | H419 | 1.082 | .     | S |
| C418 | H420 | 1.084 | .     | S |
| C418 | N422 | 1.346 | .     | A |
| N422 | H423 | 1.042 | .     | S |
| O424 | P402 | 1.533 | 1_665 | D |
